# Supplementary material
Source: PubMed Central journal article supplement (PMC5833233)
Supplement: Supplementary_Materials.pdf [file Supplementary_Materials.pdf]

# Supplementary Materials

## Table of Contents

|                                                                                                                                                                                                                                                                                                                                                                                                                                                                                                                                                                                         |    |
|-----------------------------------------------------------------------------------------------------------------------------------------------------------------------------------------------------------------------------------------------------------------------------------------------------------------------------------------------------------------------------------------------------------------------------------------------------------------------------------------------------------------------------------------------------------------------------------------|----|
| Abbreviations.....                                                                                                                                                                                                                                                                                                                                                                                                                                                                                                                                                                      | 2  |
| Supplementary Methods .....                                                                                                                                                                                                                                                                                                                                                                                                                                                                                                                                                             | 3  |
| Study Eligibility Criteria.....                                                                                                                                                                                                                                                                                                                                                                                                                                                                                                                                                         | 3  |
| Search Strategy and Terms .....                                                                                                                                                                                                                                                                                                                                                                                                                                                                                                                                                         | 3  |
| Study Selection, Data Extraction and Quality Assessment.....                                                                                                                                                                                                                                                                                                                                                                                                                                                                                                                            | 3  |
| Statistical Analysis.....                                                                                                                                                                                                                                                                                                                                                                                                                                                                                                                                                               | 3  |
| Supplementary Tables.....                                                                                                                                                                                                                                                                                                                                                                                                                                                                                                                                                               | 5  |
| <b>Supplementary Table 1.</b> Necrotizing enterocolitis studies.....                                                                                                                                                                                                                                                                                                                                                                                                                                                                                                                    | 5  |
| <b>Supplementary Table 2.</b> Intestinal transplantation studies.....                                                                                                                                                                                                                                                                                                                                                                                                                                                                                                                   | 6  |
| <b>Supplementary Table 3.</b> Studies regarding short bowel syndrome.....                                                                                                                                                                                                                                                                                                                                                                                                                                                                                                               | 8  |
| <b>Supplementary Table 4.</b> Coeliac disease, Crohn’s disease and enteropathy studies.....                                                                                                                                                                                                                                                                                                                                                                                                                                                                                             | 12 |
| <b>Supplementary Table 5.</b> Gastrointestinal toxicity from chemo-radiation therapies studies.....                                                                                                                                                                                                                                                                                                                                                                                                                                                                                     | 15 |
| <b>Supplementary Table 6.</b> Studies regarding citrulline levels in critical illness or other conditions.....                                                                                                                                                                                                                                                                                                                                                                                                                                                                          | 18 |
| <b>Supplementary Table 7.</b> Meta-regression results of the correlation of citrulline with small bowel length with four potential sources of heterogeneity.....                                                                                                                                                                                                                                                                                                                                                                                                                        | 22 |
| <b>Supplementary Table 8.</b> Diagnostic accuracy characteristics from studies investigating short bowel syndrome.....                                                                                                                                                                                                                                                                                                                                                                                                                                                                  | 22 |
| <b>Supplementary Table 9.</b> Results of diagnostic meta-analysis regarding sensitivity and specificity in patients with all conditions and only short bowel syndrome.....                                                                                                                                                                                                                                                                                                                                                                                                              | 23 |
| Supplementary Figures .....                                                                                                                                                                                                                                                                                                                                                                                                                                                                                                                                                             | 24 |
| <b>Supplementary Figure 1.</b> Risk of bias summary: review authors’ judgements about each risk of bias item for each included study.....                                                                                                                                                                                                                                                                                                                                                                                                                                               | 24 |
| <b>Supplementary Figure 2.</b> Forest plot of Intestinal Transplantation (citrulline concentrations with rejection) – without meta-analysis.....                                                                                                                                                                                                                                                                                                                                                                                                                                        | 25 |
| <b>Supplementary Figure 3.</b> Forest plots of short bowel syndrome correlations with small bowel length – subgroup analyses by (A) continent, (B) country, (C) patient type, and (D) citrulline measurement method.....                                                                                                                                                                                                                                                                                                                                                                | 26 |
| <b>Supplementary Figure 4.</b> Forest plots. (A) Mean differences of citrulline levels between PN dependent and independent SBS patients. (B) Mean increase of citrulline levels after treatment with teduglutide vs placebo in SBS patients. (C) Mean increase of citrulline levels after treatment with teduglutide vs baseline in SBS patients. (D) Mean difference of citrulline levels in coeliac disease patients who had received GFD treatment vs those who had not.....                                                                                                        | 27 |
| <b>Supplementary Figure 5.</b> Funnel plots. A. Mean citrulline levels: All conditions vs controls (30 studies). No asymmetry seen. B. Mean citrulline levels: SBS vs controls. No asymmetry observed. C. Mean citrulline levels: CeD/Enteropathy vs controls. No asymmetry observed. D. Mean citrulline levels: PN dependent vs PN independent patients. No asymmetry observed. E. Citrulline levels with disease severity in all conditions (28 studies). No asymmetry seen. F. Citrulline levels with disease severity in mucositis after chemoradiation. No asymmetry observed..... | 28 |
| <b>Supplementary Figure 6.</b> Summary ROC curve for diagnostic accuracy in SBS patients.....                                                                                                                                                                                                                                                                                                                                                                                                                                                                                           | 29 |
| <b>Supplementary Figure 7.</b> Forest plots of sensitivity and specificity in all patient conditions (26 studies).....                                                                                                                                                                                                                                                                                                                                                                                                                                                                  | 30 |
| Supplementary References.....                                                                                                                                                                                                                                                                                                                                                                                                                                                                                                                                                           | 31 |

**Abbreviations**

AUC: Area under the curve

BMI: Body mass index

CC: Correlation coefficient

CD: Crohn's disease

CeD: Coeliac disease

CI: Confidence interval

df: Degrees of freedom

FN: False negatives

FP: False positives

GFD: Gluten free diet

GLP-2: Glucagon-like peptide-2

HIV: Human immunodeficiency virus

HPLC: High performance liquid chromatography

HPN: home parenteral nutrition

HSROC: Hierarchical summary receiver operating curve

IEC: Ion exchange chromatography

IF: Intestinal failure

MD: Mean difference

MOOSE: Meta-analysis of Observational Studies in Epidemiology

NEC: Necrotising enterocolitis

P/p: p-value

PN: Parenteral nutrition

PRISMA: Preferred Reporting Items for Systematic Reviews and Meta-Analyses

ROC: Receiver operating curve

RTI: Research Triangle Institute

SBS: short bowel syndrome

SE: Standard error

SMD: Standardised mean difference

sROC: summary Receiver operating curve

TMS: tandem mass spectrometry

TN: true negative

TP: true positives

WMD: Weighted mean difference

$\mu$ : micro

$\mu$ M:  $\mu$ mol/L

## Supplementary Methods

### *Study Eligibility Criteria*

The inclusion criteria for this systematic review were: any empirical study (abstract and full paper) describing investigation of citrulline in relation to the term intestinal function. Intestinal function was considered in a very broad term and could mean enterocyte mass, diarrhoea, absorption, or even deranged citrulline levels in correlation with a compromised gut. The only papers that were excluded were those whose object of investigation was not related to intestinal function. There was no restriction to language of papers and the types of interventions could include observational studies, randomized controlled trials, case series and case reports. For the meta-analysis papers had to provide sufficient data to produce an effect measure.

### *Search Strategy and Terms*

PRISMA guidelines and MOOSE checklist for systematic reviews and meta-analyses were used (Moher et al., 2009; Stroup et al., 2000). Electronic database searches were conducted in Google Scholar, Pubmed/Medline, Scopus, EMBASE and Cochrane Library with no year limits. Publisher databases were also searched (Sciencedirect.com, link.springer.com, Wiley library Online, Highwire Press, Nature.com, Ovid, Cambridge University Press). The search keywords were: citrulline, intestine, gut, bowel, intestinal, mucositis, Crohn's disease, short bowel, radiotherapy, cancer, sepsis, absorption, enterocyte, critically ill, and colitis. The date of search was up until 1 July 2015. The bibliographies from all included manuscripts and hand searching of relevant gastroenterology and nutrition journals were used to identify further references. The present study does not report results of a clinical trial and it did not involve primary research on humans.

### *Study Selection, Data Extraction and Quality Assessment*

The resulting studies (in abstract form) were assessed against the inclusion criteria. When there was insufficient information available in the abstract, the full text was reviewed. Then, data were extracted from the selected studies including: author, year of publication, aim of the study, country, continent, sample size, mean age, male percentage, study design, results. The quality of studies (risk of bias) was assessed with elements from Cochrane Collaboration's tool (Higgins et al., 2008) and the RTI Item Bank for Observational Studies, (Viswanathan and Berkman, 2012; Viswanathan et al., 2013) which assess selection, attrition, detection and confounding biases. For the meta-analysis, studies were examined for *p*-values, means and standard deviations, correlation coefficients or other metrics depicting the association of citrulline with intestinal function. Metrics were converted to the standardized mean difference (SMD) (Lipsey and Wilson, 2001; Cooper et al., 2009) or weighted mean difference (WMD), where means and standard deviations for groups under comparison were identified, (Borenstein et al., 2008) and/or correlation coefficients (CCs). Examples of outcomes included correlations of citrulline levels with small bowel length, with absorption tests/enteral caloric intake, differences in citrulline between tests groups and controls etc. Particularly, we included studies that satisfied the following criteria: a) for correlations of citrulline with small bowel length, only short bowel syndrome; b) for absorptive marker correlations, all patient groups c) for gastrointestinal disease severity, all patient groups. Where available, diagnostic accuracy data were also collected.

### *Statistical Analysis*

Quantitative analysis was performed with Stata 12.0 (StataCorp LP, Texas), Review Manager 5.3 (Cochrane Collaboration, Copenhagen), SPSS 22.0 (IBM Corp., Armonk, NY), and R (R Foundation for Statistical Computing, Vienna, Austria). SMDs/WMDs/CCs were extracted from studies when available. The strength of association was categorized as following: small, SMD = 0.2; moderate, SMD = 0.5; and large, SMD = 0.8; WMD has units and reflects the units of the outcome under description; small, CC = 0.1; moderate, CC = 0.3; and large, CC = 0.5. (Cohen, 1988; Faraone, 2008) A random effects model was used to produce a pooled estimate of the SMDs/WMDs/CCs. With the random effect model, studies are weighted by the inverse of their variance with tau-squared ( $\tau^2$ ), taking into account the within study variance for estimating

the correlation coefficient in each study and the between studies variance (e.g. because of different designs or methods used but also possible biological reasons) (DerSimonian and Laird, 1986). Statistical heterogeneity was assessed using Cochran's  $Q$  test, which examines the null hypothesis that all studies are evaluating the same effect (Higgins et al., 2003). Statistical significance for heterogeneity was set as  $p \leq 0.10$ . Heterogeneity was quantified using the  $I^2$  statistic, indicating the percentage of total variation across studies that is due to heterogeneity rather than chance (Higgins et al., 2003).  $I^2$  value of 0 % was considered to indicate no observed heterogeneity whilst a value  $> 50$  % substantial heterogeneity (Fragkos et al., 2014; Huedo-Medina et al., 2006; Bowden et al., 2011; Higgins and Thompson, 2002). Heterogeneity was further investigated with subgroup analysis and meta-regression. Publication bias was assessed using funnel plots, Egger's test, Begg's test and Rosenthal's number (Begg and Mazumdar, 1994; Egger et al., 1997; Rosenthal, 1979). A funnel plot was created for the clinical measures with more than 10 studies (Sterne et al., 2011). This is a scatter plot of the effect estimates from individual studies against a measurement of the study's sample size or precision. Resemblance of a symmetrical inverted funnel supports that findings are due to sampling variation alone; thus, absence of bias (Sterne et al., 2011).

Regarding correlation coefficients, it is common practice not to perform syntheses on the correlation coefficient itself because the variance depends strongly on the correlation. Rather, the correlation is converted to the Fisher's  $z$  scale (not to be confused with the  $z$ -statistics used with significance tests), and all analyses are performed using the transformed values. The results, such as the summary effect and its confidence interval, would then be converted back to correlations for presentation. The transformation from sample correlation  $r$  to Fisher's  $z$  is given by  $z = 0.5 \times \ln\left(\frac{1+r}{1-r}\right)$ . The variance of  $z$  is  $V_z = \frac{1}{n-3}$  and the

standard error is  $SE_z = \sqrt{V_z}$ , where  $n$  is the sample size of the study. We then convert each of these values

back to correlation units using  $r = \frac{e^{2z} - 1}{e^{2z} + 1}$ .

Regarding diagnostic accuracy data, following the robust construction of the diagnostic  $2 \times 2$  tables, specificity, sensitivity, and 95% CI for each of the included studies was calculated. A hierarchical summary receiver operating curve (HSROC) model was fitted to provide a summary receiver operating curve and to allow derivation of pooled sensitivity and specificity estimates (Harbord et al., 2007). As suggested by the Cochrane Diagnostic Test Accuracy group (<http://srdta.cochrane.org/>), no analyses of study heterogeneity were performed, as these tests do not account for heterogeneity explained by phenomena, such as positivity threshold effects (Higgins et al., 2008).

## Supplementary Tables

**Supplementary Table 1.** Necrotizing enterocolitis studies.

| No | Authors               | Settings (sample and design)                                                                                                                                                                                                                                                                                                                                                                                                                                                                                                                           | Main Results                                                                                                                                                                                                                                                                                                                                                                                                                                                                                                                                                                                                                                                                                                                                                                               |
|----|-----------------------|--------------------------------------------------------------------------------------------------------------------------------------------------------------------------------------------------------------------------------------------------------------------------------------------------------------------------------------------------------------------------------------------------------------------------------------------------------------------------------------------------------------------------------------------------------|--------------------------------------------------------------------------------------------------------------------------------------------------------------------------------------------------------------------------------------------------------------------------------------------------------------------------------------------------------------------------------------------------------------------------------------------------------------------------------------------------------------------------------------------------------------------------------------------------------------------------------------------------------------------------------------------------------------------------------------------------------------------------------------------|
| 1  | Becker et al. (2000)  | <ul style="list-style-type: none"> <li>Aim: to determine whether premature infants who have necrotizing enterocolitis have deficiencies in glutamine and arginine</li> <li>4-month prospective cohort study of serum amino acid and urea levels in premature infants</li> <li>Serum amino acid and urea levels were measured by high-pressure liquid chromatography and enzymatic methods</li> <li>Control (n = 32), necrotizing enterocolitis (n = 13) (comparable for birth weight, gestational age, and Apgar scores)</li> </ul>                    | <ul style="list-style-type: none"> <li>Days 7, 14, 21: Median values of glutamine: 37 % to 57 % lower in the necrotizing enterocolitis group compared to control group (p &lt; 0.05)</li> <li>Days 7 and 14: Median values of arginine, glutamine, alanine, lysine, ornithine, and threonine were decreased by 36 % to 67 % (p &lt; 0.05) in the necrotizing enterocolitis group</li> <li>Citrulline levels were decreased in the necrotizing enterocolitis group compared to control (p &lt; 0.05)</li> </ul>                                                                                                                                                                                                                                                                             |
| 2  | Ioannou et al. (2012) | <ul style="list-style-type: none"> <li>Plasma citrulline levels were measured prospectively in 17 preterm neonates with necrotizing enterocolitis stage II during the entire course of the disease</li> <li>Serial citrulline determinations in 24 healthy preterm neonates on 2, 7, 14, 21 and 28 days of life, served as reference values</li> </ul>                                                                                                                                                                                                 | <ul style="list-style-type: none"> <li>In healthy preterm neonates plasma citrulline levels showed a progressive increase in relation to age</li> <li>In neonates presenting with necrotizing enterocolitis, mean citrulline levels were significantly lower as compared to controls' citrulline levels (day of life 7: 16.85 ± 4.2 vs 20.5 ± 4.5 µmol/L, p &lt; 0.05; day of life 14: 18 ± 4.2 vs 23.5 ± 4.3 µmol/L, p &lt; 0.01; day of life 21: 17 ± 2.5 vs 30 ± 5.7 µmol/L, p &lt; 0.01)</li> <li>Optimal citrulline cut-off distinguishing necrotizing enterocolitis patient from controls: 17.75 µmol/L (sensitivity 76%, specificity 87%)</li> <li>Plasma citrulline at presentation correlated inversely with the duration of parenteral nutrition (r=-0.49, p&lt;0.05)</li> </ul> |
| 3  | Celik et al. (2013)   | <ul style="list-style-type: none"> <li>Plasma citrulline levels of neonates with a gestational age less than 32 weeks and ≤ 1500 g who developed necrotizing enterocolitis stage II/III were measured by high-performance liquid chromatography</li> <li>36 preterm infants including 20 with necrotizing enterocolitis and 16 controls</li> </ul>                                                                                                                                                                                                     | <ul style="list-style-type: none"> <li>Median citrulline levels of necrotizing enterocolitis and control groups were 8.6 and 20.18 µmol/L (p &lt; 0.05), and cut-off level of citrulline was 13.15 µmol/L with a sensitivity of 80% and a specificity of 82%</li> <li>Median arginine levels of necrotizing enterocolitis and control groups were 22.02 and 39.89 µmol/L (p &lt; 0.05), and cut-off level of arginine was 28.52 µmol/L with a sensitivity of 70% and a specificity of 75%</li> <li>Blood sampling day, gender, and parenteral or enteral nutrition did not affect amino acid levels</li> </ul>                                                                                                                                                                             |
| 4  | Englund et al. (2014) | <ul style="list-style-type: none"> <li>Aim: To determine whether citrulline concentrations measured in neonatal dried blood spots could predict necrotizing enterocolitis</li> <li>National Danish registries were retrospectively searched to identify 361 babies born between 2003 and 2009, diagnosed with necrotizing enterocolitis and a valid citrulline concentration</li> <li>Control group: 1083 healthy new-borns (three controls for every new-born with necrotizing enterocolitis, matched for birthweight and gestational age)</li> </ul> | <ul style="list-style-type: none"> <li>Neonatal dried blood spots were collected between 2 and 21 days of life, with a median of 8 days</li> <li>Necrotizing enterocolitis was not associated with low citrulline concentration (p = 0.73)</li> </ul>                                                                                                                                                                                                                                                                                                                                                                                                                                                                                                                                      |

Supplementary Table 2. Intestinal transplantation studies.

| No | Authors                 | Settings (sample and design)                                                                                                                                                                                                                                                                                                                                                                                                                                                                                                                                                                                                                                            | Main Results                                                                                                                                                                                                                                                                                                                                                                                                                                                                                                                                                                                                                                                                                                                                                                                                                                                                                                                                                                                                                                                                                                                                                                  |
|----|-------------------------|-------------------------------------------------------------------------------------------------------------------------------------------------------------------------------------------------------------------------------------------------------------------------------------------------------------------------------------------------------------------------------------------------------------------------------------------------------------------------------------------------------------------------------------------------------------------------------------------------------------------------------------------------------------------------|-------------------------------------------------------------------------------------------------------------------------------------------------------------------------------------------------------------------------------------------------------------------------------------------------------------------------------------------------------------------------------------------------------------------------------------------------------------------------------------------------------------------------------------------------------------------------------------------------------------------------------------------------------------------------------------------------------------------------------------------------------------------------------------------------------------------------------------------------------------------------------------------------------------------------------------------------------------------------------------------------------------------------------------------------------------------------------------------------------------------------------------------------------------------------------|
| 1  | Pappas et al. (2001)    | <ul style="list-style-type: none"> <li>Aim: To investigate impact of acute cellular rejection of intestinal allografts on serum citrulline levels</li> <li>Sample: healthy volunteers (n = 6), patients who underwent small bowel transplant (n = 7)</li> <li>Concurrent measurement of serum citrulline levels with characterization of acute cellular rejection</li> <li>Rejection confirmed by biopsy and graded by standardized criteria</li> </ul>                                                                                                                                                                                                                 | <ul style="list-style-type: none"> <li>Controls vs post-transplantation samples: significantly higher mean citrulline concentrations at any rejection grade</li> <li>Mean concentrations declined significantly as rejection severity increased</li> <li>Statistically significant overall downward trend (<math>p &lt; 0.05</math>)</li> <li>In sequential measurements, citrulline levels increased significantly over time with declining severity of rejection</li> <li>Significant increase in mean citrulline concentrations between post-transplant days 3-16 and 52-60 (<math>p &lt; 0.01</math>)</li> </ul>                                                                                                                                                                                                                                                                                                                                                                                                                                                                                                                                                          |
| 2  | Gondolesi et al. (2002) | <ul style="list-style-type: none"> <li>Aim: To investigate impact of acute cellular rejection of intestinal allografts on serum citrulline levels</li> <li>Concurrent measurement of plasma citrulline levels with histopathological diagnosis from biopsy [acute cellular rejection (normal, indeterminate, mild, or moderate), viral enteritis (cytomegalovirus or adenovirus), and for other miscellaneous histological diagnoses</li> <li>Sample: 9 consecutive intestinal transplant recipients</li> <li>Thirty-two citrulline measurements</li> </ul>                                                                                                             | <ul style="list-style-type: none"> <li>Mean citrulline levels <ul style="list-style-type: none"> <li>overall: <math>17.5 \pm 13.3</math> <math>\mu\text{mol/L}</math> (range, 0.8 to 68 <math>\mu\text{mol/L}</math>)</li> <li>normal biopsies: <math>26 \pm 15.7</math> <math>\mu\text{mol/L}</math></li> <li>indeterminate biopsies: <math>11.9 \pm 7.7</math> <math>\mu\text{mol/L}</math></li> <li>mild rejection: <math>15.4 \pm 7.5</math> <math>\mu\text{mol/L}</math></li> <li>moderate rejection: <math>5.5 \pm 0.7</math> <math>\mu\text{mol/L}</math></li> <li>viral enteritis: <math>9.3 \pm 5.85</math> <math>\mu\text{mol/L}</math></li> <li>functional bowel biopsies (n = 22) vs dysfunctional bowel biopsies (n = 10): <math>19.3 \pm 13.6</math> <math>\mu\text{mol/L}</math> vs <math>7.8 \pm 4.7</math> <math>\mu\text{mol/L}</math>; <math>p = 0.0001</math></li> </ul> </li> <li>Pearson correlation coefficient between citrulline levels and rejection: <math>-0.425</math> (<math>p = 0.05</math>)</li> <li>Spearman's rho correlation coefficient between citrulline levels and rejection: <math>-0.52</math> (<math>p &lt; 0.01</math>)</li> </ul> |
| 3  | Pappas et al. (2002)    | <ul style="list-style-type: none"> <li>Aim: To investigate impact of rejection of intestinal allografts on serum citrulline levels</li> <li>10 pre-transplant samples, 11 control specimens, 49 post-transplant samples from 7 patients along with 1 pre-transplant serum sample from each patient and 6 samples from healthy controls, 83 sequential serum samples from 11 patients (5 children, 6 adults), median follow-up 26 days</li> <li>All samples obtained within 3 days of biopsy</li> </ul>                                                                                                                                                                  | <ul style="list-style-type: none"> <li>Pre-transplant specimens vs healthy controls: significant difference in mean citrulline (<math>p &lt; 0.01</math>)</li> <li>Mean citrulline levels declined significantly with increasing acute cellular rejection in post-transplant period</li> <li>Mean citrulline levels: pre-transplant: <math>20.1 \pm 10.3</math> <math>\mu\text{mol/L}</math> vs control: <math>40.0 \pm 7.3</math> <math>\mu\text{mol/L}</math> (<math>p &lt; 0.01</math>)</li> </ul>                                                                                                                                                                                                                                                                                                                                                                                                                                                                                                                                                                                                                                                                         |
| 4  | Gondolesi et al. (2004) | <ul style="list-style-type: none"> <li>Aim: To analyse plasma citrulline in intestinal transplant recipients without rejection or other histological abnormalities</li> <li>Sample: 40 patients</li> <li>Plasma citrulline measured with high performance liquid chromatography Beckman amino acid analyser (within 24 h of protocol or clinically indicated endoscopic biopsy procured <math>&gt; 6</math> and <math>&lt; 360</math> days post-transplant)</li> <li>Measurements included for analysis corresponded to normal (or minimally abnormal) biopsies that remained so for 7 days</li> <li>Criteria met in: 145 samples, 10 adults and 14 children</li> </ul> | <ul style="list-style-type: none"> <li>Mean citrulline levels: <ul style="list-style-type: none"> <li>overall: <math>34.0 \pm 19.9</math> <math>\mu\text{mol/L}</math></li> <li>between 6 and 30 days post-transplant: <math>22.2 \pm 13.2</math> <math>\mu\text{mol/L}</math></li> <li>between 30 and 60 days post-transplant: <math>34.9 \pm 17.2</math> <math>\mu\text{mol/L}</math> (<math>p = 0.001</math>)</li> <li>between 60 and 90 days post-transplant: <math>43.6 \pm 15.8</math> <math>\mu\text{mol/L}</math> (<math>p = 0.001</math>)</li> <li>stable until end of first year</li> </ul> </li> <li>Plasma citrulline lower in 13 patients with body surface area <math>\leq 1</math> <math>\text{m}^2</math> vs 11 patients with body surface area <math>\geq 1.1</math> <math>\text{m}^2</math> (<math>p = 0.0001</math>)</li> <li>Plasma citrulline increased linearly during first 120 days in both body surface area groups (<math>r = 0.573</math>, <math>r = 0.512</math>; <math>p = 0.0001</math>)</li> </ul>                                                                                                                                             |
| 5  | Pappas et al. (2004a)   | <ul style="list-style-type: none"> <li>Aim: To compare serum citrulline concentrations with biopsy-based grades of rejection</li> <li>Sample: 26 isolated intestinal and multivisceral transplant recipients</li> <li>Other factors recorded: patient and donor age and sex, ischemia time, serum creatinine, type of transplant.</li> <li>Straight-line fitting of citrulline levels over time (stepwise linear regression)</li> </ul>                                                                                                                                                                                                                                 | <ul style="list-style-type: none"> <li>Median time-to-achieve normal citrulline (<math>\geq 30</math> <math>\mu\text{mol/L}</math>): 79 days post-transplant (n=21)</li> <li>Significantly higher maximum grade of rejection after 14 days post-transplant linked to longer time-to-achieve normal citrulline (<math>p &lt; 0.00001</math>) and not receiving a multivisceral transplant (<math>p = 0.0005</math>)</li> <li>Normalization of citrulline levels did not occur in some cases with moderate-to-severe rejection</li> </ul>                                                                                                                                                                                                                                                                                                                                                                                                                                                                                                                                                                                                                                       |
| 6  | Pappas et al. (2004b)   | <ul style="list-style-type: none"> <li>Aim: To compare serum citrulline concentrations with biopsy-based grades of rejection</li> <li>Sample: 26 isolated intestinal and multivisceral transplant recipients</li> <li>Serum citrulline concentrations determined by ion exchange chromatography and compared to biopsy-based grade of ACR.</li> <li>Other factors recorded: patient and donor age and sex, ischemia time, serum creatinine</li> <li>Straight-line fitting of citrulline levels over time (stepwise linear regression)</li> </ul>                                                                                                                        | <ul style="list-style-type: none"> <li>Time to achieve normal citrulline (<math>&gt;30</math> <math>\mu\text{mol/L}</math>): 1-730 days post-transplant (n = 21) with increasing citrulline levels over time</li> <li>Longer time-to-achieve normal citrulline: independent predictor of maximum acute cellular rejection (<math>p &lt; 0.0001</math>) and average acute cellular rejection (<math>p = 0.0059</math>) 14 days post-transplant.</li> </ul>                                                                                                                                                                                                                                                                                                                                                                                                                                                                                                                                                                                                                                                                                                                     |

| No | Authors                 | Settings (sample and design)                                                                                                                                                                                                                                                                                                                                                                                                                                                                                                                                                                                                      | Main Results                                                                                                                                                                                                                                                                                                                                                                                                                                                                                                                                                                                                                                                                               |
|----|-------------------------|-----------------------------------------------------------------------------------------------------------------------------------------------------------------------------------------------------------------------------------------------------------------------------------------------------------------------------------------------------------------------------------------------------------------------------------------------------------------------------------------------------------------------------------------------------------------------------------------------------------------------------------|--------------------------------------------------------------------------------------------------------------------------------------------------------------------------------------------------------------------------------------------------------------------------------------------------------------------------------------------------------------------------------------------------------------------------------------------------------------------------------------------------------------------------------------------------------------------------------------------------------------------------------------------------------------------------------------------|
| 7  | Yu et al. (2005)        | <ul style="list-style-type: none"> <li>Aim: To investigate correlation between plasma and dried blood spot specimen citrulline concentrations after intestinal transplantation</li> <li>Plasma and dried blood spot samples were analysed by hydrophilic interaction chromatography tandem mass spectrometry</li> <li>Correlation analysed by type of surgery, sonication time, dried blood spot citrulline levels, the time interval between the blood sample collection and assay date</li> </ul>                                                                                                                               | <ul style="list-style-type: none"> <li>Very strong linear correlation between the plasma and dried blood spot citrulline concentrations (<math>r = 0.87</math>, <math>p &lt; 0.001</math>)</li> <li>Correlation was maintained when evaluating only intestinal transplant recipients</li> <li>Sonication time, citrulline concentrations, length of time to assay date: no effect on strength of correlation (<math>p &gt; 0.05</math>)</li> </ul>                                                                                                                                                                                                                                         |
| 8  | David et al. (2006)     | <ul style="list-style-type: none"> <li>Aim: To determine whether serum citrulline level within 30 days of acute rejection could predict rejection episode</li> <li>Comparison of mean citrulline level determined within 30 days of the start of an acute rejection episode against mean citrulline level during a rejection-free period</li> <li>Sample: 22 patients who experienced 37 episodes</li> </ul>                                                                                                                                                                                                                      | <ul style="list-style-type: none"> <li>Mean serum citrulline levels: <ul style="list-style-type: none"> <li>Mild rejection (12 episodes): <math>15.0 \pm 2.3</math> <math>\mu\text{mol/L}</math> (prior) vs <math>18.8 \pm 2.4</math> <math>\mu\text{mol/L}</math> (rejection-free periods) (<math>p = 0.17</math>)</li> <li>Moderate to severe rejection (25 episodes): <math>12.4 \pm 1.1</math> <math>\mu\text{mol/L}</math> (prior) vs <math>18.8 \pm 2.0</math> <math>\mu\text{mol/L}</math> (rejection-free periods) (<math>p = 0.002</math>)</li> </ul> </li> </ul>                                                                                                                 |
| 9  | Gondolesi et al. (2006) | <ul style="list-style-type: none"> <li>Aim: To determine sensitivity and specificity of plasma citrulline as diagnostic tool for allograft injury</li> <li>403 citrulline samples within 24 h of intestinal biopsy in 49 patients</li> <li>Correlation of citrulline with mucosal damage and histopathological diagnoses</li> </ul>                                                                                                                                                                                                                                                                                               | <ul style="list-style-type: none"> <li>Significant mucosal damage vs intestines with no or mild injury: plasma citrulline <math>22.9 \pm 15.4</math> vs <math>38 \pm 23.2</math> <math>\mu\text{mol/L}</math> (<math>p &lt; 0.0001</math>)</li> <li>Sensitivity and specificity of the test were 80% and 58.1% for rejection, and 56.5% and 66% for viral enteritis</li> </ul>                                                                                                                                                                                                                                                                                                             |
| 10 | David et al. (2007)     | <ul style="list-style-type: none"> <li>Aim: to determine citrulline cut-off levels for diagnosis of acute rejection and predictors of citrulline levels post-transplant</li> <li>Dried blood spot citrulline samples from 57 intestinal transplant recipients at or beyond 3 months post-transplant</li> <li>Stepwise linear regression was performed to determine significant predictors patients' citrulline levels</li> </ul>                                                                                                                                                                                                  | <ul style="list-style-type: none"> <li>Seven significant predictors of lower citrulline levels were identified: presence of mild, moderate, or severe acute cellular rejection, presence of bacteraemia or respiratory infection; paediatric age; and time from transplant to sample (<math>p &lt; 0.00001</math>)</li> <li>A cut-off level citrulline <math>13</math> <math>\mu\text{mol/L}</math> had high sensitivity for detecting moderate or severe acute cellular rejection negative predictive value were high (96.4%, 99%, respectively). Specificity was 54% to 74% in children and 83% to 88% in adults.</li> </ul>                                                             |
| 11 | David et al. (2008)     | <ul style="list-style-type: none"> <li>Aim: To determine the significant value of citrulline level in the post-transplant setting, which would correlate with complications of rejection and infection</li> <li>2,135 dried blood spot citrulline samples were obtained from 57 small intestine transplant recipients three months or more after post-transplant</li> </ul>                                                                                                                                                                                                                                                       | <ul style="list-style-type: none"> <li>A cut-off level citrulline <math>13</math> <math>\mu\text{mol/L}</math> had high sensitivity for detecting moderate or severe acute cellular rejection (96.4%)</li> <li>Specificity was high (54%-74% in children and 83%-88% in adults), and the negative predictive value was &gt;99%</li> </ul>                                                                                                                                                                                                                                                                                                                                                  |
| 12 | Ruiz et al. (2010)      | <ul style="list-style-type: none"> <li>Aim: To evaluate the correlation of plasma citrulline and rejection episodes in intestinal transplantation</li> <li>From January 2007 until present, citrulline was measured from small bowel patients and examined for correlation with rejection status of the graft as defined by graft biopsies</li> <li>5195 citrulline samples were analysed</li> </ul>                                                                                                                                                                                                                              | <ul style="list-style-type: none"> <li>Average serum citrulline levels decreased significantly when patients presented a rejection episode <ul style="list-style-type: none"> <li>No rejection: <math>17.38</math> <math>\mu\text{mol/L}</math></li> <li>mild rejection, <math>13.05</math> <math>\mu\text{mol/L}</math></li> <li>moderate rejection, <math>7.98</math> <math>\mu\text{mol/L}</math></li> <li>severe rejection, <math>6.05</math> <math>\mu\text{mol/L}</math></li> </ul> </li> </ul>                                                                                                                                                                                      |
| 13 | Hibi et al. (2012)      | <ul style="list-style-type: none"> <li>Aim: To investigate the association between citrulline levels acute cellular rejection to identify a cut-off point of citrulline that predicts acute cellular rejection beyond 3 months posttransplant in the paediatric patient population.</li> <li>13,499 citrulline samples were prospectively collected from 111 consecutive paediatric intestinal/multivisceral transplant recipients. 2,155 were obtained concurrently with intestinal biopsies (1995-2011)</li> <li>185 acute cellular rejection episodes observed among 74/111 patients (median follow-up: 4.4 years).</li> </ul> | <ul style="list-style-type: none"> <li>Citrulline levels were inversely proportional to the severity of acute cellular rejection.</li> <li>Negative predictive values for any type of acute cellular rejection (cut-off, <math>20</math> <math>\mu\text{mol/L}</math>) and moderate/severe acute cellular rejection (cut-off, <math>10</math> <math>\mu\text{mol/L}</math>) were 95% and 99%, respectively.</li> <li>When patients were divided according to graft size, diagnostic accuracy using the same cut-off was identical.</li> <li>Subgroup analysis by the timing of citrulline measurement prior to biopsy varying from 1 to 7 days demonstrated comparable results.</li> </ul> |

Supplementary Table 3. Studies regarding short bowel syndrome.

| No | Authors                      | Settings (sample and design)                                                                                                                                                                                                                                                                                                                                                                                                                                                                                                                                        | Main Results                                                                                                                                                                                                                                                                                                                                                                                                                                                                                                                                                                                                                                                                                                                                                                                                                                                                   |
|----|------------------------------|---------------------------------------------------------------------------------------------------------------------------------------------------------------------------------------------------------------------------------------------------------------------------------------------------------------------------------------------------------------------------------------------------------------------------------------------------------------------------------------------------------------------------------------------------------------------|--------------------------------------------------------------------------------------------------------------------------------------------------------------------------------------------------------------------------------------------------------------------------------------------------------------------------------------------------------------------------------------------------------------------------------------------------------------------------------------------------------------------------------------------------------------------------------------------------------------------------------------------------------------------------------------------------------------------------------------------------------------------------------------------------------------------------------------------------------------------------------|
| 1  | Crenn et al. (1998); (2000)  | <ul style="list-style-type: none"> <li>57 patients post-absorptive citrulline concentration was measured and parenteral nutrition dependence was used to define permanent (n = 37) and transient (n = 20) intestinal failure</li> <li>Absorptive function, studied over a 3-day period, was evaluated by net digestive absorption for protein and fat</li> <li>Relations between quantitative values were assessed by linear regression analysis and cut-off citrulline threshold, for a diagnosis of intestinal failure by linear discriminant analysis</li> </ul> | <ul style="list-style-type: none"> <li>Short bowel syndrome vs controls (n = 51): <math>20 \pm 13</math> vs. <math>40 \pm 10</math> <math>\mu\text{mol/L}</math> (<math>p &lt; 0.001</math>)</li> <li>Citrulline levels were correlated to small bowel length (<math>p &lt; 0.0001</math>, <math>r = 0.86</math>) and to net digestive absorption of fat, but not to body mass index and creatinine clearance</li> <li>A cut-off level of <math>20 \mu\text{mol/L}</math> classified short bowel patients with permanent intestinal failure with high sensitivity (92%), specificity (90%), positive predictive value (95%), and negative value (86%) and was a more reliable indicator (odds ratio 20.0, 95% CI 1.9-206.1) than anatomic variables (odds ratio 2.9, 95% CI 0.5-15.8) to separate transient from permanent intestinal failure</li> </ul>                       |
| 2  | Pita et al. (2003); (2004)   | <ul style="list-style-type: none"> <li>Sample: 13 short bowel syndrome patients (7 men; <math>60.2 \pm 15.2</math> years)</li> <li>Groups according to remnant bowel length (Group A: 61-150 cm, n =6; Group B: &gt; 60 cm, n =7)</li> <li>Plasma urea-cycle amino acids, ammonium and urinary orotic acid were determined</li> </ul>                                                                                                                                                                                                                               | <ul style="list-style-type: none"> <li>Regarding citrulline, Group B levels were significantly lower vs controls (<math>p &lt; 0.001</math>)</li> <li>Comparisons between patient groups showed higher arginine in Group A (<math>p &lt; 0.05</math>) and non-statistically lower citrulline in Group B</li> </ul>                                                                                                                                                                                                                                                                                                                                                                                                                                                                                                                                                             |
| 3  | Kábrt et al. (2003)          | <ul style="list-style-type: none"> <li>Sample: adult patients with short bowel syndrome (n = 20) <ul style="list-style-type: none"> <li>10 on long-term parenteral nutrition</li> <li>10 not on parenteral nutrition</li> <li>Controls: 9 normal subjects</li> </ul> </li> <li>Nutritional assessment with anthropometry and laboratory parameters</li> <li>Post-absorptive plasma concentrations of amino acids determined by ion exchange chromatography</li> </ul>                                                                                               | <ul style="list-style-type: none"> <li>Total amino acids and non-essential amino acids were same in all groups.</li> <li>Essential amino acid/non-essential amino acid and branched-chain amino acid/total amino acid ratios were significantly lower in the short bowel syndrome patient group than in the normal controls.</li> <li>Concentration of citrulline was significantly lower only in the group of short bowel syndrome patients who had to remain on total parenteral nutrition.</li> </ul>                                                                                                                                                                                                                                                                                                                                                                       |
| 4  | Gong et al. (2005); (2007)   | <ul style="list-style-type: none"> <li>Aim: To investigate the significance of serum citrulline in evaluating the remnant small bowel enterocytes mass and absorptive function in short bowel patients</li> <li>Serum citrulline concentrations were determined using high-performance liquid chromatography in 22 short bowel syndrome patients and 33 healthy controls</li> <li>Five-hour urine D-xylose excretion and digestive protein absorption were measured using high-performance liquid chromatography and micro-Kjeldahl method</li> </ul>               | <ul style="list-style-type: none"> <li>Serum citrulline levels were significantly lower in short bowel syndrome patients compared with healthy controls</li> <li>In short bowel syndrome patients, citrulline correlated with remnant small bowel length (<math>r = 0.82</math>, <math>p &lt; 0.001</math>), surface area (<math>r = 0.86</math>, <math>p &lt; 0.001</math>), 5-h urine D-xylose excretion (<math>r = 0.56</math>, <math>p = 0.007</math>), and digestive protein absorption (<math>r = 0.48</math>, <math>p = 0.046</math>).</li> <li>Citrulline level in six patients receiving rehabilitation therapy correlated with intestinal protein absorption (<math>r = 0.79</math>, <math>p = 0.063</math>) and urine D-xylose excretion (<math>r = 0.81</math>, <math>p = 0.053</math>).</li> </ul>                                                                |
| 5  | Rhoads et al. (2005)         | <ul style="list-style-type: none"> <li>Aim: To determine whether serum citrulline levels correlate with total parenteral nutrition independence in children with short bowel syndrome</li> <li>Study design: serum amino acid profiles over a 24-month interval from all infants with short bowel syndrome 3 weeks to 4 years of age.</li> <li>Remaining small intestine length was recorded at surgery, and % of enteral calories tolerated was determined in 24 infants with short bowel syndrome and 21 age-matched controls</li> </ul>                          | <ul style="list-style-type: none"> <li>In patients with short bowel syndrome, serum citrulline correlated linearly with tolerated enteral calories (<math>r = 0.85</math>, <math>p &lt; 0.001</math>) and bowel length (<math>r = 0.47</math>, <math>p &lt; 0.03</math>)</li> <li>A citrulline cut-off level of <math>19 \mu\text{mol/L}</math> had 94% sensitivity and 67% parenteral nutrition independence.</li> <li>Mean citrulline levels: <ul style="list-style-type: none"> <li>short bowel syndrome weaned off parenteral nutrition: <math>30 \pm 2 \mu\text{mol/L}</math></li> <li>short bowel syndrome subsequently weaned off parenteral nutrition: <math>20 \pm 2 \mu\text{mol/L}</math></li> <li>short bowel syndrome parenteral nutrition: <math>11 \pm 2 \mu\text{mol/L}</math></li> <li>Controls: <math>31 \pm 2 \mu\text{mol/L}</math></li> </ul> </li> </ul> |
| 6  | Luo et al. (2007)            | <ul style="list-style-type: none"> <li>Aim: To examine whether plasma citrulline and glutamine concentrations are biomarkers of residual small intestinal length and nutrient absorptive functions in adult short bowel syndrome patients</li> <li>Sample: 24 patients on parenteral nutrition in a double-blind, randomized trial of individualized dietary modification <math>\pm</math> recombinant human growth hormone</li> <li>intestinal absorption studies and plasma measurements of citrulline and glutamine were performed</li> </ul>                    | <ul style="list-style-type: none"> <li>Residual small bowel length was positively correlated with baseline plasma citrulline (<math>r = 0.467</math>, <math>p = 0.028</math>)</li> <li>No significant correlations between absolute citrulline and glutamine concentrations and the percent absorption of nutrient substrates at any time point were observed.</li> <li>No correlation between the change in citrulline and glutamine concentration and the change in % nutrient absorption was observed</li> </ul>                                                                                                                                                                                                                                                                                                                                                            |
| 7  | Nion-Larmurier et al. (2007) | <ul style="list-style-type: none"> <li>Twenty-three patients who had a bowel resection and a provisional ileostomy were studied in the month before and months after recovery</li> <li>Basal citrulline levels were measured before and after restoration of continuity on 16 operated patients and prospectively in 7.</li> </ul>                                                                                                                                                                                                                                  | <ul style="list-style-type: none"> <li>Citrulline levels (mean <math>\pm</math> SD) before recovery were <math>20.9 \pm 8.6 \mu\text{mol/L}</math> (n = 23)</li> <li>Citrulline levels correlated to the length of bowel length (<math>r = 0.83</math>; <math>p = 0.002</math>)</li> </ul>                                                                                                                                                                                                                                                                                                                                                                                                                                                                                                                                                                                     |



| No | Authors                                     | Settings (sample and design)                                                                                                                                                                                                                                                                                                                                                                                                                                                                                                                                                                                                                                                                                                                                     | Main Results                                                                                                                                                                                                                                                                                                                                                                                                                                                                                                                                                                                                                                                                                                                                                                                                                                                                                                                                                                                                                                                                                                                                                                              |
|----|---------------------------------------------|------------------------------------------------------------------------------------------------------------------------------------------------------------------------------------------------------------------------------------------------------------------------------------------------------------------------------------------------------------------------------------------------------------------------------------------------------------------------------------------------------------------------------------------------------------------------------------------------------------------------------------------------------------------------------------------------------------------------------------------------------------------|-------------------------------------------------------------------------------------------------------------------------------------------------------------------------------------------------------------------------------------------------------------------------------------------------------------------------------------------------------------------------------------------------------------------------------------------------------------------------------------------------------------------------------------------------------------------------------------------------------------------------------------------------------------------------------------------------------------------------------------------------------------------------------------------------------------------------------------------------------------------------------------------------------------------------------------------------------------------------------------------------------------------------------------------------------------------------------------------------------------------------------------------------------------------------------------------|
| 8  | Papadia et al. (2006a); (2006b; 2007)       | <ul style="list-style-type: none"> <li>Sample: (a) Crohn's disease with massive small bowel resection leaving &lt; 50 cm (n = 6), (b) Crohn's disease with 50-150 cm remaining (n = 9), (c) Crohn's disease with no resection but active inflammation (n = 7), (d) Crohn's disease without resection or active inflammation (n = 9), (e) mesenteric infarction with resection leaving &lt; 50 cm (n = 6), (f) mesenteric infarction leaving 50-150 cm (n= 6), (g) active coeliac disease (n = 6), (h) healthy volunteers (n = 6).</li> <li>Post-absorptive fasting plasma citrulline was measured using reverse-phase, high performance liquid chromatography. Absorptive capacity and permeability were also measured after oral sugar-mix ingestion</li> </ul> | <ul style="list-style-type: none"> <li>Plasma citrulline strongly correlated with small bowel length (<math>p &lt; 0.0001</math>) and xylose absorption (<math>p &lt; 0.001</math>)</li> <li>No correlation was found with C-reactive protein, permeability, albumin, sedimentation rate, white cell count, or platelet count.</li> <li>Citrulline levels in Crohn's disease and mesenteric infarction with small bowel length 50-150 cm vs less than 50 cm: <math>21.0</math> vs <math>9.2</math> <math>\mu\text{mol/L}</math> (<math>p &lt; 0.0004</math>), respectively</li> </ul>                                                                                                                                                                                                                                                                                                                                                                                                                                                                                                                                                                                                     |
| 9  | Peters et al. (2007b); (2007a; 2007c; 2008) | <ul style="list-style-type: none"> <li>Aim: to explore diagnostic value of fasting citrulline concentrations to detect decreased intestinal energy absorption in patients with recently diagnosed coeliac disease (n=15), refractory coeliac disease (n = 9) and short bowel syndrome (n = 16)</li> <li>Fasting plasma citrulline concentrations were determined by high performance liquid chromatography in 40 adult patients and 21 healthy subjects.</li> <li>Intestinal energy absorption capacity using bomb calorimetry was determined</li> </ul>                                                                                                                                                                                                         | <ul style="list-style-type: none"> <li>Mean citrulline levels: <ul style="list-style-type: none"> <li>Refractory celiac disease vs healthy subjects: <math>28.5 \pm 9.9</math> vs <math>38.1 \pm 8.0</math> <math>\mu\text{mol/L}</math>, <math>p &lt; 0.05</math></li> <li>Coeliac disease vs healthy subjects <math>28.5 \pm 9.9</math> vs <math>38.1 \pm 6.4</math> <math>\mu\text{mol/L}</math>, <math>p &lt; 0.05</math></li> </ul> </li> <li>Mean intestinal energy absorption capacity: <ul style="list-style-type: none"> <li>Short bowel syndrome patients vs healthy subjects: <math>64.3 \pm 18.2</math> vs <math>90.3 \pm 3.5\%</math>, <math>p &lt; 0.001</math></li> <li>Refractory celiac disease vs healthy subjects: <math>64.3 \pm 18.2</math> vs <math>82.3 \pm 11.7\%</math>, <math>p &lt; 0.01</math></li> <li>Coeliac disease vs healthy subjects <math>64.3 \pm 18.2</math> vs <math>89.2 \pm 3.4\%</math>, <math>p &lt; 0.001</math></li> </ul> </li> <li>No relation was observed between fasting plasma citrulline concentration and intestinal energy absorption capacity (<math>r=0.09</math>, <math>P=0.56</math>, area under the ROC curve 0.50)</li> </ul> |
| 10 | Parekh et al. (2008)                        | <ul style="list-style-type: none"> <li>Sample: 49 healthy controls with an intact gastrointestinal tract and no known metabolic or digestive diseases and 30 short bowel syndrome (&lt; 200cm small bowel) patients dependent on parenteral</li> <li>Venous post-absorptive plasma amino acid concentrations were measured in all subjects after an 8 hour fast</li> </ul>                                                                                                                                                                                                                                                                                                                                                                                       | <ul style="list-style-type: none"> <li>Mean citrulline levels: Short bowel syndrome patients vs healthy controls: <math>21.4</math> vs <math>33.2</math> <math>\mu\text{mol/L}</math> <math>p = 0.0002</math></li> <li>Area under the ROC curve was 0.82 (95% CI: 0.71, 0.93) and a citrulline cut-off of 20 <math>\mu\text{mol/L}</math> had 100% specificity and 56.6% sensitivity.</li> <li>Citrulline increased by 1.65 <math>\mu\text{mol/L}</math> with every 5 year increase in age (<math>p = 0.044</math>)</li> <li>Citrulline increased by 4.9 <math>\mu\text{mol/L}</math> for every 50cm increase in small bowel length (<math>p = 0.018</math>)</li> <li>Citrulline decreased by 9 <math>\mu\text{mol/L}</math> for every 1000 kcal/day increase in parenteral nutrition (<math>p &lt; 0.0001</math>)</li> </ul>                                                                                                                                                                                                                                                                                                                                                             |
| 13 | Santarpia et al. (2008)                     | <ul style="list-style-type: none"> <li>Sample: 25 patients with short bowel syndrome after at least 18 months since last digestive circuit modification; 24 of them were again evaluated 1 year later.</li> <li>Ten patients were weaned off parenteral nutrition and 15 were dependent on parenteral nutrition.</li> <li>Fifty-four healthy volunteers (28 women and 26 men) served as controls.</li> </ul>                                                                                                                                                                                                                                                                                                                                                     | <ul style="list-style-type: none"> <li>Five amino acids (citrulline, leucine, isoleucine, valine and tyrosine) were significantly lower in all short bowel syndrome patients versus controls, whereas glutamine was significantly higher.</li> <li>Only serum citrulline measured was significantly related to small bowel length.</li> </ul>                                                                                                                                                                                                                                                                                                                                                                                                                                                                                                                                                                                                                                                                                                                                                                                                                                             |
| 14 | Bailly-Botuha et al. (2009)                 | <ul style="list-style-type: none"> <li>Prospective plasma citrulline assays were performed in 31 children with short bowel syndrome</li> <li>Median age was 16 months and median follow-up was 14 months</li> </ul>                                                                                                                                                                                                                                                                                                                                                                                                                                                                                                                                              | <ul style="list-style-type: none"> <li>Plasma citrulline at inclusion showed a positive correlation with residual short bowel length.</li> <li>Follow-up values correlated negatively with intestinal failure severity.</li> <li>Plasma citrulline increased over time during or after weaning from parenteral nutrition (from <math>15.8 \pm 11.5</math> <math>\mu\text{mol/L}</math> to <math>19.3 \pm 3.8</math> <math>\mu\text{mol/L}</math>) but remained stable and low in patients who continued on parenteral nutrition (<math>6.5 \pm 3.0</math> <math>\mu\text{mol/L}</math> at inclusion and <math>7.7 \pm 6.0</math> <math>\mu\text{mol/L}</math> at last follow-up).</li> </ul>                                                                                                                                                                                                                                                                                                                                                                                                                                                                                              |
| 15 | Fitzgibbons et al. (2009)                   | <ul style="list-style-type: none"> <li>Aim: To evaluate the relationship between citrulline and parenteral nutrition independence in children with short bowel syndrome</li> <li>Sample: Retrospective review of all patients in a multidisciplinary paediatric intestinal rehabilitation clinic with a recorded citrulline between January 2005 and December 2007 (n = 27)</li> </ul>                                                                                                                                                                                                                                                                                                                                                                           | <ul style="list-style-type: none"> <li>Citrulline levels correlated positively with bowel length (<math>r = 0.73</math>; <math>p &lt; 0.0001</math>) and were a strong predictor of parenteral nutrition independence (<math>p = 0.002</math>; area under the ROC curve = 0.88; 95% CI 0.75-1.00).</li> <li>Optimal citrulline cut-off point distinguishing patients who reached parenteral nutrition independence was 15 <math>\mu\text{mol/L}</math> (sensitivity = 89%; specificity = 78%).</li> </ul>                                                                                                                                                                                                                                                                                                                                                                                                                                                                                                                                                                                                                                                                                 |
| 16 | Gong et al. (2009)                          | <ul style="list-style-type: none"> <li>Aim: To evaluate long-term clinical significance of enteral nutrition in weaning adult short bowel patients off parenteral nutrition undergoing intestinal rehabilitation therapy</li> <li>Sample: 61 adult patients with small bowel length <math>47.95 \pm 19.37</math> cm were retrospectively analysed</li> </ul>                                                                                                                                                                                                                                                                                                                                                                                                     | <ul style="list-style-type: none"> <li>Nutritional and anthropometric parameters, urine 5-hr D-xylose excretion and serum citrulline levels all increased significantly after intestinal rehabilitation therapy and on follow-up compared with baseline</li> </ul>                                                                                                                                                                                                                                                                                                                                                                                                                                                                                                                                                                                                                                                                                                                                                                                                                                                                                                                        |

| No | Authors                                                       | Settings (sample and design)                                                                                                                                                                                                                                                                                                                                                                                                                                                                                                                                                                                  | Main Results                                                                                                                                                                                                                                                                                                                                                                                                                                                                                                                                                                                                                                                                                                                                                                                                                                                                                                                                                                                            |
|----|---------------------------------------------------------------|---------------------------------------------------------------------------------------------------------------------------------------------------------------------------------------------------------------------------------------------------------------------------------------------------------------------------------------------------------------------------------------------------------------------------------------------------------------------------------------------------------------------------------------------------------------------------------------------------------------|---------------------------------------------------------------------------------------------------------------------------------------------------------------------------------------------------------------------------------------------------------------------------------------------------------------------------------------------------------------------------------------------------------------------------------------------------------------------------------------------------------------------------------------------------------------------------------------------------------------------------------------------------------------------------------------------------------------------------------------------------------------------------------------------------------------------------------------------------------------------------------------------------------------------------------------------------------------------------------------------------------|
| 17 | Picot et al. (2010)                                           | <ul style="list-style-type: none"> <li>Twenty-six patients with small bowel disruption and double enterostomy were treated with chyme reperfusion</li> <li>Faecal wet weight, nitrogen and fat absorption, parenteral nutrition delivery and citrulline were measured before and after the initiation of chyme reperfusion with a median follow-up of 30 days.</li> </ul>                                                                                                                                                                                                                                     | <ul style="list-style-type: none"> <li>Chyme reperfusion decreased the intestinal wet weight output and parenteral nutrition dependence</li> <li>Chyme reperfusion was associated with a rise in net nitrogen and fat digestive absorption and citrulline (<math>17.0 \pm 10.0</math> vs <math>31.0 \pm 12.0</math> <math>\mu\text{mol/L}</math>, <math>p = 0.0001</math>).</li> <li>Before the initiation of chyme reperfusion, citrulline levels correlated positively with the absorptive post-duodenal small bowel length (<math>r = 0.39</math>, <math>p = 0.04</math>), but not with the total post-duodenal small bowel length (<math>r = 0.11</math>, <math>P = 0.60</math>).</li> </ul>                                                                                                                                                                                                                                                                                                        |
| 18 | Noto et al. (2008a); (2008b); Diamanti et al. (2010); (2011b) | <ul style="list-style-type: none"> <li>Sample: Between March 2005 and March 2010, 28 short bowel syndrome patients on parenteral nutrition</li> <li>Citrulline levels and enteral intake determinations were measured on inclusion and at 6-month intervals</li> </ul>                                                                                                                                                                                                                                                                                                                                        | <ul style="list-style-type: none"> <li>Citrulline significantly correlated with the residual duodenum-jejunum length (<math>r^2 = 0.22</math>, <math>p = 0.0113</math>) and with enteral intake (<math>r^2 = 0.20</math>, <math>p = 0.016</math>, <math>r^2 = 0.48</math>, <math>p = 0.0001</math>)</li> <li>Baseline citrulline over <math>10</math> <math>\mu\text{mol/L}</math> and a longitudinal increase <math>&gt;25\%</math> provided a weak association with bowel adaptation (likelihood ratios 2.6 and 2.4, respectively), unlike residual small bowel length <math>\geq 20</math> cm and the presence of <math>&gt; 50\%</math> of the colon.</li> </ul>                                                                                                                                                                                                                                                                                                                                    |
| 19 | Khan et al. (2011)                                            | <ul style="list-style-type: none"> <li>Sample: Serum citrulline was measured in 19 subjects with short bowel syndrome; 10 females and 17 were on parenteral nutrition</li> <li>Age: 7 months to 21 years; Bowel length: 5 to 150 cm, and percentage of parenteral nutrition providing 0-100% of caloric intake.</li> </ul>                                                                                                                                                                                                                                                                                    | <ul style="list-style-type: none"> <li>Citrulline levels decreased with increased parenteral nutrition intake (<math>r = 0.69</math>)</li> <li>Citrulline levels correlated with bowel length (<math>r = 0.73</math>)</li> </ul>                                                                                                                                                                                                                                                                                                                                                                                                                                                                                                                                                                                                                                                                                                                                                                        |
| 20 | Pironi et al. (2005); (2011; 2012)                            | <ul style="list-style-type: none"> <li>Sample: Nineteen healthy subjects and 93 short bowel syndrome patients were studied, 67 on home parenteral nutrition and 26 stable on oral diet</li> </ul>                                                                                                                                                                                                                                                                                                                                                                                                             | <ul style="list-style-type: none"> <li>Mean citrulline levels:</li> <li>Healthy subjects: <math>37</math> <math>\mu\text{mol/L}</math></li> <li>Short bowel syndrome patients on oral diet: <math>33</math> <math>\mu\text{mol/L}</math></li> <li>Short bowel syndrome patients on home parenteral nutrition <math>20</math> <math>\mu\text{mol/L}</math> (<math>p &lt; 0.001</math>).</li> <li>Citrulline cut-off of <math>14</math> <math>\mu\text{mol/L}</math> had sensitivity 49%, specificity 100%, <math>p &lt; 0.001</math>; for distinguishing between short bowel syndrome on parenteral nutrition vs oral diet</li> </ul>                                                                                                                                                                                                                                                                                                                                                                    |
| 21 | Raphael et al. (2011)                                         | <ul style="list-style-type: none"> <li>Design: Open-labelled pilot study in a limited access program for cisapride.</li> <li>Indications were short bowel syndrome with underlying dysmotility and difficulty advancing enteral feeds despite standard therapies and without evidence of anatomic obstruction.</li> <li>Patients received cisapride <math>0.1</math> to <math>0.2</math> mg/kg per dose for 3 to 4 doses per day.</li> </ul>                                                                                                                                                                  | <ul style="list-style-type: none"> <li>Ten patients were enrolled in a multidisciplinary paediatric intestinal rehabilitation program.</li> <li>Median (IQR) residual bowel length was <math>102</math> (<math>85</math>-<math>130</math>) cm. Median (IQR) citrulline level was <math>14.5</math> (<math>10.5</math>-<math>31.3</math>) <math>\mu\text{mol/L}</math>.</li> <li>Seven patients improved in enteral tolerance during treatment and 2 were weaned completely from parenteral nutrition.</li> </ul>                                                                                                                                                                                                                                                                                                                                                                                                                                                                                        |
| 22 | Suzuki et al. (2012)                                          | <ul style="list-style-type: none"> <li>Design: To measure plasma citrulline in six patients with intestinal dysfunction who were in the acute and chronic phase for more than 6 months.</li> </ul>                                                                                                                                                                                                                                                                                                                                                                                                            | <ul style="list-style-type: none"> <li>Four patients out of six could be withdrawn from total parenteral nutrition, and their plasma citrulline level increased up to <math>15</math> <math>\mu\text{mol/L}</math></li> <li>Two patients, who could not be withdrawn from parenteral nutrition, showed very low levels of plasma citrulline throughout the treatment course (under <math>15</math> <math>\mu\text{mol/L}</math>)</li> </ul>                                                                                                                                                                                                                                                                                                                                                                                                                                                                                                                                                             |
| 23 | Amiot et al. (2013)                                           | <ul style="list-style-type: none"> <li>Sample: 268 non-malignant short bowel syndrome patients</li> <li>Home parenteral nutrition dependence and survival rate were studied with univariate and multivariate analysis.</li> </ul>                                                                                                                                                                                                                                                                                                                                                                             | <ul style="list-style-type: none"> <li>Home parenteral nutrition dependence was significantly decreased with an early (<math>&lt;6</math> months) plasma citrulline concentration <math>&gt;20</math> <math>\mu\text{mol/L}</math>, a remaining colon <math>&gt;57\%</math> and a remnant small bowel length <math>&gt;75</math> cm</li> </ul>                                                                                                                                                                                                                                                                                                                                                                                                                                                                                                                                                                                                                                                          |
| 24 | Pinto Costa et al. (2013)                                     | <ul style="list-style-type: none"> <li>Sample: Case-control study, 11 patients with short bowel syndrome, 13 patients submitted to malabsorptive bariatric surgery and 11 healthy controls.</li> <li>Plasma levels of amino acids were determined, before and after a stimulation test with oral L-glutamine, by ion exchange chromatography.</li> </ul>                                                                                                                                                                                                                                                      | <ul style="list-style-type: none"> <li>Citrulline levels were lower in short bowel patients (<math>28.6 \pm 11.3</math> vs <math>35.5 \pm 11</math> in operated obese vs <math>32.2 \pm 6.6</math> <math>\mu\text{mol/L}</math> in controls; <math>p &gt; 0.05</math>) and lower than <math>25.5</math> <math>\mu\text{mol/L}</math> in 54.5% of them</li> <li>Relative variation of citrulline levels at the 80th minute of test was lower in short bowel patients with high predictive capacity of a short bowel <math>\leq 50</math> cm (area under ROC curve = <math>0.823</math>; <math>p = 0.038</math>).</li> </ul>                                                                                                                                                                                                                                                                                                                                                                              |
| 25 | Vecino Lopez et al. (2013)                                    | <ul style="list-style-type: none"> <li>Plasma citrulline concentration was determined by chromatography in 57 patients (age 0.5-18 years) admitted to the Intestinal Rehabilitation Unit with intestinal failure.</li> <li>Group I: short bowel syndrome totally dependent on parenteral nutrition</li> <li>Group II: short bowel syndrome under mixed enteral-parenteral nutrition</li> <li>Group III: Intestinal failure weaned off parenteral nutrition after a rehabilitation period</li> <li>Group IV: small bowel transplanted patients weaned off parenteral nutrition and on a normal diet</li> </ul> | <ul style="list-style-type: none"> <li>Mean plasma citrulline levels: <ul style="list-style-type: none"> <li>Group I (<math>n = 15</math>): <math>7.1 \pm 4.1</math> <math>\mu\text{mol/L}</math></li> <li>Group II (<math>n = 11</math>): <math>15.8 \pm 8.9</math> <math>\mu\text{mol/L}</math></li> <li>Group III (<math>n = 13</math>): <math>20.6 \pm 7.5</math> <math>\mu\text{mol/L}</math></li> <li>Group IV (<math>n = 25</math>): <math>28.8 \pm 10.1</math> <math>\mu\text{mol/L}</math></li> </ul> </li> <li>Values were significantly lower in group I compared to groups II-IV (<math>p &lt; 0.001</math>), and in group II compared to groups III-IV (<math>p &lt; 0.001</math>). Citrulline was correlated with remnant small bowel length (<math>r = 0.85</math>, <math>p &lt; 0.05</math>).</li> <li>In group IV citrulline levels decreased <math>&gt;50\%</math> in 3 patients who developed moderate-severe rejection, and in one patient who developed viral enteritis</li> </ul> |

### Teduglutide studies

| No | Authors                                                                     | Settings (sample and design)                                                                                                                                                                                                                                                                                                                                                                                                 | Main Results                                                                                                                                                                                                                                                                                                                                                                                                                                                                                                                     |
|----|-----------------------------------------------------------------------------|------------------------------------------------------------------------------------------------------------------------------------------------------------------------------------------------------------------------------------------------------------------------------------------------------------------------------------------------------------------------------------------------------------------------------|----------------------------------------------------------------------------------------------------------------------------------------------------------------------------------------------------------------------------------------------------------------------------------------------------------------------------------------------------------------------------------------------------------------------------------------------------------------------------------------------------------------------------------|
| 1  | Buchman et al. (2010)                                                       | <ul style="list-style-type: none"> <li>Design: Subjects with moderate-to-severe Crohn's disease randomized to placebo or 1 of 3 doses of teduglutide (0.05, 0.10, or 0.20 mg/kg daily) (n = 100)</li> <li>Primary outcome: the percentage of subjects in each group that responded to treatment, defined as a decrease in Crohn's Disease Activity Index score</li> </ul>                                                    | <ul style="list-style-type: none"> <li>Mean baseline Crohn's Disease Activity Index score was <math>290.8 \pm 57.6</math>, similar across groups</li> <li>Plasma citrulline was similar across groups at baseline, but increased substantially over time in all teduglutide groups when compared with placebo at week 8</li> </ul>                                                                                                                                                                                               |
| 2  | Jeppesen et al. (2011); Seidner et al. (2015)                               | <ul style="list-style-type: none"> <li>Sample: 83 patients randomised to receive subcutaneous teduglutide 0.10 mg/kg/day (n = 32), 0.05 mg/kg/day (n = 35) or placebo (n = 16) once daily</li> <li>Responders were subjects who demonstrated reductions of <math>\geq 20\%</math> in parenteral volumes from baseline at weeks 20 and 24</li> </ul>                                                                          | <ul style="list-style-type: none"> <li>Three teduglutide-treated patients were completely weaned off parenteral support.</li> <li>Villus height, plasma citrulline concentration and lean body mass were significantly increased with teduglutide compared with placebo</li> </ul>                                                                                                                                                                                                                                               |
| 3  | Gilroy et al. (2009); Jeppesen et al. (2009); (2012); Seidner et al. (2015) | <ul style="list-style-type: none"> <li>24-week study of short bowel syndrome patients who were given subcutaneous teduglutide (0.05 mg/kg/d; n = 43) or placebo (n = 43) once daily.</li> <li>Parenteral support was reduced if 48-hour urine volumes exceeded baseline values by <math>\geq 10\%</math></li> <li>The primary efficacy end point was number of responders</li> </ul>                                         | <ul style="list-style-type: none"> <li>There were significantly more responders in the teduglutide group (27/43) than the placebo group (13/43, <math>p = 0.002</math>).</li> <li>At week 24, the mean reduction in parenteral support volume in the teduglutide group was <math>4.4 \pm 3.8</math> L/week compared with <math>2.3 \pm 2.7</math> L/week in the placebo group (<math>p &lt; 0.001</math>).</li> <li>Teduglutide increased plasma concentrations of citrulline, a biomarker of mucosal mass.</li> </ul>           |
| 4  | Naimi et al. (2013)                                                         | <ul style="list-style-type: none"> <li>Sample: Eight short bowel syndrome patients (5 Females, <math>60 \pm 7</math> years; remnant small bowel <math>111 \pm 62</math> cm)</li> <li>Design: open-label, sequential study comparing continuous GLP-2 vs three times per day GLP-2</li> <li>Post-absorptive plasma citrulline, reflecting enterocyte mass, was measured by high performance liquid chromatography.</li> </ul> | <ul style="list-style-type: none"> <li>Both GLP-2 dosing regimens reduced diarrhoea and increased wet weight absorption</li> <li>Significant increases in plasma citrulline (continuous GLP-2: <math>7.5 \pm 7</math> <math>\mu\text{mol/L}</math> and three times per day GLP-2: <math>12.7 \pm 8</math> <math>\mu\text{mol/L}</math>; <math>p = 0.001</math>) suggesting intestinotrophic effects in relation to GLP-2 treatment, are followed by increases in relative absorption of energy, carbohydrate and fat.</li> </ul> |

Supplementary Table 4. Coeliac disease, Crohn's disease and enteropathy studies.

| No | Authors                                         | Settings (sample and design)                                                                                                                                                                                                                                                                                                                                                                                                                                                                                                                                                                                                                                                                                                                                                        | Main Results                                                                                                                                                                                                                                                                                                                                                                                                                                                                                                                                                                                                                                                                                                                                                                                                                                                                              |
|----|-------------------------------------------------|-------------------------------------------------------------------------------------------------------------------------------------------------------------------------------------------------------------------------------------------------------------------------------------------------------------------------------------------------------------------------------------------------------------------------------------------------------------------------------------------------------------------------------------------------------------------------------------------------------------------------------------------------------------------------------------------------------------------------------------------------------------------------------------|-------------------------------------------------------------------------------------------------------------------------------------------------------------------------------------------------------------------------------------------------------------------------------------------------------------------------------------------------------------------------------------------------------------------------------------------------------------------------------------------------------------------------------------------------------------------------------------------------------------------------------------------------------------------------------------------------------------------------------------------------------------------------------------------------------------------------------------------------------------------------------------------|
| 1  | Crenn et al. (2003)                             | <ul style="list-style-type: none"> <li>Aim: To evaluate citrulline as a marker of severity and extent of villous atrophy in patients without intestinal resection.</li> <li>Sample: <ul style="list-style-type: none"> <li>42 patients with coeliac disease and 10 patients with non-coeliac villous atrophy disease were studied by plasma postabsorptive citrulline and biological dosages, biopsies of proximal (duodenojejunal) small bowel and distal ileum (n = 25), or measurement of vitamin B12 absorption (n = 4).</li> <li>9 patients were re-evaluated after following a gluten-free diet for 1 year</li> <li>Controls: 51 healthy subjects and 10 severely malnourished patients with anorexia nervosa with no intestinal mucosal abnormalities</li> </ul> </li> </ul> | <ul style="list-style-type: none"> <li>Plasma citrulline concentrations: Villous atrophy vs healthy subjects: 24 vs 40 μmol/L, p &lt; 0.001</li> <li>Three cut-offs identifies: &lt;10 μmol/L for patients with diffuse total villous atrophy, 10-20 μmol/L for patients with proximal-only total villous atrophy, and 20-30 μmol/L for patients with partial villous atrophy</li> <li>Plasma citrulline concentration was correlated to the severity and extent of villous atrophy (r = 0.81; p &lt; 0.001) and to albumin levels (r = 0.47; p &lt; 0.01).</li> <li>Receiver operating characteristic curves indicated that plasma citrulline concentration was the best biological variable to predict villous atrophy</li> <li>Following a 1-year gluten-free diet, plasma citrulline concentration increased in histologically responsive but not in unresponsive patients</li> </ul> |
| 2  | Hozyasz et al. (2006)                           | <ul style="list-style-type: none"> <li>Aim: To determine amino acid concentrations in coeliac disease patients on gluten-free diet and gluten-containing diet</li> <li>Sample: 61 patients with coeliac disease</li> <li>Whole blood citrulline were determined in dried blood spots by tandem mass spectrometry</li> </ul>                                                                                                                                                                                                                                                                                                                                                                                                                                                         | <ul style="list-style-type: none"> <li>Mean citrulline levels were higher in patients on strict gluten-free diet comparing to those newly diagnosed (32.2 ± 8.7 vs 24.9 ± 5.7 μmol/L; p=0.025)</li> </ul>                                                                                                                                                                                                                                                                                                                                                                                                                                                                                                                                                                                                                                                                                 |
| 3  | Papadia et al. (2006a); (2006b); (2007)         | <ul style="list-style-type: none"> <li>See Supplementary Table 3 for details</li> </ul>                                                                                                                                                                                                                                                                                                                                                                                                                                                                                                                                                                                                                                                                                             |                                                                                                                                                                                                                                                                                                                                                                                                                                                                                                                                                                                                                                                                                                                                                                                                                                                                                           |
| 4  | Peters et al. (2007b); (2007a); (2007c); (2008) | <ul style="list-style-type: none"> <li>See Supplementary Table 3 for details</li> </ul>                                                                                                                                                                                                                                                                                                                                                                                                                                                                                                                                                                                                                                                                                             |                                                                                                                                                                                                                                                                                                                                                                                                                                                                                                                                                                                                                                                                                                                                                                                                                                                                                           |
| 5  | Miceli et al. (2008)                            | <ul style="list-style-type: none"> <li>Sample: 50 healthy volunteers, 21 patients with untreated coeliac disease and 6 patients with refractory coeliac disease</li> <li>Serum citrulline levels and duodenal lesions were evaluated at the time of diagnosis, and after at least 24 months of gluten-free diet</li> <li>Serum citrulline concentrations were determined by ion exchange chromatography.</li> </ul>                                                                                                                                                                                                                                                                                                                                                                 | <ul style="list-style-type: none"> <li>In comparison to healthy volunteers, serum citrulline concentrations were significantly lower in untreated and refractory coeliac disease patients</li> <li>No significant difference was found between untreated and refractory coeliac disease patients and between patients with different patterns of clinical presentation or various degrees of duodenal lesions</li> <li>After a gluten-free diet, mean serum citrulline concentration increased</li> </ul>                                                                                                                                                                                                                                                                                                                                                                                 |
| 6  | Crenn et al. (2009a); (2009b)                   | <ul style="list-style-type: none"> <li>Sample: 6 groups of HIV patients (n = 115): 1) undetectable viral load without chronic diarrhoea (a; n = 40) and with protease inhibitor-associated toxic chronic diarrhoea (b; n = 26), 2) detectable viral load and CD4 &gt; 200/mm<sup>3</sup> without (a; n = 6) and with (b; n = 11) chronic diarrhoea, and 3) detectable viral load and CD4 &lt; 200/mm<sup>3</sup> without chronic diarrhoea (a; n = 7) and with opportunistic intestinal infections or HIV enteropathy (b; n = 25)</li> <li>The influence of diarrhoea on citrulline was assessed by comparing subgroups a and b with healthy control subjects (n = 100).</li> </ul>                                                                                                 | <ul style="list-style-type: none"> <li>Citrulline was slightly decreased (22-30 μmol/L) in groups 1b and 2b</li> <li>Citrulline levels in control subjects vs patients without chronic diarrhoea (groups 1a, 2a, and 3a): 38 ± 8 vs 36 ± 6 μmol/L</li> <li>In group 3b, a citrulline concentration &lt;10 μmol/L was associated with a clinical indication for parenteral nutrition (p &lt; 0.05).</li> <li>Citrulline correlated positively with albumin (p &lt; 0.01) and BMI (p &lt; 0.05) and negatively with C-reactive protein (p &lt; 0.01).</li> <li>When anti-infectious and nutritional therapies were successful, citrulline normalized in 2-12 weeks</li> </ul>                                                                                                                                                                                                               |
| 7  | Papadia et al. (2009a); (2009b); (2010)         | <ul style="list-style-type: none"> <li>Post-absorptive fasting serum citrulline was measured in 150 tropical enteropathy patients (n = 44, HIV) with reverse phase, high performance liquid chromatography.</li> <li>Absorptive capacity and permeability were measured after intrajejunal instillation of 4 sugars with assay by thin-layer chromatography.</li> <li>Morphometric analysis was carried out on jejunal biopsies</li> </ul>                                                                                                                                                                                                                                                                                                                                          | <ul style="list-style-type: none"> <li>HIV positive vs HIV negative patients: median serum citrulline 19 (17-24) vs 27 (23-33) μmol/L; p &lt; 0.001</li> <li>There were statistically significant correlations (p &lt; 0.005) between citrulline and: crypt depth; villous height/crypt depth ratio; Shenk-Klipstein score; and xylose absorption, only in the HIV positive</li> </ul>                                                                                                                                                                                                                                                                                                                                                                                                                                                                                                    |

| No | Authors                                        | Settings (sample and design)                                                                                                                                                                                                                                                                                                                                                                                                                                                                                                                              | Main Results                                                                                                                                                                                                                                                                                                                                                                                                                                                                                                                                                                                                                                                                                                                                                                                                                                                                                                                                                                                                                                                                                                                               |
|----|------------------------------------------------|-----------------------------------------------------------------------------------------------------------------------------------------------------------------------------------------------------------------------------------------------------------------------------------------------------------------------------------------------------------------------------------------------------------------------------------------------------------------------------------------------------------------------------------------------------------|--------------------------------------------------------------------------------------------------------------------------------------------------------------------------------------------------------------------------------------------------------------------------------------------------------------------------------------------------------------------------------------------------------------------------------------------------------------------------------------------------------------------------------------------------------------------------------------------------------------------------------------------------------------------------------------------------------------------------------------------------------------------------------------------------------------------------------------------------------------------------------------------------------------------------------------------------------------------------------------------------------------------------------------------------------------------------------------------------------------------------------------------|
| 8  | Panetta et al. (2010); Diamanti et al. (2011a) | <ul style="list-style-type: none"> <li>Sample: 31 Crohn's disease patients and 44 controls (2008-2010)</li> <li>Analysis: Differences between groups, at baseline, in plasma citrulline and glutamine and between their baseline and final values during the prospective survey, and correlation between baseline values of citrulline and duration of disease, C-reactive protein, and faecal calprotectin</li> </ul>                                                                                                                                    | <ul style="list-style-type: none"> <li>Mean citrulline value</li> <li>Controls vs Crohn's disease: <math>33.0 \pm 7.5</math> vs <math>23.5 \pm 8.4</math> <math>\mu\text{mol/L}</math> (<math>p &lt; 0.0001</math>)</li> <li>Crohn's disease patients with small bowel disease vs ileo-colonic disease: <math>14.2 \pm 5.5</math> vs <math>24.7 \pm 8.0</math> <math>\mu\text{mol/L}</math>, <math>p = 0.0037</math></li> <li>Citrulline <math>\leq 22</math> <math>\mu\text{mol/L}</math> had sensitivity of 100% and specificity of 98% for differentiating control subjects from Crohn's disease patients with small bowel disease</li> </ul>                                                                                                                                                                                                                                                                                                                                                                                                                                                                                           |
| 9  | Bernini et al. (2011)                          | <ul style="list-style-type: none"> <li>Sample: 61 overt coeliac disease patients, 29 patients with potential coeliac disease, and 51 control subjects were examined by proton nuclear magnetic resonance of their serum and urine</li> </ul>                                                                                                                                                                                                                                                                                                              | <ul style="list-style-type: none"> <li>Potential coeliac disease largely shares the metabonomic signature of overt coeliac disease. Most metabolites found to be significantly different between control and coeliac disease subjects were also altered in potential coeliac disease</li> </ul>                                                                                                                                                                                                                                                                                                                                                                                                                                                                                                                                                                                                                                                                                                                                                                                                                                            |
| 10 | Blasco Alonso et al. (2011)                    | <ul style="list-style-type: none"> <li>Sample and design: Observational case-control study longitudinal in children 16 months to 14 years: 48 with untreated coeliac disease, 9 coeliac children under gluten free diet and 35 non-coeliac healthy children.</li> <li>Plasma amino acids concentration was measured along with other clinical and analytical data</li> </ul>                                                                                                                                                                              | <ul style="list-style-type: none"> <li>Cases vs Controls: citrulline, arginine and glutamine <math>17.7</math> <math>\mu\text{mol/L}</math>, <math>38.7</math> <math>\mu\text{mol/L}</math>, <math>479.6</math> <math>\mu\text{mol/L}</math> respectively vs <math>28.9</math> <math>\mu\text{mol/L}</math>, <math>56.2</math> <math>\mu\text{mol/L}</math>, <math>563.7</math> <math>\mu\text{mol/L}</math></li> <li>Citrulline levels are significantly lower in the severe degrees of atrophy vs mild ones (<math>13.8</math> <math>\mu\text{mol/L}</math> vs <math>19.7</math> <math>\mu\text{mol/L}</math>, <math>p &lt; 0.05</math>)</li> </ul>                                                                                                                                                                                                                                                                                                                                                                                                                                                                                      |
| 11 | Ioannou et al. (2011)                          | <ul style="list-style-type: none"> <li>Sample: Fasting-plasma citrulline levels were determined by high-performance liquid chromatography in 23 patients with coeliac disease before gluten-free diet (ii) 20 patients with coeliac disease under treatment for more than 2 years responsive to gluten-free diet, (iii) 10 children with gastrointestinal symptoms and normal small bowel biopsy, and (iv) 20 healthy controls.</li> <li>In group (i), citrulline levels were also measured after 1, 3, 6, and 12 months on a gluten-free diet</li> </ul> | <ul style="list-style-type: none"> <li>Mean plasma citrulline levels: <ul style="list-style-type: none"> <li>Lower in untreated patients with coeliac disease <math>24.5 \pm 4.9</math> <math>\mu\text{mol/L}</math> vs <ul style="list-style-type: none"> <li>patients on a gluten-free diet: <math>31.2 \pm 6.7</math> <math>\mu\text{mol/L}</math>, <math>p &lt; 0.001</math></li> <li>patients with gastrointestinal symptoms and normal intestinal mucosa <math>30.3 \pm 4.7</math> <math>\mu\text{mol/L}</math>, <math>p &lt; 0.01</math></li> <li>and healthy controls: <math>32.4 \pm 7.5</math> <math>\mu\text{mol/L}</math>, <math>p &lt; 0.00</math></li> </ul> </li> </ul> </li> <li>In untreated patients with coeliac disease, there was an inverse correlation between citrulline concentrations and severity of villous atrophy (<math>r = -0.67</math>, <math>p &lt; 0.01</math>)</li> <li>After 1 month on a gluten-free diet, patients had significantly higher levels than before diet (<math>p &lt; 0.05</math>) and after 3 months on diet, levels were similar to those observed in the healthy controls</li> </ul> |
| 12 | Elkhatib and Buchman (2012)                    | <ul style="list-style-type: none"> <li>Sample: 81 outpatients aged 18 to 65 years (mean, <math>40.6 \pm 15.4</math> years) with a known history of Crohn's disease</li> <li>Crohn's disease activity was measured by Harvey-Bradshaw Index and was correlated to the plasma citrulline concentration measured simultaneously (ion chromatography)</li> <li>Spearman correlation coefficients were used to assess for an association between the 2 variables</li> </ul>                                                                                    | <ul style="list-style-type: none"> <li>The mean plasma citrulline concentration was normal</li> <li>It failed to distinguish between active and inactive patients based on the Harvey-Bradshaw Index (<math>27.8</math> <math>\mu\text{mol/L}</math>, <math>p = 0.991</math>).</li> <li>There was no significant linear association between the ranks of citrulline and ranks of Harvey-Bradshaw Index (<math>r = 0.012</math>, <math>p = 0.915</math>)</li> <li>No association between plasma citrulline concentration and Harvey-Bradshaw Index (<math>p = 0.583</math>)</li> <li>No difference in plasma citrulline concentrations among those with confirmed inflammation by imaging or endoscopy (<math>p = 0.583</math>)</li> </ul>                                                                                                                                                                                                                                                                                                                                                                                                  |
| 13 | Lee et al. (2013)                              | <ul style="list-style-type: none"> <li>Sample: 63 Crohn's Disease, 23 ulcerative colitis</li> <li>Disease severity was assessed by paediatric Crohn's disease activity index, paediatric ulcerative colitis activity index, simplified endoscopic activity score for Crohn's disease, C-reactive protein, and erythrocyte sedimentation rate</li> <li>Subgroup analysis whether correlations between plasma citrulline levels and disease activity depend on small bowel involvement in patients with Crohn's Disease.</li> </ul>                         | <ul style="list-style-type: none"> <li>Plasma citrulline levels correlated negatively with C-reactive protein (<math>r = -0.332</math>, <math>p = 0.008</math>), erythrocyte sedimentation rate (<math>r = -0.290</math>, <math>p = 0.022</math>), and paediatric Crohn's disease activity index (<math>r = -0.424</math>, <math>p = 0.001</math>) in patients with Crohn's disease.</li> <li>Plasma citrulline levels were lower in patients with jejunal involvement vs those without (<math>p = 0.027</math>)</li> <li>In subgroup analysis, patients with Crohn's disease with jejunal involvement showed significantly negative correlations of plasma citrulline levels with CRP (<math>r = -0.628</math>, <math>p = 0.016</math>) and paediatric Crohn's disease activity index (<math>r = -0.632</math>, <math>p = 0.015</math>); no correlation was noted in patients without jejunal involvement and the simplified endoscopic activity score for Crohn's disease</li> <li>No significant correlations of plasma citrulline levels with inflammatory parameters in ulcerative colitis</li> </ul>                                 |
| 14 | Basso et al. (2014)                            | <ul style="list-style-type: none"> <li>Design and Sample: Cross-sectional study of children and adolescent patients with coeliac disease (<math>n = 48</math>) and controls (<math>n = 42</math>)</li> <li>Citrulline was measured with high performance liquid chromatography and correlated with disease severity</li> </ul>                                                                                                                                                                                                                            | <ul style="list-style-type: none"> <li>Citrulline was significantly lower in coeliac disease patients compared to control subjects</li> <li>Citrulline levels were negatively correlated with disease severity</li> <li>A citrulline cut-off level of <math>27</math> <math>\mu\text{mol/L}</math> produced a sensitivity of 43% and specificity 90%</li> </ul>                                                                                                                                                                                                                                                                                                                                                                                                                                                                                                                                                                                                                                                                                                                                                                            |

---

| <b>No</b> | <b>Authors</b>       | <b>Settings (sample and design)</b>                                                                                                                                                                                   | <b>Main Results</b>                                                                                                                                                                                                                                                                                                                                                                                                                                                                                                                                                                                                                                                                                      |
|-----------|----------------------|-----------------------------------------------------------------------------------------------------------------------------------------------------------------------------------------------------------------------|----------------------------------------------------------------------------------------------------------------------------------------------------------------------------------------------------------------------------------------------------------------------------------------------------------------------------------------------------------------------------------------------------------------------------------------------------------------------------------------------------------------------------------------------------------------------------------------------------------------------------------------------------------------------------------------------------------|
| 15        | Sevinc et al. (2015) | <ul style="list-style-type: none"><li>• Sample: 62 children with classic coeliac disease, 62 age and sex matched healthy control</li><li>• Plasma amino acid levels measured with tandem mass spectrometry.</li></ul> | <ul style="list-style-type: none"><li>• Coeliac children had significant lower plasma levels of citrulline, glutamine and cystine than controls (<math>p &lt; 0.05</math>)</li><li>• Alanine, asparagine, glutamic acid, hydroxyproline, isoleucine, leucine, phenylalanine, proline, serine, threonine and valine were significantly higher in coeliac children than in controls (<math>p &lt; 0.05</math>)</li><li>• No significant difference in levels of arginine, argininosuccinate, aspartic acid, glycine, homocysteine, hydroxylysine, lysine, methionine, ornithine, tryptophan, tyrosine, histidine levels between coeliac children and healthy controls (<math>p &gt; 0.05</math>)</li></ul> |

---

**Supplementary Table 5.** Gastrointestinal toxicity from chemo-radiation therapies studies.

| No | Authors                                         | Settings (sample and design)                                                                                                                                                                                                                                                                                                                                                                                                                                                             | Main Results                                                                                                                                                                                                                                                                                                                                                                                                                                                                                                                                                                                                                                                                                                                                                                                                        |
|----|-------------------------------------------------|------------------------------------------------------------------------------------------------------------------------------------------------------------------------------------------------------------------------------------------------------------------------------------------------------------------------------------------------------------------------------------------------------------------------------------------------------------------------------------------|---------------------------------------------------------------------------------------------------------------------------------------------------------------------------------------------------------------------------------------------------------------------------------------------------------------------------------------------------------------------------------------------------------------------------------------------------------------------------------------------------------------------------------------------------------------------------------------------------------------------------------------------------------------------------------------------------------------------------------------------------------------------------------------------------------------------|
| 1  | Lutgens et al. (2002); Blijlevens et al. (2004) | <ul style="list-style-type: none"> <li>Sample: 32 haematopoietic stem cell transplant recipients following intensive myeloablative therapy during the first 3 weeks after transplantation when patients have oral mucositis</li> </ul>                                                                                                                                                                                                                                                   | <ul style="list-style-type: none"> <li>Significant decline in serum concentrations of citrulline following intensive myeloablative therapy during the first 3 weeks after transplantation when patients have oral mucositis and a markedly disturbed gut integrity</li> <li>Closer inspection of citrulline concentrations of 12 patients confirmed that decline corresponded to the onset of oral mucositis and altered gut integrity</li> </ul>                                                                                                                                                                                                                                                                                                                                                                   |
| 2  | Lutgens et al. (2004)                           | <ul style="list-style-type: none"> <li>Sample: 23 patients were studied weekly during treatment and at intervals of 2 weeks and 3 and 6 months after treatment by post-absorptive plasma citrulline concentration and clinical toxicity grading.</li> <li>The interrelationship between these variables and the correlation with small-bowel dose and volume parameters were investigated.</li> </ul>                                                                                    | <ul style="list-style-type: none"> <li>During fractionated radiotherapy, citrulline concentration significantly decreased as a function of the radiation dose (<math>p &lt; 0.001</math>) and the volume of small bowel treated (<math>p = 0.001</math>)</li> <li>Plasma citrulline concentration correlated with clinical toxicity during the last 3 weeks of treatment. As a whole, citrulline concentration correlated better with radiation dose and volume parameters than clinical toxicity grading.</li> </ul>                                                                                                                                                                                                                                                                                               |
| 3  | Blijlevens et al. (2005a)                       | <ul style="list-style-type: none"> <li>Sample: 32 haematopoietic stem cell transplant recipients following intensive myeloablative therapy.</li> </ul>                                                                                                                                                                                                                                                                                                                                   | <ul style="list-style-type: none"> <li>Significant increase of interleukin-8, lipopolysaccharide-binding protein and C-reactive protein indicating mucosal barrier injury as measured by gut integrity, daily mucositis score and serum citrulline concentrations</li> </ul>                                                                                                                                                                                                                                                                                                                                                                                                                                                                                                                                        |
| 4  | Blijlevens et al. (2005b)                       | <ul style="list-style-type: none"> <li>Design: Prospective, randomised, double-blinded, placebo-controlled pilot study of parenteral nutrition supplemented with 0.57 g/kg glutamine-dipeptide in a homogeneous group of 32 allogeneic stem cell transplant recipients to determine its effect on mucosal barrier injury</li> <li>Mucosal barrier injury measured by sugar permeability tests, daily mucositis score, daily gut score, and citrulline concentrations</li> </ul>          | <ul style="list-style-type: none"> <li>The daily gut score was significantly lower for the glutamine group on day 7 post-transplant (<math>p = 0.001</math>) whilst citrulline was lower (<math>p = 0.03</math>) for the placebo group on day 21 post-transplant</li> <li>Albumin was significantly lower in the placebo group on day 21 post-transplant (<math>32 \pm 4</math> vs <math>37 \pm 3</math>, <math>p = 0.001</math>) whilst C-reactive protein was higher (<math>74 \pm 48</math> vs <math>34 \pm 38</math>, <math>p = 0.003</math>)</li> </ul>                                                                                                                                                                                                                                                        |
| 5  | Lutgens et al. (2005)                           | <ul style="list-style-type: none"> <li>Design: Prospective study, 10 patients with haematological malignancies who were receiving myeloablative therapy had gut toxicity assessed with sugar permeability tests.</li> <li>Serum citrulline concentrations also were determined using archival serum samples</li> </ul>                                                                                                                                                                   | <ul style="list-style-type: none"> <li>Sensitivity and specificity were better for the citrulline assay compared with sugar permeability tests</li> <li>Maximum gut damage assessed with the citrulline assay was observed 1-2 weeks earlier compared with the sugar permeability test</li> <li>Citrulline indicated recovery of gut damage at 3 weeks after transplantation, whereas most sugar permeability tests remained abnormal</li> </ul>                                                                                                                                                                                                                                                                                                                                                                    |
| 6  | Herbers et al. (2008)                           | <ul style="list-style-type: none"> <li>29 patients with high-dose melphalan 200 mg/m<sup>2</sup> to prepare for an autologous Peripheral blood stem cell transplantation</li> <li>Plasma samples from each patient starting before the myeloablative regimen and three times per week thereafter until discharge</li> </ul>                                                                                                                                                              | <ul style="list-style-type: none"> <li>Baseline citrulline concentration was <math>27.6 \pm 4.0</math> <math>\mu\text{mol/L}</math>, and citrulline concentrations declined rapidly thereafter reaching a nadir averaging <math>6.7 \pm 2.7</math> <math>\mu\text{mol/L}</math>, 12 days after starting melphalan.</li> <li>Citrulline concentrations, only increased gradually and were still low (<math>12 \pm 4</math> <math>\mu\text{mol/L}</math>) at discharge.</li> <li>Their mean citrulline concentrations were lower at <math>5.5 \pm 1.5</math> <math>\mu\text{mol/L}</math> than were those of patients without bacteraemia (<math>10.2 \pm 3.9</math> <math>\mu\text{mol/L}</math>)</li> </ul>                                                                                                         |
| 7  | Wedlake et al. (2008)                           | <ul style="list-style-type: none"> <li>Sample: 59 patients (30 males) with mixed pelvic malignancies, receiving 45-70 Gy were recruited</li> <li>At baseline and weeks 4 or 5 of radiotherapy, blood samples for citrulline, C-reactive protein, eosinophil cationic protein and stool samples for faecal calprotectin were obtained</li> </ul>                                                                                                                                          | <ul style="list-style-type: none"> <li>Citrulline (<math>p = 0.02</math>) and faecal calprotectin (<math>p = 0.01</math>) values changed significantly between baseline and 4 or 5 weeks.</li> <li>Inflammatory Bowel Disease Questionnaire - Bowel Subset fell significantly (mean fall = 10 points). Changes in markers did not correlate with symptoms.</li> </ul>                                                                                                                                                                                                                                                                                                                                                                                                                                               |
| 8  | Derikx et al. (2009)                            | <ul style="list-style-type: none"> <li>Sample: 34 adult patients with haematological malignancy received allogeneic haematopoietic stem cell transplant 12 days after myeloablative conditioning with a regimen known to induce oral and intestinal mucosal barrier injury</li> <li>Serum levels of citrulline, intestinal fatty acid binding protein and ileal bile acid-binding protein were measured on transplant days -12, -6, 0, +7, +14 and +21.</li> </ul>                       | <ul style="list-style-type: none"> <li>Myeloablative conditioning resulted in a significant decrease in serum citrulline with the nadir on day 7 post-transplant; thereafter, levels rose gradually.</li> <li>A significant decrease in intestinal fatty acid binding protein and ileal bile acid-binding protein levels occurred from the day of transplant until day +14.</li> </ul>                                                                                                                                                                                                                                                                                                                                                                                                                              |
| 9  | van Vliet et al. (2009)                         | <ul style="list-style-type: none"> <li>Sample: Children with acute myeloid leukaemia</li> <li>Investigations: various mucosal barrier injury-related clinical and laboratory tests, reflecting clinical severity (NCI symptomatic adverse events criteria), daily gut score, inflammation (plasma and faecal interleukin-8, faecal calprotectin), enterocytic loss (plasma citrulline, ratio faecal human DNA/total DNA) and intestinal permeability (sugar absorption tests)</li> </ul> | <ul style="list-style-type: none"> <li>Intestinal mucosal barrier injury as detected by the NCI adverse events criteria was found in 55% of chemotherapy cycles, correlating well with the continuous daily gut score (<math>n = 55</math>, <math>r = 0.581</math>; <math>p &lt; 0.001</math>)</li> <li>Intestinal cell loss as measured by the ratio faecal human DNA/total DNA and plasma citrulline correlated well with both NCI criteria (<math>r = 0.357</math>, <math>p = 0.005</math>; <math>r = -0.482</math>, <math>p &lt; 0.001</math>) and daily gut score (<math>r = 0.352</math>, <math>p = 0.009</math>; <math>r = -0.625</math>, <math>p &lt; 0.001</math>)</li> <li>Plasma interleukin-8 correlated strongly to plasma citrulline (<math>r = -0.627</math>; <math>p &lt; 0.001</math>).</li> </ul> |

| No | Authors                              | Settings (sample and design)                                                                                                                                                                                                                                                                                                                                                                                                                                                                                                                                                     | Main Results                                                                                                                                                                                                                                                                                                                                                                                                                                                                                                                                                                                                                                                                                                                                                                                                                                                                                                                                                                                                                                                                                                                                                                                            |
|----|--------------------------------------|----------------------------------------------------------------------------------------------------------------------------------------------------------------------------------------------------------------------------------------------------------------------------------------------------------------------------------------------------------------------------------------------------------------------------------------------------------------------------------------------------------------------------------------------------------------------------------|---------------------------------------------------------------------------------------------------------------------------------------------------------------------------------------------------------------------------------------------------------------------------------------------------------------------------------------------------------------------------------------------------------------------------------------------------------------------------------------------------------------------------------------------------------------------------------------------------------------------------------------------------------------------------------------------------------------------------------------------------------------------------------------------------------------------------------------------------------------------------------------------------------------------------------------------------------------------------------------------------------------------------------------------------------------------------------------------------------------------------------------------------------------------------------------------------------|
| 10 | Herbers et al. (2010)                | <ul style="list-style-type: none"> <li>Sample and design: Citrulline concentrations were determined at baseline and at least once weekly after the start of myeloablative chemotherapy until 30 days thereafter among 94 allogeneic or autologous haematopoietic stem-cell transplant recipients.</li> <li>Intestinal mucosal damage was described either by level of citrulline on each day, on the basis of different thresholds of citrulline indicating the severity of villous atrophy, or by area under the curve using reciprocal value of 10/citrulline.</li> </ul>      | <ul style="list-style-type: none"> <li>Regimens that incorporated idarubicin induced the most severe intestinal toxicity.</li> <li>Scores based on the level of citrulline, using severity thresholds, and on the area under the reciprocal curve are able to discriminate between the damage induced by different high-dose chemotherapy regimens.</li> </ul>                                                                                                                                                                                                                                                                                                                                                                                                                                                                                                                                                                                                                                                                                                                                                                                                                                          |
| 11 | Jakobsson et al. (2010)              | <ul style="list-style-type: none"> <li>Sample: 29 women undergoing pelvic radiotherapy for anal or uterine cancer were prospectively followed</li> <li>Fatigue and diarrhoea were assessed using patient self-reported questionnaires</li> <li>Plasma citrulline concentration, as a sign of intestinal injury, and C-reactive protein, orosomucoid, albumin, alpha-1-antitrypsin, and haptoglobin, as signs of systemic inflammation, were analysed.</li> </ul>                                                                                                                 | <ul style="list-style-type: none"> <li>Fatigue increased significantly (<math>p &lt; 0.001</math>) and citrulline decreased significantly (<math>p &lt; .001</math>) during treatment.</li> <li>A significant negative correlation (<math>r = -0.40</math>; <math>p &lt; 0.05</math>) was found between fatigue and epithelial atrophy in the intestine (as assessed by plasma citrulline) after 3 weeks of treatment and a significant positive correlation (<math>r = 0.75</math>; <math>p &lt; 0.001</math>) was found between fatigue and diarrhoea.</li> </ul>                                                                                                                                                                                                                                                                                                                                                                                                                                                                                                                                                                                                                                     |
| 12 | van der Velden et al. (2010); (2013) | <ul style="list-style-type: none"> <li>Sample: Retrospective analysis in 163 stem-cell transplant recipients of which data had been collected prospectively on intestinal damage (citrulline), inflammation (C-reactive protein), and neutrophil count.</li> <li>Six different conditioning regimens were studied; 5 myeloablative and 1 non-myeloablative</li> <li>Linear mixed model multivariate and AUC analyses were used to define the role of intestinal damage in post-SCT inflammation.</li> </ul>                                                                      | <ul style="list-style-type: none"> <li>In the 5 myeloablative regimen there was a striking pattern of inflammatory response that coincided with the occurrence of severe intestinal damage</li> <li>This contrasted with a modest inflammatory response seen in the non-myeloablative regimen in which intestinal damage was limited.</li> <li>With linear mixed model analysis the degree of intestinal damage was shown the most important determinant of the inflammatory response, and both neutropenia and bacteraemia had only a minor impact.</li> <li>AUC analysis revealed a strong correlation between citrulline and C-reactive protein (<math>r = 0.96</math>). Intestinal damage was associated with the occurrence of bacteraemia and acute lung injury, and influenced the kinetics of acute graft-versus-host disease</li> </ul>                                                                                                                                                                                                                                                                                                                                                        |
| 13 | Onal et al. (2011)                   | <ul style="list-style-type: none"> <li>Sample: 53 patients (36 prostate cancer, 17 endometrial cancer) who received 45 Gy pelvic radiotherapy using conventional fractionation</li> <li>Patients with prostate cancer received an additional 25-30.6 Gy conformal boost.</li> <li>Plasma citrulline levels were assessed on day 0, mid- (week 3) and post-radiotherapy (week 8), and four months post-radiotherapy.</li> <li>Dose-volume histogram, citrulline concentration changes, and weekly intestinal toxicity scores were analysed.</li> </ul>                            | <ul style="list-style-type: none"> <li>Citrulline concentrations were significantly reduced at week 3 (<math>27.4 \pm 5.9 \mu\text{mol/L}</math>; <math>p &lt; 0.0001</math>), treatment end (<math>29.9 \pm 8.8 \mu\text{mol/L}</math>; <math>p &lt; 0.0001</math>), and four months post-treatment (<math>34.3 \pm 12.1</math>; <math>p = 0.01</math>).</li> <li>The following factor pairs were significantly positively correlated: Citrulline concentration/mean bowel dose during, end of treatment, and four months post-radiotherapy; dose-volume parameters/citrulline change groups; cumulative mean radiation dose/intestinal toxicity at end and four months post-radiotherapy; citrulline changes/intestinal toxicity during and end of radiotherapy.</li> <li>Citrulline concentration changes significantly differed during treatment according to radiotherapy oncology group intestinal toxicity grades (<math>p &lt; 0.0001</math>)</li> </ul>                                                                                                                                                                                                                                        |
| 14 | Vokurka et al. (2013)                | <ul style="list-style-type: none"> <li>Sample: prospective study in 11 adults (18 blood samples) with diarrhoea developed after allogeneic stem-cell transplant in between 2011-2012 compared to 20 healthy control samples</li> </ul>                                                                                                                                                                                                                                                                                                                                           | <ul style="list-style-type: none"> <li>Transplanted patients vs healthy controls: median (IQR) <math>9.3</math> (<math>3.62-15.38</math>) vs. <math>33.3</math> (<math>26.82-36.23</math>) <math>\mu\text{mol/L}</math>, <math>p &lt; 0.0001</math></li> <li>Post-transplant toxic intestinal mucositis (<math>n=8</math>, days 1-22 post-transplant) vs. intestinal graft versus host disease (<math>n=7</math>, day 43-142) vs. other aetiology of diarrhoea (<math>n=3</math>, day 120-127): <math>9.55</math> (<math>2.95-12.03</math>) vs. <math>5</math> (<math>3.85-9.05</math>) vs. <math>15.6</math> (<math>15.45-18.3</math>) <math>\mu\text{mol/L}</math> (<math>p &lt; 0.05</math>)</li> </ul>                                                                                                                                                                                                                                                                                                                                                                                                                                                                                              |
| 15 | Gosselin et al. (2014)               | <ul style="list-style-type: none"> <li>Sample: Multicentre, prospective cohort study of 26 children to define time-related changes in serum citrulline during the course of hematopoietic cell transplantation. Markers of gastrointestinal function including oral energy intake, emesis, stool volume, presence of graft-versus-host disease, oral mucositis severity, and cytokine and neurohormone levels were measured.</li> <li>Weekly serum citrulline concentrations were obtained from 10 days prior until 30 days after hematopoietic cell transplantation.</li> </ul> | <ul style="list-style-type: none"> <li>Mean baseline citrulline concentration was <math>22.7 \mu\text{mol/L}</math> (95% CI <math>17.7-27.6</math>) on day -10, which decreased to a nadir of <math>7.5 \mu\text{mol/L}</math> (95% CI <math>3.1-18.0</math>, <math>p = 0.017</math>) on day 8 following hematopoietic cell transplantation before returning to baseline by day 30.</li> <li>After adjustment for interleukin-6 level (1.0% lower citrulline per 10% increase in interleukin-6, <math>p = 0.004</math>), presence of acute graft-versus-host disease (27% lower citrulline, <math>p = 0.025</math>), and oral energy intake (2.1% lower citrulline per 10% decrease in energy intake, <math>p = 0.018</math>), the nadir shifted to day 10, when mean citrulline concentration was lower in patients with severe oral mucositis (<math>6.7 \mu\text{mol/L}</math>, 95% CI <math>3.4-13.1</math>) than in those without severe mucositis (<math>11.9 \mu\text{mol/L}</math>, 95% CI <math>5.8-24.4</math>, <math>p = 0.003</math>).</li> <li>Change in citrulline was not correlated with stool volume, C-reactive protein, tumour necrosis factor-alpha, leptin, or ghrelin.</li> </ul> |
| 16 | Karlik et al. (2014)                 | <ul style="list-style-type: none"> <li>Aim: To determine whether citrulline levels correlate with clinical markers of intestinal injury in children undergoing a myeloablative allogeneic transplant regimen</li> </ul>                                                                                                                                                                                                                                                                                                                                                          | <ul style="list-style-type: none"> <li>For every 1 <math>\mu\text{mol/L}</math> increase in citrulline, the odds of developing mucositis were 0.88 (95% CI <math>0.79-0.99</math>, <math>p = 0.036</math>)</li> <li>The odds of developing diarrhoea were 0.70 times less for every 1 <math>\mu\text{mol/L}</math> increase in citrulline (95% CI <math>0.59-0.84</math>, <math>p &lt; 0.0001</math>)</li> </ul>                                                                                                                                                                                                                                                                                                                                                                                                                                                                                                                                                                                                                                                                                                                                                                                        |



| No | Authors                | Settings (sample and design)                                                                                                                                                                                                                                                                                                                                                                                                                                    | Main Results                                                                                                                                                                                                                                                                                                                                                                                                                                                                                                                                                                                                                                                                                 |
|----|------------------------|-----------------------------------------------------------------------------------------------------------------------------------------------------------------------------------------------------------------------------------------------------------------------------------------------------------------------------------------------------------------------------------------------------------------------------------------------------------------|----------------------------------------------------------------------------------------------------------------------------------------------------------------------------------------------------------------------------------------------------------------------------------------------------------------------------------------------------------------------------------------------------------------------------------------------------------------------------------------------------------------------------------------------------------------------------------------------------------------------------------------------------------------------------------------------|
| 17 | Brady et al. (2015)    | <ul style="list-style-type: none"> <li>• Sample: 15 patients treated with external beam radiation therapy to either prostate only (n=6) or prostate and pelvis (n=9).</li> <li>• Plasma citrulline levels were measured prior to radiotherapy and weekly during treatment and at 6 weeks, 3 months and 6 months post external beam radiation therapy</li> <li>• Bowel toxicity was assessed at the same time points using EPIC bowel summary scores.</li> </ul> | <ul style="list-style-type: none"> <li>• The strongest correlation between the fall in plasma citrulline levels from baseline and greatest bowel toxicity was observed after 3 weeks of radiotherapy (p=0.03).</li> <li>• A strong predictive trend was noted with positive correlations at 6 weeks post radiotherapy (r = 0.594, p = 0.025), 3 months post radiotherapy (r = 0.534, p = 0.060), 6 months post radiotherapy (r = 0.606, p = 0.037), 9 months post radiotherapy (r = 0.618, p = 0.019) and 1 year post radiotherapy (r = -0.358, p = 0.345).</li> <li>• No significant correlation was found between changes in plasma citrulline levels or EPIC reported toxicity</li> </ul> |
| 18 | Kong et al. (2015)     | <ul style="list-style-type: none"> <li>• Sample: 42 patients with gastric or colorectal cancer underwent chemotherapy</li> <li>• Patients were asked to grade and record their symptoms of gastrointestinal toxicity daily</li> <li>• The urinary lactulose-mannitol ratio was measured to assess the intestinal permeability.</li> <li>• Plasma levels of citrulline, diamine oxidase, D-lactic acid, and endotoxin were also measured</li> </ul>              | <ul style="list-style-type: none"> <li>• The urinary lactulose-mannitol ratio and plasma citrulline levels increased on the third and sixth post-chemotherapy days, respectively</li> <li>• There were no significant differences in the plasma levels of D-lactic acid, endotoxin or diamine oxidase activity compared to their levels before chemotherapy</li> </ul>                                                                                                                                                                                                                                                                                                                       |
| 19 | Wang et al. (2015)     | <ul style="list-style-type: none"> <li>• Aim: To investigate the correlations between fatigue, diarrhoea, and alterations in gut microbiota induced by pelvic radiotherapy.</li> <li>•</li> </ul>                                                                                                                                                                                                                                                               | <ul style="list-style-type: none"> <li>• During the 5-week treatment of pelvic radiotherapy in 11 cancer patients, the general fatigue score significantly increased and was more prominent in the patients with diarrhoea.</li> <li>• The fatigue score was closely correlated with the decrease of serum citrulline and the increases of systemic inflammatory proteins, including haptoglobin, orosomucoid, alpha-1-antitrypsin and tumour necrosis factor-alpha.</li> </ul>                                                                                                                                                                                                              |
| 20 | Zezulová et al. (2016) | <ul style="list-style-type: none"> <li>• Design: Plasma citrulline, serum neopterin and urinary neopterin were measured weekly in 49 patients with rectal carcinoma during chemoradiation</li> </ul>                                                                                                                                                                                                                                                            | <ul style="list-style-type: none"> <li>• Citrulline significantly (p &lt; 0.05) decreased while serum and urinary neopterin concentrations increased during therapy.</li> <li>• Irradiated gut volume correlated significantly inversely with citrulline and positively with urinary neopterin.</li> <li>• Statistically significant inverse correlations were also observed between urinary neopterin and plasma citrulline concentrations during the treatment.</li> <li>• Urinary neopterin concentrations were significantly higher and citrulline concentrations were lower in patients who experienced grade <math>\geq 3</math> gastrointestinal toxicity</li> </ul>                  |

**Supplementary Table 6.** Studies regarding citrulline levels in critical illness or other conditions.

| No | Authors                        | Settings (sample and design)                                                                                                                                                                                                                                                                                                                                                                                                                                                                                                                                                                                                                           | Main Results                                                                                                                                                                                                                                                                                                                                                                                                                                                                                                                                                                                                                                                                                                                               |
|----|--------------------------------|--------------------------------------------------------------------------------------------------------------------------------------------------------------------------------------------------------------------------------------------------------------------------------------------------------------------------------------------------------------------------------------------------------------------------------------------------------------------------------------------------------------------------------------------------------------------------------------------------------------------------------------------------------|--------------------------------------------------------------------------------------------------------------------------------------------------------------------------------------------------------------------------------------------------------------------------------------------------------------------------------------------------------------------------------------------------------------------------------------------------------------------------------------------------------------------------------------------------------------------------------------------------------------------------------------------------------------------------------------------------------------------------------------------|
| 1  | Backman et al. (1975)          | <ul style="list-style-type: none"> <li>Design: The amino acid pattern in plasma was studied in a reference group (n=26) and in three groups of massive obese subjects (n=9, 8, and 9 respectively) before and at intervals after jejunum-ileostomy.</li> </ul>                                                                                                                                                                                                                                                                                                                                                                                         | <ul style="list-style-type: none"> <li>The concentrations of lysine, tyrosine, cystine, and glutamic acids were higher, and asparagin, glutamine, serine, and glycine were lower than in the reference group.</li> <li>During the post-operative period the amino acid pattern changed significantly with serine, glycine, and taurine increased and valine, lysine, leucine, tryptophan, tyrosine, cystine, and citrulline decreased.</li> <li>The amino acid pattern in the obese group with the longest post-operative observation time and a stable body weight differed significantly from that in the reference group only with regard to a low valine concentration and high concentration of taurine and glutamic acid.</li> </ul> |
| 2  | Müller et al. (1983)           | <ul style="list-style-type: none"> <li>Sample: 6 patients - infusing 0.3 mg/24 h of exogenous glucagon</li> </ul>                                                                                                                                                                                                                                                                                                                                                                                                                                                                                                                                      | <ul style="list-style-type: none"> <li>In six normal subjects the same infusion reduced significantly (<math>p &lt; 0.05</math>) plasma alanine, asparagine, glutamate, glutamine, glycine, proline, serine, threonine, arginine, ornithine, lysine and tyrosine</li> <li>This particular glucagon sensitivity of duodenopancreatectomized patients suggests that glucagon deficiency is the cause of their hyperaminoacidaemia.</li> </ul>                                                                                                                                                                                                                                                                                                |
| 3  | Jeevanandam et al. (1991)      | <ul style="list-style-type: none"> <li>Sample: 10 obese and 10 non-obese traumatized patients</li> <li>Plasma levels of free amino acids in the early flow phase of injury when subjects were receiving maintenance fluids without calories or nitrogen</li> </ul>                                                                                                                                                                                                                                                                                                                                                                                     | <ul style="list-style-type: none"> <li>Obese controls showed an increase in valine, leucine, isoleucine, and glutamic acid levels, and a decrease in glycine, tryptophan, threonine, histidine, taurine, citrulline, and cystine levels compared with lean controls.</li> <li>Hypoaminoacidemia was equally seen in traumatized obese and non-obese patients, and it was mainly due to a 24% decrease in nonessential amino acids.</li> <li>Essential amino acid levels were the same in all groups.</li> </ul>                                                                                                                                                                                                                            |
| 4  | Sandstrom et al. (2003)        | <ul style="list-style-type: none"> <li>Sample: Serum L-arginine and L-citrulline and urinary nitrite/nitrate concentrations 1 to 3 days after the onset of symptoms in 11 patients with gallstone pancreatitis, 10 patients with alcoholic pancreatitis, and 6 patients with idiopathic pancreatitis. 13 healthy control blood donors, 9 patients fasting before hernia operations, 8 patients with acute cholecystitis, and 9 alcoholic subjects but no pancreatitis.</li> <li>Serum arginine and citrulline concentrations were measured with high performance liquid chromatography, and urinary nitrite/nitrate spectrophotometrically.</li> </ul> | <ul style="list-style-type: none"> <li>Patients with acute pancreatitis had lower serum L-arginine and L-citrulline concentrations than controls</li> </ul>                                                                                                                                                                                                                                                                                                                                                                                                                                                                                                                                                                                |
| 5  | Sandstrom et al. (2008)        | <ul style="list-style-type: none"> <li>Design: Serum amino acid spectrum was measured daily for five days and after recovery six weeks later in 19 patients admitted to the hospital for acute pancreatitis.</li> </ul>                                                                                                                                                                                                                                                                                                                                                                                                                                | <ul style="list-style-type: none"> <li>These patients had abnormal levels of most amino acids including arginine, citrulline, glutamine and glutamate.</li> <li>Phenylalanine and glutamate were increased, while arginine, citrulline, ornithine and glutamine were decreased compared to levels after recovery</li> </ul>                                                                                                                                                                                                                                                                                                                                                                                                                |
| 6  | Thibault et al. (2008); (2009) | <ul style="list-style-type: none"> <li>Sample: 20 morbidly obese patients operated by Roux-en-Y gastric bypass (17 women, <math>47 \pm 12</math> years, BMI, <math>53.3 \pm 11.3</math> kg/m<sup>2</sup>)</li> <li>Body composition determined by single-frequency bioelectrical impedance analysis. Blood testing,</li> <li>Plasma concentrations of 20 amino acids including citrulline were available for only 7 patients.</li> </ul>                                                                                                                                                                                                               | <ul style="list-style-type: none"> <li>Plasma citrulline (<math>53.6 \pm 16.0</math> <math>\mu</math>mol/L) and other amino acids, except cysteine, did not differ from normal values</li> </ul>                                                                                                                                                                                                                                                                                                                                                                                                                                                                                                                                           |
| 7  | Luiking et al. (2009)          | <ul style="list-style-type: none"> <li>Aim: To compare arginine and citrulline metabolism in septic patients and nonseptic control patients in an intensive care unit and in healthy control subjects.</li> <li>Sample: 10 patients with septic shock, 7 critically ill control patients, and 16 healthy elderly subjects</li> </ul>                                                                                                                                                                                                                                                                                                                   | <ul style="list-style-type: none"> <li>Whole-body citrulline production was significantly lower in septic patients (<math>4.5 \pm 2.1</math> <math>\mu</math>mol/kg/h) than in intensive care control patients (<math>10.1 \pm 2.9</math> <math>\mu</math>mol/kg/h, <math>p &lt; 0.01</math>) and in healthy control subjects (<math>13.7 \pm 4.1</math> <math>\mu</math>mol/kg/h, <math>p &lt; 0.001</math>)</li> <li>Citrulline production is severely low in patients with sepsis and is related to diminished de novo arginine and nitric oxide production</li> </ul>                                                                                                                                                                  |
| 8  | Peters et al. (2009)           | <ul style="list-style-type: none"> <li>Aim: To assess citrulline generation test reference values in 14 stable intensive care patients with respiratory failure with normal renal function and able to tolerate enteral nutrition</li> <li>Amino acid analysis was performed using reverse phase high performance liquid chromatography</li> <li>8 females, 6 males, mean age 60.2 years and BMI 27.2 kg/m<sup>2</sup></li> </ul>                                                                                                                                                                                                                      | <ul style="list-style-type: none"> <li>The incremental area under the curve at 90 minutes during the test following enteral glutamine was 5,807,437 mmol/L.min for venous and 6,807,507 mmol/L.min for arterial citrulline sampling</li> <li>Performing the test with intravenously administered glutamine resulted in an area of 7,707,235 mmol/L.min for venous and 9,297,223 mmol/L.min for arterial citrulline sampling</li> <li>Positive correlation between venous and arterial citrulline sampling in enteral (<math>r = 0.96</math>, <math>p &lt; 0.0001</math>) and intravenous glutamine (<math>r = 0.91</math>, <math>p &lt; 0.0001</math>)</li> </ul>                                                                          |

| No | Authors                 | Settings (sample and design)                                                                                                                                                                                                                                                                                                                                                                                                                                                                                                             | Main Results                                                                                                                                                                                                                                                                                                                                                                                                                                                                                                                                                                                                                                                                                                                             |
|----|-------------------------|------------------------------------------------------------------------------------------------------------------------------------------------------------------------------------------------------------------------------------------------------------------------------------------------------------------------------------------------------------------------------------------------------------------------------------------------------------------------------------------------------------------------------------------|------------------------------------------------------------------------------------------------------------------------------------------------------------------------------------------------------------------------------------------------------------------------------------------------------------------------------------------------------------------------------------------------------------------------------------------------------------------------------------------------------------------------------------------------------------------------------------------------------------------------------------------------------------------------------------------------------------------------------------------|
| 9  | Crenn et al. (2010)     | <ul style="list-style-type: none"> <li>Aim: To investigate in septic shock patients with multi-organ failure plasma citrulline pharmacokinetics, associated parameters and pro tumour necrosis factor alpha /anti-interleukin-10-inflammatory plasma cytokines</li> <li>Two groups (n = 16, 7 males, age 63 ± 12 years) were selected: survivors (n = 8), deceased patients (n = 8)</li> </ul>                                                                                                                                           | <ul style="list-style-type: none"> <li>Citrulline decreased during day 0 (29 ± 10 vs 18 ± 6 µmol/L, p &lt; 0.05) in most patients</li> <li>Citrulline remained &lt; 10 µmol/L in 2 patients of the deceased group whereas a transient citrulline &lt; 10 µmol/L was noted in 2 survivors. Citrulline normalised on day 7 in 5 survivors and 1 deceased patient (p = 0.10)</li> <li>Citrulline was negatively correlated with C-Reactive protein (r = 0.31, p &lt; 0.01) but positively with glutamine, arginine and creatinine (r = 0.95, 0.92, 0.25, p &lt; 0.05)</li> <li>No significant correlation was found between citrulline and albumin, tumour necrosis factor alpha, and interleukin-10</li> </ul>                             |
| 10 | Pan et al. (2010)       | <ul style="list-style-type: none"> <li>Sample: 32 patients with acute pancreatitis onset within 7 days</li> <li>Severity of disease and gut dysfunction on admission, on day 7, and day 3 of enteral nutrition</li> <li>Serum levels of intestinal fatty acid binding protein, citrulline, and C-reactive protein (CRP) and the lactulose and mannitol absorption ratio in urine were measured in parallel</li> </ul>                                                                                                                    | <ul style="list-style-type: none"> <li>Intestinal fatty acid binding protein increased on admission and in severe attacks</li> <li>All patients: ↑ gut dysfunction score, C-reactive protein, urine level of lactulose and mannitol absorption ratio; ↓ citrulline</li> <li>Positive correlation noted between intestinal fatty acid binding protein and gut dysfunction score, Acute Physiology and Chronic Health Evaluation II score, C-reactive protein and intensive care stay</li> <li>Negative correlation noted between intestinal fatty acid binding protein and citrulline</li> </ul>                                                                                                                                          |
| 11 | Piton et al. (2010)     | <ul style="list-style-type: none"> <li>Design: Prospective observational of 67 patient without small bowel disease and without chronic renal failure consecutively admitted to a single intensive care unit</li> <li>Plasma citrulline concentrations were studied at admission, 12, 24, 48 hours, and the 7th day after admission</li> </ul>                                                                                                                                                                                            | <ul style="list-style-type: none"> <li>1<sup>st</sup> day: mean citrulline decreased from 18.8 to 13.5 µmol/L</li> <li>Low plasma citrulline at 24 hours was associated with low plasma glutamine (p = 0.01) and arginine (p = 0.04), high plasma C-reactive protein (p = 0.008), nosocomial infection rate (p = 0.03), and 28-day mortality (p = 0.02)</li> <li>Multivariate analysis: plasma citrulline ≤ 10 µmol/L at 24 hours and Sequential Organ Failure Assessment score ≥ 8 at 24 hours had higher 28-day mortality (odds ratio 8.7, 15.1, respectively)</li> </ul>                                                                                                                                                              |
| 12 | Través et al. (2010)    | <ul style="list-style-type: none"> <li>Sample: 28 patients who underwent subtotal gastrectomy or hemicolectomy and were placed on short-term parenteral nutrition</li> <li>Design: Assigned on a Parenteral-Oral (4-day parenteral nutrition and 4-day oral, n = 8) or a Parenteral-Only (7-day parenteral nutrition, n = 20) nutritional regime</li> </ul>                                                                                                                                                                              | <ul style="list-style-type: none"> <li>Pre-operative citrulline values were within range with those of a western population.</li> <li>On day 4 in the Parenteral-Oral regime, citrulline levels were 60% lower than pre-operative levels</li> <li>When enteral feeding was resumed, citrulline rose and was close to pre-operative values on day 8</li> <li>In the Parenteral-Only regime the parenteral nutrition solution composition had no influence on the citrulline</li> </ul>                                                                                                                                                                                                                                                    |
| 13 | van Noord et al. (2011) | <ul style="list-style-type: none"> <li>Sample: Consecutive patients suspected of chronic gastrointestinal ischaemia (n = 40), healthy subjects (n = 9)</li> <li>Blood samples for analysis of intestinal fatty acid-binding protein, D-dimer, lactate dehydrogenase, leucocyte counts, C-reactive protein, and L-lactate were drawn before and after a standard meal.</li> <li>Intestinal mucosal injury was assessed with glutamine, citrulline and arginine in blood samples and compared to a sugar absorption test</li> </ul>        | <ul style="list-style-type: none"> <li>Ischaemia diagnosed in 32 patients</li> <li>No difference noted in any parameter between patients with and without ischaemia</li> <li>L-lactate was increased in ischaemia patients compared to non-ischaemia patients.</li> <li>In ischaemia patients, D-dimer levels showed a significant elevation post-prandially compared to baseline.</li> </ul>                                                                                                                                                                                                                                                                                                                                            |
| 14 | Verdam et al. (2011)    | <ul style="list-style-type: none"> <li>Aim: To investigate the relation between plasma markers of small intestinal function and chronic hyperglycaemia</li> <li>Sample: Cross-sectional observational study of 40 severely obese subjects with chronic hyperglycaemia and 30 severely obese subjects without chronic hyperglycaemia who were indicated for bariatric surgery.</li> <li>Measurement of plasma levels of citrulline, intestinal fatty acid binding protein, glucagon-like peptide-2, glycated haemoglobin HbA1c</li> </ul> | <ul style="list-style-type: none"> <li>Plasma citrulline and intestinal fatty acid binding protein levels were significantly elevated in chronic hyperglycaemia compared to normal HbA1c (Citrulline: 35 ± 2.1 vs 26 ± 1.4 µmol/L, p = 0.001; intestinal fatty acid binding protein: 140 ± 22 vs 69 ± 14 pg/mL, p = 0.001)</li> <li>Plasma citrulline and intestinal fatty acid binding protein correlated with HbA1c (r = 0.30, 0.33, p &lt; 0.05, respectively).</li> <li>Intestinal fatty acid binding protein to citrulline ratio was higher in subjects with elevated HbA1c (4.0 vs 3.1, p = 0.03)</li> <li>Glucagon-like peptide-2 was not related to citrulline or intestinal fatty acid binding protein (p &gt; 0.05)</li> </ul> |
| 15 | Lundy et al. (2012)     | <ul style="list-style-type: none"> <li>Design: Observations of serial plasma citrulline levels in a severely burned adult who ultimately died from non-occlusive mesenteric ischaemia leading to full-thickness small bowel necrosis</li> </ul>                                                                                                                                                                                                                                                                                          | <ul style="list-style-type: none"> <li>Decrease of citrulline around settings of ischaemia and increase of lactate</li> </ul>                                                                                                                                                                                                                                                                                                                                                                                                                                                                                                                                                                                                            |
| 16 | Noordally et al. (2012) | <ul style="list-style-type: none"> <li>Aim: Prospective observational single-centre controlled study (n = 91, 31 females, mean 69.3 years)</li> <li>Inclusion criteria: intensive care stay over 48 hours</li> <li>Plasma citrulline: low (0-15 µmol/L), medium (16-35 µmol/L), and high (&gt; 36 µmol/L)</li> </ul>                                                                                                                                                                                                                     | <ul style="list-style-type: none"> <li>Mean citrulline: 21.7 ± 13.1 µmol/L</li> <li>Patients with intestinal dysfunction had low plasma citrulline level &lt; 15 µmol/L (p = 0.014)</li> <li>No correlations noted between C-reactive protein, albumin, prealbumin, renal failure, inotrope use, Sequential Organ Failure Assessment score, Acute Physiology and Chronic Health Evaluation II score and citrulline</li> </ul>                                                                                                                                                                                                                                                                                                            |

| No | Authors                        | Settings (sample and design)                                                                                                                                                                                                                                                                                                                                                                                                                                                                                                                                                                                                                                                                                            | Main Results                                                                                                                                                                                                                                                                                                                                                                                                                                                                                                                                                                                                                                                                                                                                                                                                                                                                                                                                                                                                                    |
|----|--------------------------------|-------------------------------------------------------------------------------------------------------------------------------------------------------------------------------------------------------------------------------------------------------------------------------------------------------------------------------------------------------------------------------------------------------------------------------------------------------------------------------------------------------------------------------------------------------------------------------------------------------------------------------------------------------------------------------------------------------------------------|---------------------------------------------------------------------------------------------------------------------------------------------------------------------------------------------------------------------------------------------------------------------------------------------------------------------------------------------------------------------------------------------------------------------------------------------------------------------------------------------------------------------------------------------------------------------------------------------------------------------------------------------------------------------------------------------------------------------------------------------------------------------------------------------------------------------------------------------------------------------------------------------------------------------------------------------------------------------------------------------------------------------------------|
| 17 | Grimaldi et al. (2013)         | <ul style="list-style-type: none"> <li>Sample: 21 patients following resuscitation after cardiac arrest</li> <li>Urinary intestinal fatty acid-binding protein, plasma citrulline, whole blood endotoxin were measured at admission, days 1-3 and 6</li> <li>Kinetics of release and the relationship between intestinal fatty acid-binding protein, citrulline and endotoxin values</li> </ul>                                                                                                                                                                                                                                                                                                                         | <ul style="list-style-type: none"> <li>Lowest median of citrulline was attained at day 2 (11 vs 24 <math>\mu\text{mol/L}</math> at admission, <math>p = 0.01</math>) and normalised at day 6 (21 <math>\mu\text{mol/L}</math>)</li> <li>Highest endotoxin level was negatively correlated lowest plasma citrulline levels (<math>r^2 = 0.55</math>, <math>p &lt; 0.001</math>)</li> </ul>                                                                                                                                                                                                                                                                                                                                                                                                                                                                                                                                                                                                                                       |
| 18 | Kao et al. (2013)              | <ul style="list-style-type: none"> <li>Aim: To investigate how sepsis affects glutamine metabolism, including its conversion to citrulline, by measuring glutamine and citrulline flux, fractional splanchnic extraction of glutamine and leucine, and the contribution of glutamine nitrogen to citrulline in septic patients and healthy controls</li> <li>Sample: 8 patients with severe sepsis and 10 healthy controls were given primed, constant intravenous infusion of [<math>^2\text{H}_2</math>]citrulline and sequential administration of intravenous and enteral [<math>\alpha</math>-<math>^{15}\text{N}</math>]glutamine and [<math>^{13}\text{C}</math>]leucine in the post-absorptive state</li> </ul> | <ul style="list-style-type: none"> <li>Compared with healthy controls, septic patients had a significantly lower whole body citrulline flux and plasma concentration, higher endogenous leucine flux, and higher glutamine clearance</li> <li>The majority of the <math>^{15}\text{N}</math> label transferred from glutamine to citrulline was found at the <math>\alpha</math>-position</li> <li>Lower glutamine plasma concentrations in sepsis were a result of increased glutamine clearance</li> <li>Despite adequate splanchnic uptake of glutamine, there is decreased production of citrulline, suggesting a defect in the metabolic conversion of glutamine to citrulline, decreased uptake of glutamine by the enterocyte but increased uptake by the liver, and/or shunting of glutamine to other metabolic pathways</li> </ul>                                                                                                                                                                                     |
| 19 | Piton et al. (2013)            | <ul style="list-style-type: none"> <li>Design and Sample: 103 intensive care patients, prospective observational study</li> <li>Inclusion criteria: 18 years old or older; expected intensive care stay over 48 hours, without pregnancy, chronic small bowel disease, or chronic renal failure</li> <li>Plasma intestinal fatty acid-binding protein, citrulline concentrations, and variables relating to prognosis and treatment, were measured on admission</li> </ul>                                                                                                                                                                                                                                              | <ul style="list-style-type: none"> <li>Intestinal fatty acid-binding protein elevation on admission was associated with catecholamine support, higher lactate concentration, higher Sequential Organ Failure Assessment score, and higher international normalized ratio (<math>p &lt; 0.001</math>)</li> <li>Plasma citrulline concentration <math>\leq 10 \mu\text{mol/L}</math> on admission was associated with higher intra-abdominal pressure, higher plasma C-reactive protein concentration, and more frequent antibiotic use (<math>p &lt; 0.005</math>)</li> <li>No correlation between plasma levels of intestinal fatty acid-binding protein and citrulline</li> <li>On admission, Sequential Organ Failure Assessment score <math>\geq 12</math>, plasma citrulline <math>\leq 12.2 \mu\text{mol/L}</math>, and plasma intestinal fatty acid-binding protein concentration <math>\geq 355 \text{ pg/mL}</math> were associated with higher 28-day mortality (odds ratio 4.39, 5.17, 4.46, respectively)</li> </ul> |
| 20 | Ware et al. (2013)             | <ul style="list-style-type: none"> <li>Sample: Plasma citrulline, arginine and ornithine levels and nitrate/nitrite were measured at baseline in 135 patients with severe sepsis</li> <li>Acute respiratory distress syndrome was diagnosed by a consensus definition</li> </ul>                                                                                                                                                                                                                                                                                                                                                                                                                                        | <ul style="list-style-type: none"> <li>Plasma citrulline levels:</li> <li>Below normal in all patients: median 9.2 (5.2-14.4) <math>\mu\text{mol/L}</math></li> <li>Acute respiratory distress syndrome vs non-acute respiratory distress syndrome: 6.0 (3.3-10.4) vs 10.1 (6.2-16.6) <math>\mu\text{mol/L}</math>, <math>p = 0.002</math></li> <li>The rate of acute respiratory distress syndrome was 50% in the lowest citrulline quartile compared to 15% in the highest citrulline quartile (<math>p = 0.002</math>)</li> <li>In multivariable analyses, citrulline levels were associated with acute respiratory distress syndrome after adjustment for covariates including illness severity</li> </ul>                                                                                                                                                                                                                                                                                                                  |
| 21 | Alekseeva and Sal'nikov (2014) | <ul style="list-style-type: none"> <li>Sample: 27 critical condition patients (15 females, age <math>70 \pm 14</math> years)</li> <li>On admission to intensive care, plasma glutamine, citrulline, glutamic acid (liquid chromatography), relative duodenal and jejunum electrical activity were measured</li> </ul>                                                                                                                                                                                                                                                                                                                                                                                                   | <ul style="list-style-type: none"> <li>No increase noted in plasma glutamine, citrulline or glutamic acid</li> <li>Worst prognosis was observed when citrulline was <math>\leq 10 \mu\text{mol/L}</math> and signified decrease in proximal small intestine relative electrical activity</li> </ul>                                                                                                                                                                                                                                                                                                                                                                                                                                                                                                                                                                                                                                                                                                                             |
| 22 | Carswell et al. (2014)         | <ul style="list-style-type: none"> <li>Sample: obese controls (BMI <math>&gt; 30 \text{ kg/m}^2</math>, <math>n = 7</math>), adjustable gastric banding (<math>n = 6</math>), Roux-en-Y gastric bypass (<math>n = 7</math>), biliopancreatic diversion with duodenal switch (<math>n = 5</math>).</li> <li>Measurements: oro-caecal transit time, fasting plasma citrulline, 3 days of faecal elastase 1, calprotectin, fatty acids</li> </ul>                                                                                                                                                                                                                                                                          | <ul style="list-style-type: none"> <li>No difference in oro-caecal transit time (<math>p = 0.935</math>) or citrulline levels (<math>p = 0.819</math>)</li> <li>Faecal calprotectin was elevated post-Roux-en-Y gastric bypass vs obese (<math>p = 0.016</math>) and faecal elastase 1 was decreased post-Roux-en-Y gastric bypass vs obese (<math>p = 0.002</math>)</li> </ul>                                                                                                                                                                                                                                                                                                                                                                                                                                                                                                                                                                                                                                                 |
| 23 | Piton et al. (2015a)           | <ul style="list-style-type: none"> <li>Sample: 69 patients with cardiac arrest of both cardiac and hypoxic origin admitted to intensive care</li> <li>Design: Prospective, observational, single-centre study, evaluating plasma citrulline and intestinal fatty acid-binding protein concentrations on admission and after 24 hours</li> <li>Comparison of the variables according to 28-day Cerebral Performance Category score of 1-2 (good neurological outcome) vs 3-5 (poor neurological outcome)</li> </ul>                                                                                                                                                                                                      | <ul style="list-style-type: none"> <li>On admission, citrulline was low in 65 % and plasma intestinal fatty acid-binding protein was high in 82 %</li> <li>At 24 hours, citrulline was low in 82 % and intestinal fatty acid-binding protein was normal in 60 %</li> <li>Patients with a poor neurological outcome had a lower plasma citrulline concentration and a higher intestinal fatty acid-binding protein on admission</li> <li>Multivariate analysis: plasma citrulline levels <math>\leq 13.1 \mu\text{mol/L}</math> and intestinal fatty acid-binding protein <math>&gt; 260 \text{ pg/mL}</math> were independently associated with a poor neurological outcome (odds ratio 21.9, 13.6, respectively)</li> </ul>                                                                                                                                                                                                                                                                                                    |

| No | Authors              | Settings (sample and design)                                                                                                                                                                                                                                                                                                                                                                                                                                                                                                                                                                   | Main Results                                                                                                                                                                                                                                                                                                                                                                                                                                                                                                                                                                                                                                                                           |
|----|----------------------|------------------------------------------------------------------------------------------------------------------------------------------------------------------------------------------------------------------------------------------------------------------------------------------------------------------------------------------------------------------------------------------------------------------------------------------------------------------------------------------------------------------------------------------------------------------------------------------------|----------------------------------------------------------------------------------------------------------------------------------------------------------------------------------------------------------------------------------------------------------------------------------------------------------------------------------------------------------------------------------------------------------------------------------------------------------------------------------------------------------------------------------------------------------------------------------------------------------------------------------------------------------------------------------------|
| 24 | Piton et al. (2015b) | <ul style="list-style-type: none"> <li>• Aim: To examine whether catecholamines in critically ill patients may be associated with enterocyte damage</li> <li>• Design: Prospective observational study.</li> <li>• Sample: Critically ill patients requiring epinephrine and/or norepinephrine on admission to intensive care (n = 60). Controls not receiving catecholamines (n = 27)</li> <li>• Measurement on admission: plasma intestinal fatty acid-binding protein, plasma citrulline, abdominal perfusion pressure, and variables relating to prognosis and treatment</li> </ul>        | <ul style="list-style-type: none"> <li>• Plasma intestinal fatty acid-binding protein was higher among patients receiving catecholamine vs controls</li> <li>• In patients receiving catecholamines, a dose of 0.48 <math>\gamma</math>/kg/min or more on admission was associated with a higher intestinal fatty acid-binding protein concentration</li> <li>• Sepsis-related Organ Failure Assessment score &gt; 11 and plasma intestinal fatty acid-binding protein more than 524 pg/mL on admission were independently associated with 28-day mortality</li> <li>• Citrulline was not associated with catecholamine dose but was generally low: median 14.7 (8.8-27.9).</li> </ul> |
| 25 | Poole et al. (2015)  | <ul style="list-style-type: none"> <li>• Sample: Prospective observational study, 15 healthy, 20 critically ill subjects</li> <li>• Fasting plasma citrulline concentrations were assayed in blood samples immediately prior to the administration of a liquid test meal (1 kcal/ml; containing 3 g of 3-O-methylglucose) that was infused directly into the small intestine</li> <li>• Serum 3-O-methylglucose concentrations were measured over the following 4 hours, with the area under the 3-O-methylglucose concentration curve calculated as an index of glucose absorption</li> </ul> | <ul style="list-style-type: none"> <li>• Healthy subjects vs critically ill patients: citrulline 26.5 vs 15.2 <math>\mu</math>mol/L, p &lt; 0.01; glucose absorption 79.7 vs 61.0 mmol/L/240 min, p = 0.05</li> <li>• No relationship between fasting citrulline concentration and subsequent glucose absorption was noted (r = 0.28; p = 0.12)</li> </ul>                                                                                                                                                                                                                                                                                                                             |

**Supplementary Table 7.** Meta-regression results of the correlation of citrulline with small bowel length with four potential sources of heterogeneity.

| <b>Variable</b>                      | <b>Coefficient (95% CI)</b> | <b>SE</b> | <b>p-value</b> |
|--------------------------------------|-----------------------------|-----------|----------------|
| <b>Male %</b>                        | -0.0196 (-0.1155, 0.0763)   | 0.03      | <b>0.562</b>   |
| <b>Age</b>                           | 0.0500 (-0.1267, 0.2268)    | 0.06      | <b>0.434</b>   |
| <b>BMI</b>                           | -0.0088 (-0.1593, 0.1416)   | 0.05      | <b>0.864</b>   |
| <b>Mean citrulline concentration</b> | -0.0779 (-0.3997, 0.2439)   | 0.10      | <b>0.497</b>   |
| <b>Mean small bowel length</b>       | -0.0266 (-0.1043, 0.0510)   | 0.02      | <b>0.355</b>   |
| <b>Constant</b>                      | 3.7196 (-5.4980, 12.9372)   | 2.90      | <b>0.289</b>   |

Restricted maximum likelihood estimate of between-study variance:  $\tau^2 = 0.8593$   
% residual variation due to heterogeneity:  $I^2 = 98.9\%$   
Proportion of between-study variance explained: Adjusted  $R^2 = 0\%$   
Joint test for all covariates: Model  $F(5,3) = 0.34$   
With Knapp-Hartung modification:  $p > F = 0.862$

**Supplementary Table 8.** Diagnostic accuracy characteristics from studies investigating short bowel syndrome.

| <b>Study</b>                | <b>TP</b> | <b>FP</b> | <b>FN</b> | <b>TN</b> | <b>Citrulline cut-off level (<math>\mu\text{mol/L}</math>)</b> | <b>AUC (ROC) (95% CI)</b> | <b>Sensitivity</b> | <b>Specificity</b> | <b>Groups under comparison</b> |
|-----------------------------|-----------|-----------|-----------|-----------|----------------------------------------------------------------|---------------------------|--------------------|--------------------|--------------------------------|
| Crenn et al. (2000)         | 34        | 2         | 3         | 18        | 20                                                             |                           | 92 %               | 91 %               | HPN dependency                 |
| Rhoads et al. (2005)        | 13        | 0         | 3         | 5         | 20                                                             | 0.91 (0.79, 1.00)         | 81 %               | 100 %              | HPN dependency                 |
| Peters et al. (2007c)       | 8         | 4         | 22        | 14        |                                                                | 0.50 (0.30, 0.71)         | 25 %               | 77 %               | SBS vs Controls                |
| Papadia et al. (2007)       | 22        | 4         | 5         | 24        | 21                                                             | 0.87                      | 83 %               | 87 %               | HPN dependency                 |
| Parekh et al. (2008)        | 30        | 21        | 0         | 28        | 20                                                             | 0.82 (0.71, 0.93)         | 100 %              | 57 %               | SBS vs Controls                |
| Santarpia et al. (2008)     | 15        | 1         | 0         | 9         | 10                                                             | 0.65 (0.43, 0.88)         | 100 %              | 9 %                | HPN dependency                 |
| Fitzgibbons et al. (2009)   | 16        | 2         | 2         | 7         | 15                                                             | 0.88 (0.75, 1.00)         | 89 %               | 78 %               | HPN dependency                 |
| Bailly-Botuha et al. (2009) | 20        | 9         | 1         | 3         | 20                                                             | 0.46 (0.25, 0.67)         | 95 %               | 25 %               | HPN dependency                 |
| Diamanti et al. (2010)      | 11        | 1         | 1         | 10        | 20                                                             |                           | 91 %               | 89 %               | HPN dependency                 |
| Pironi et al. (2011)        | 25        | 25        | 2         | 20        | 20                                                             |                           | 50 %               | 91 %               | HPN dependency                 |
| Raphael et al. (2011)       | 5         | 1         | 3         | 1         | 20                                                             |                           | 63 %               | 50 %               | HPN dependency                 |
| Diamanti et al. (2011b)     | 9         | 1         | 5         | 13        | 10                                                             | 0.90 (0.70, 1.00)         | 64 %               | 93 %               | HPN dependency                 |
| Pironi et al. (2012)        | 33        | 0         | 34        | 26        | 14                                                             |                           | 49 %               | 100 %              | HPN dependency                 |
| Suzuki et al. (2012)        | 2         | 1         | 0         | 3         | 15                                                             |                           | 100 %              | 75 %               | HPN dependency                 |
| Amiot et al. (2013)         | 38        | 10        | 86        | 134       | 20                                                             | 0.85 (0.78, 0.92)         | 31 %               | 93 %               | HPN dependency                 |
| Pinto Costa et al. (2013)   | 6         | 4         | 5         | 20        | 25.5                                                           | 0.67 (0.46, 0.88)         | 55 %               | 83 %               | SBS vs Controls                |

**Supplementary Table 9.** Results of diagnostic meta-analysis regarding sensitivity and specificity in patients with all conditions and only short bowel syndrome.

|                                          | All conditions (26 studies)                                                                                                                              |             |       |       | Short bowel syndrome (16 studies)                                                                                                                      |             |       |       |
|------------------------------------------|----------------------------------------------------------------------------------------------------------------------------------------------------------|-------------|-------|-------|--------------------------------------------------------------------------------------------------------------------------------------------------------|-------------|-------|-------|
|                                          | Coefficient (95% CI)                                                                                                                                     | SE          | z     | p > z | Coefficient (95% CI)                                                                                                                                   | SE          | z     | p > z |
| <b>Bivariate Model</b>                   |                                                                                                                                                          |             |       |       |                                                                                                                                                        |             |       |       |
| Expected value of logit[Sensitivity]     | 1.37 (0.82, 1.92)                                                                                                                                        | 0.28        |       |       | 1.55 (0.70, 2.40)                                                                                                                                      | 0.43        |       |       |
| Expected value of logit[Specificity]     | 1.63 (1.19, 2.06)                                                                                                                                        | 0.22        |       |       | 1.52 (0.86, 2.17)                                                                                                                                      | 0.33        |       |       |
| Variance of logit[Sensitivity]           | 1.57 (0.77, 3.19)                                                                                                                                        | 0.57        |       |       | 2.22 (0.89, 5.57)                                                                                                                                      | 1.04        |       |       |
| Variance of logit[Specificity]           | 0.82 (0.37, 1.85)                                                                                                                                        | 0.34        |       |       | 1.13 (0.41, 3.12)                                                                                                                                      | 0.58        |       |       |
| Correlation between logits               | -0.55 (-0.84, -0.02)                                                                                                                                     | 0.21        |       |       | -0.64 (-0.92, 0.06)                                                                                                                                    | 0.25        |       |       |
| <b>HSROC</b>                             |                                                                                                                                                          |             |       |       |                                                                                                                                                        |             |       |       |
| $\lambda$                                | 3.08 (2.51, 3.64)                                                                                                                                        | 0.29        |       |       | 3.10 (2.31, 3.90)                                                                                                                                      | 0.41        |       |       |
| $\theta$                                 | -0.37 (-0.89, 0.14)                                                                                                                                      | 0.26        |       |       | -0.24 (-0.96, 0.47)                                                                                                                                    | 0.36        |       |       |
| $\beta$                                  | -0.32 (-0.82, 0.17)                                                                                                                                      | 0.25        | -1.27 | 0.204 | -0.34 (-0.94, 0.27)                                                                                                                                    | 0.31        | -1.10 | 0.272 |
| $\sigma_{\alpha}^2$                      | 1.03 (0.37, 2.82)                                                                                                                                        | 0.53        |       |       | 1.15 (0.26, 5.06)                                                                                                                                      | 0.87        |       |       |
| $\sigma_{\theta}^2$                      | 0.88 (0.45, 1.72)                                                                                                                                        | 0.30        |       |       | 1.30 (0.56, 2.98)                                                                                                                                      | 0.55        |       |       |
| <b>Summary</b>                           |                                                                                                                                                          |             |       |       |                                                                                                                                                        |             |       |       |
| <b>Sensitivity</b>                       | <b>80 % (69%, 87%)</b>                                                                                                                                   | <b>0.05</b> |       |       | <b>82 % (67%, 92%)</b>                                                                                                                                 | <b>0.06</b> |       |       |
| <b>Specificity</b>                       | <b>84 % (77%, 89%)</b>                                                                                                                                   | <b>0.03</b> |       |       | <b>82 % (70%, 90 %)</b>                                                                                                                                | <b>0.05</b> |       |       |
| <b>Diagnostic odds ratio</b>             | <b>20.03 (11.55, 34.72)</b>                                                                                                                              | <b>5.62</b> |       |       | <b>21.43 (9.58, 47.90)</b>                                                                                                                             | <b>8.80</b> |       |       |
| <b>Positive likelihood ratio</b>         | <b>4.85 (3.47, 6.80)</b>                                                                                                                                 | <b>0.84</b> |       |       | <b>4.58 (2.82, 7.44)</b>                                                                                                                               | <b>1.13</b> |       |       |
| <b>Negative likelihood ratio</b>         | <b>0.24 (0.16, 0.37)</b>                                                                                                                                 | <b>0.05</b> |       |       | <b>0.21 (0.11, 0.41)</b>                                                                                                                               | <b>0.07</b> |       |       |
| <b>Inverse negative likelihood ratio</b> | <b>4.13 (2.72, 6.25)</b>                                                                                                                                 | <b>0.87</b> |       |       | <b>4.68 (2.43, 9.01)</b>                                                                                                                               | <b>1.56</b> |       |       |
| <b>Model characteristics</b>             | Covariance between estimates of Expected value of logit[Sensitivity] and Expected value of logit[Specificity]: -137.82452<br>Log likelihood = -0.0247892 |             |       |       | Covariance between estimates of Expected value of logit[Sensitivity] and Expected value of logit[Specificity]: -0.06415<br>Log likelihood = -79.102622 |             |       |       |

## Supplementary Figures

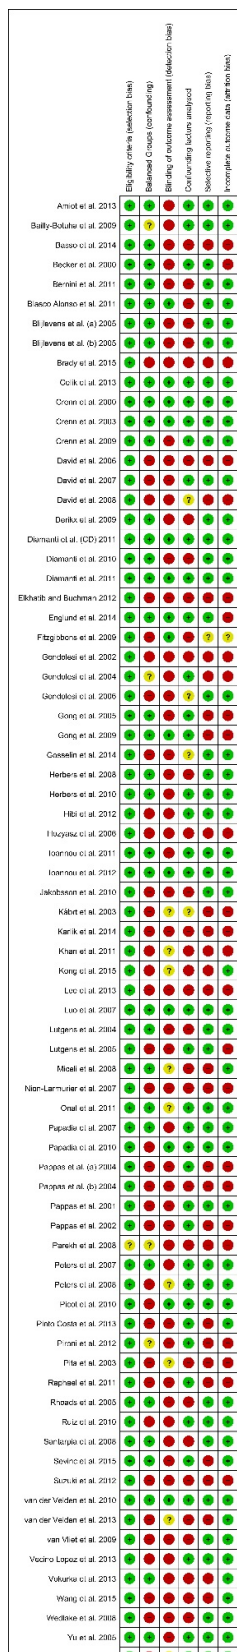

**Supplementary Figure 1.** Risk of bias summary: review authors' judgements about each risk of bias item for each included study.



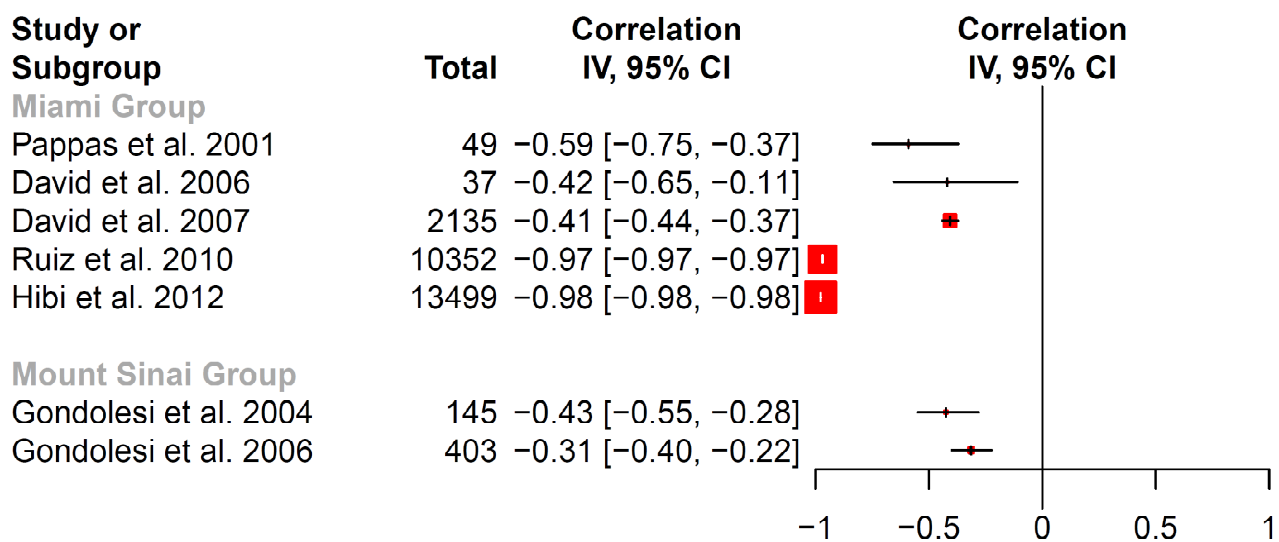

**Supplementary Figure 2.** Forest plot of Intestinal Transplantation (citrulline concentrations with rejection) – without meta-analysis.

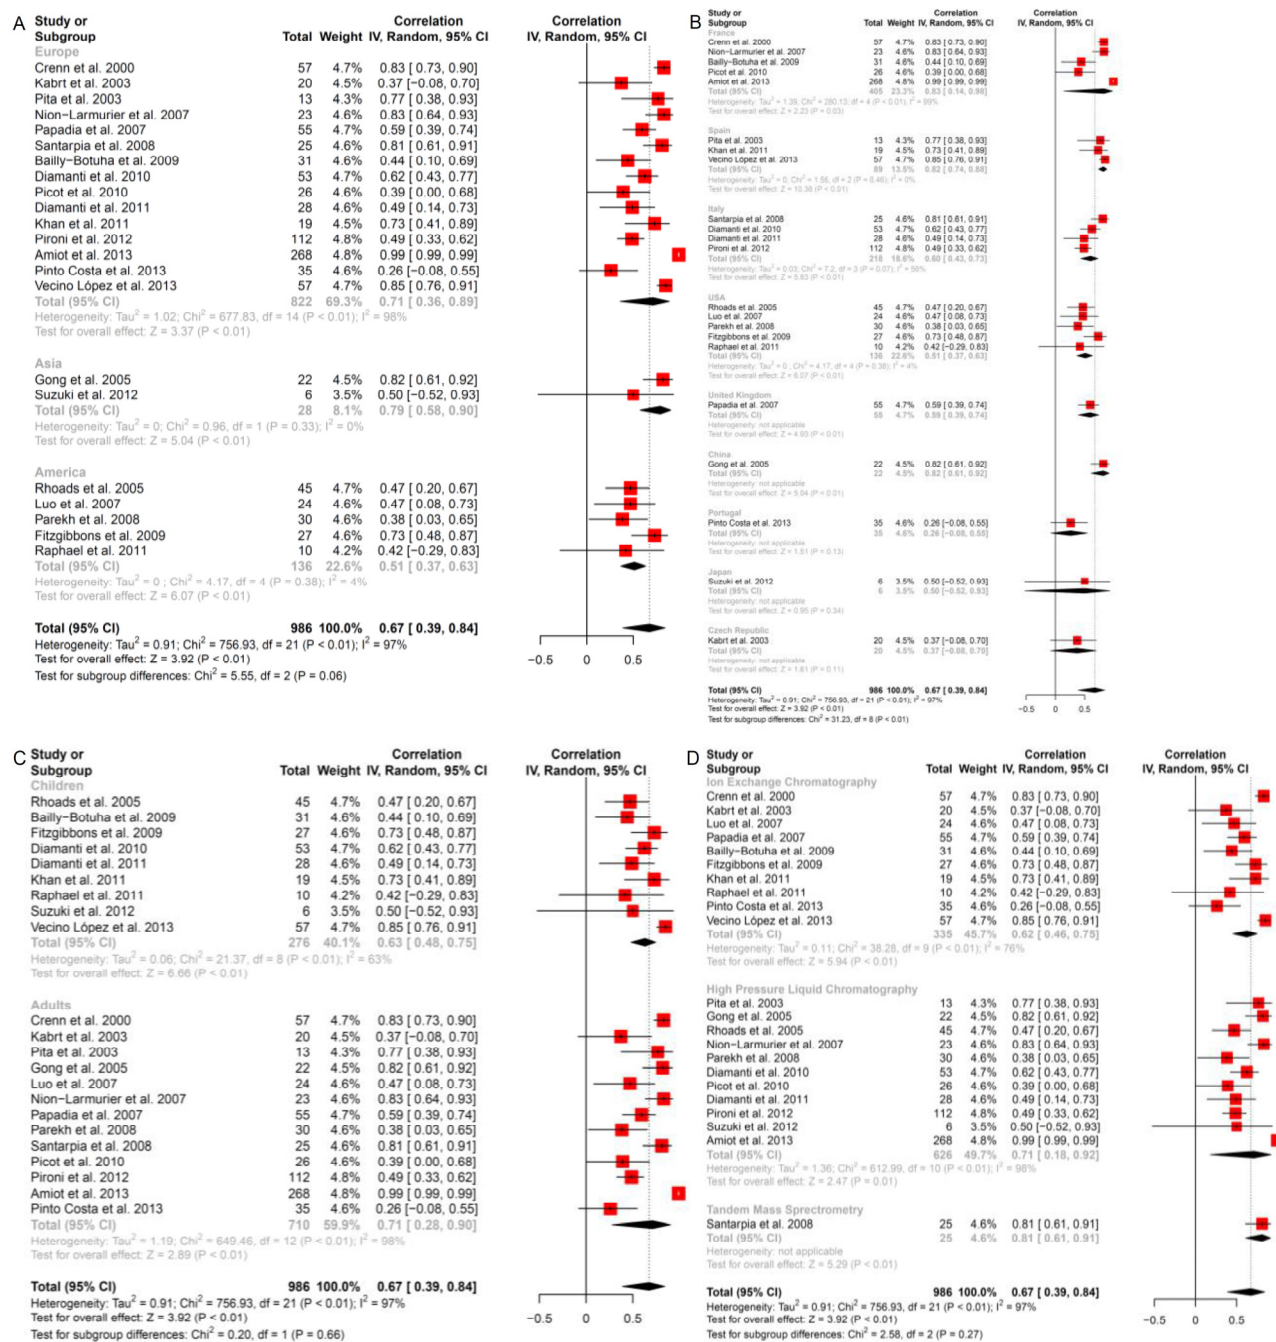

**Supplementary Figure 3.** Forest plots of short bowel syndrome correlations with small bowel length – subgroup analyses by (A) continent, (B) country, (C) patient type, and (D) citrulline measurement method.

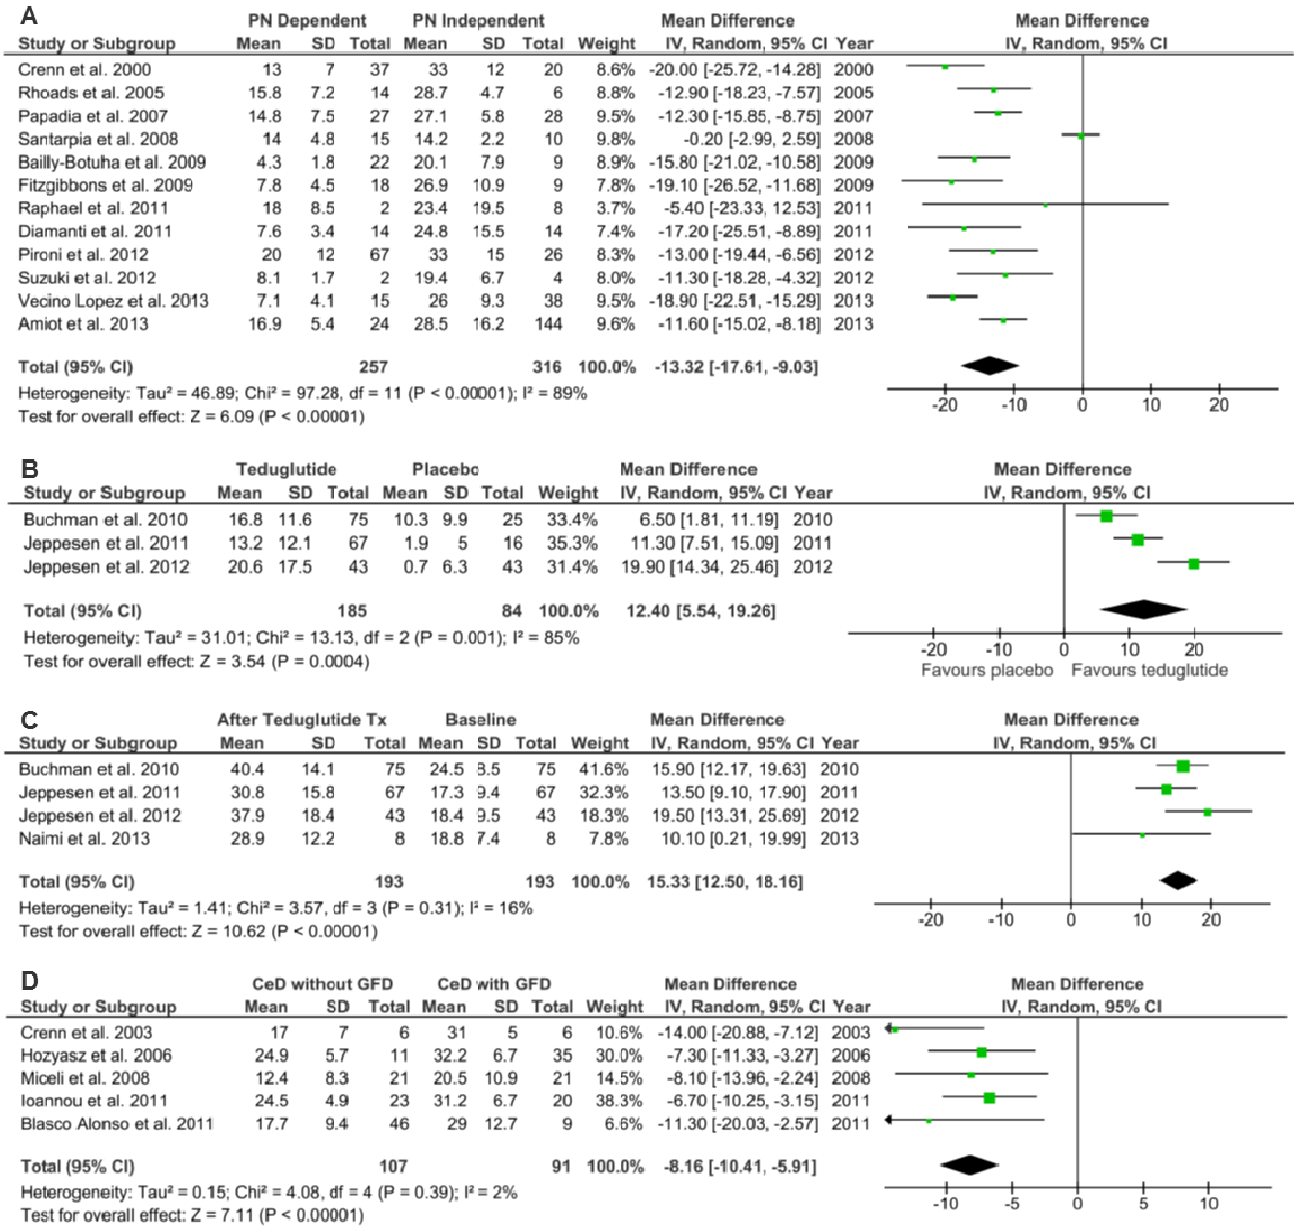

**Supplementary Figure 4.** Forest plots. (A) Mean differences of citrulline levels between PN dependent and independent SBS patients. (B) Mean increase of citrulline levels after treatment with teduglutide vs placebo in SBS patients. (C) Mean increase of citrulline levels after treatment with teduglutide vs baseline in SBS patients. (D) Mean difference of citrulline levels in coeliac disease patients who had received GFD treatment vs those who had not.

## Funnel plots with pseudo 95% confidence limits

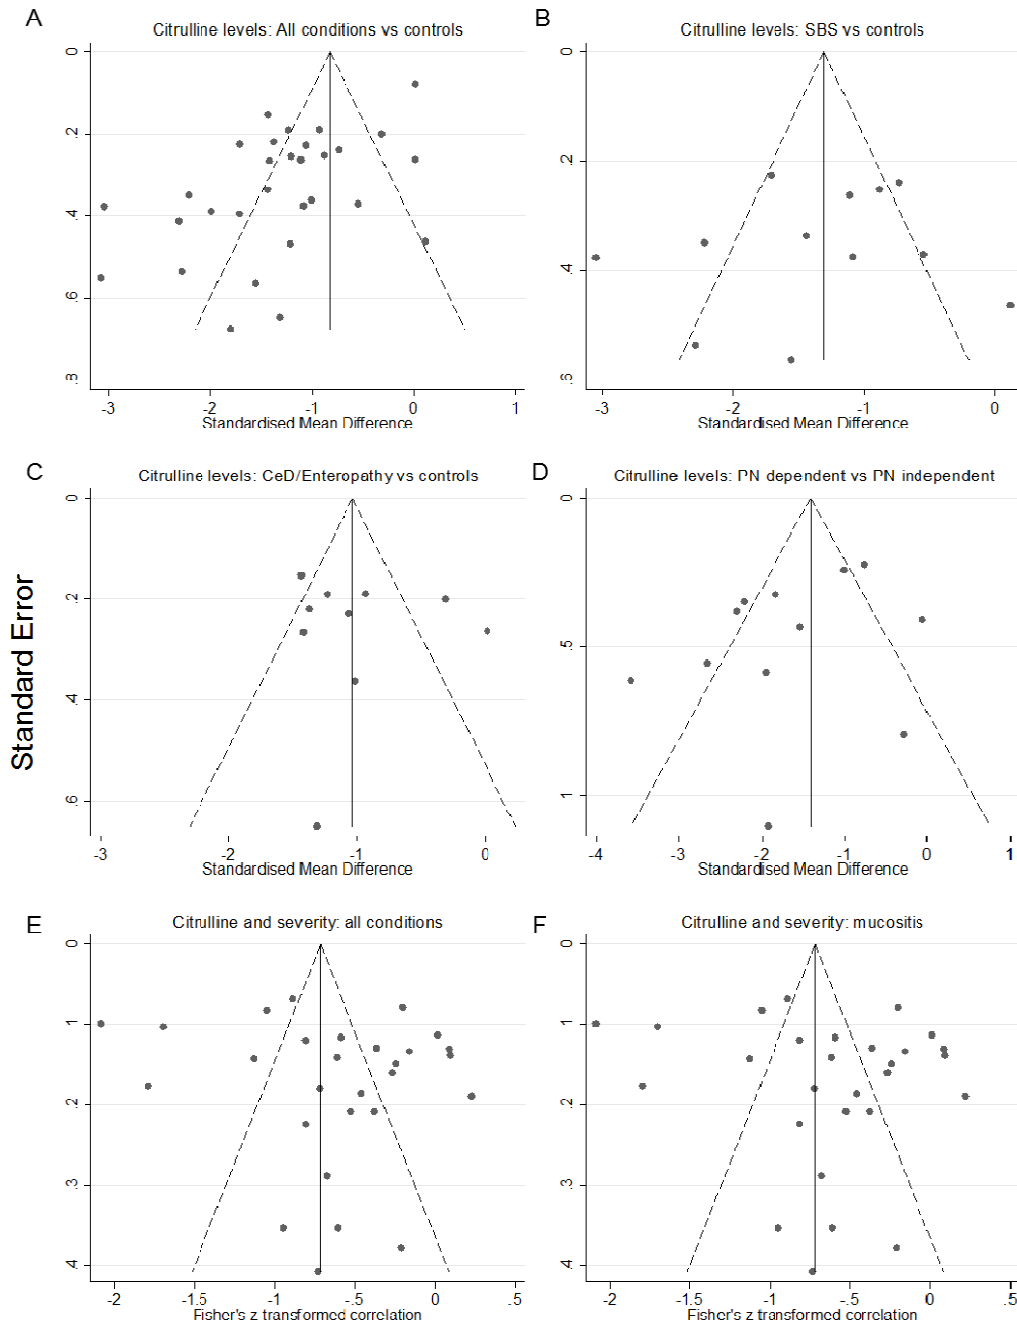

**Supplementary Figure 5.** Funnel plots. A. Mean citrulline levels: All conditions vs controls (30 studies). No asymmetry seen. B. Mean citrulline levels: SBS vs controls. No asymmetry observed. C. Mean citrulline levels: CeD/Enteropathy vs controls. No asymmetry observed. D. Mean citrulline levels: PN dependent vs PN independent patients. No asymmetry observed. E. Citrulline levels with disease severity in all conditions (28 studies). No asymmetry seen. F. Citrulline levels with disease severity in mucositis after chemoradiation. No asymmetry observed.

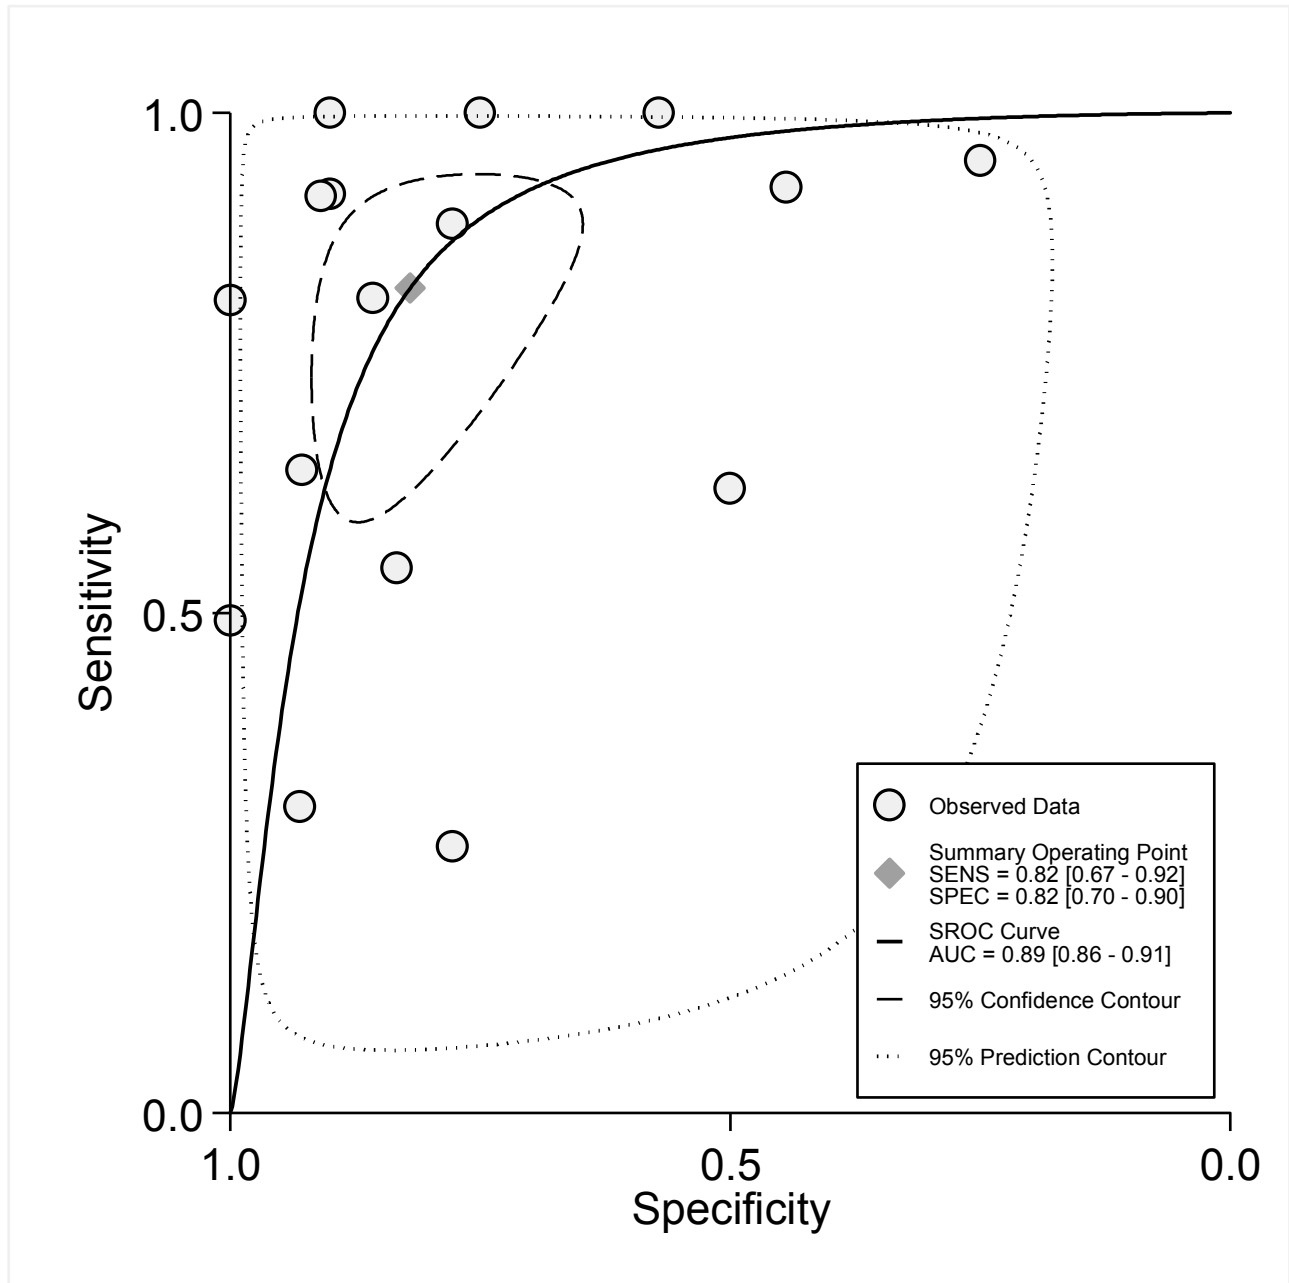

**Supplementary Figure 6.** Summary ROC curve for diagnostic accuracy in SBS patients.

## Short bowel syndrome

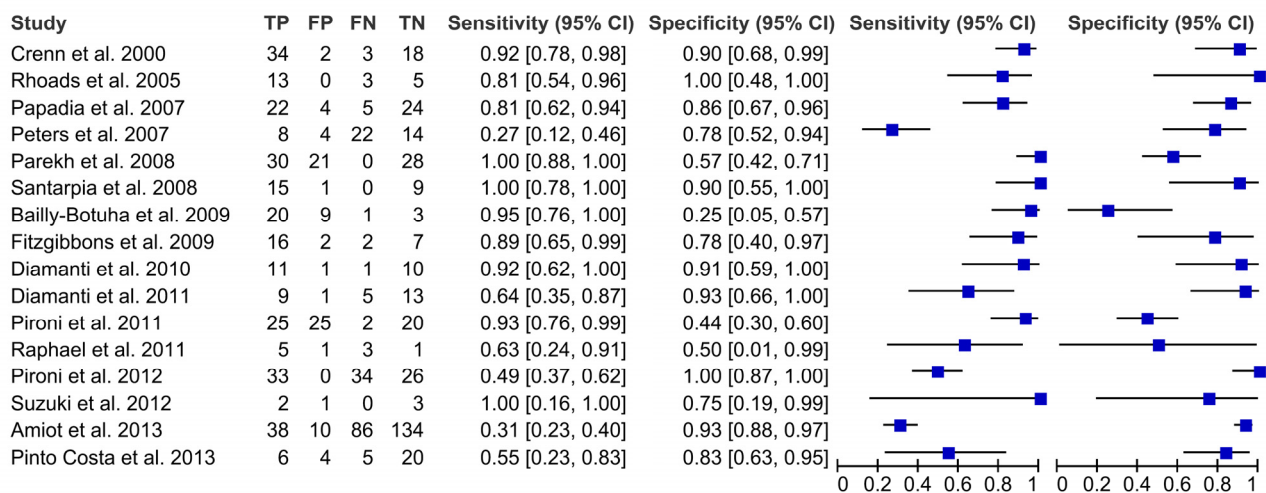

## Crohn's disease

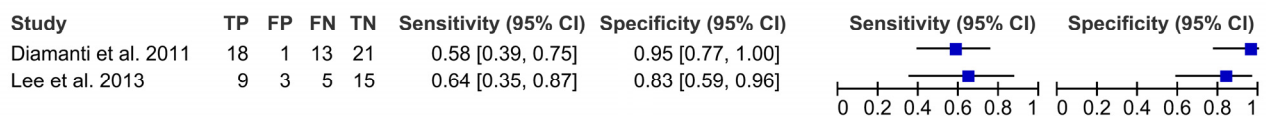

## Intestinal Transplantation

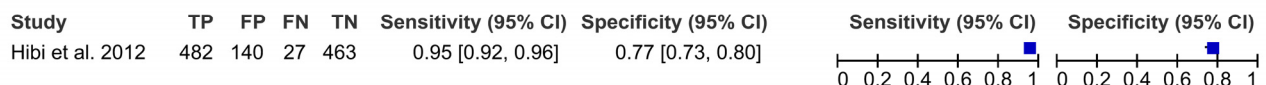

## Necrotising Enterocolitis

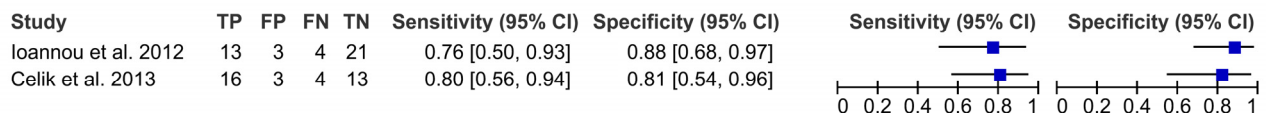

## Coeliac Disease

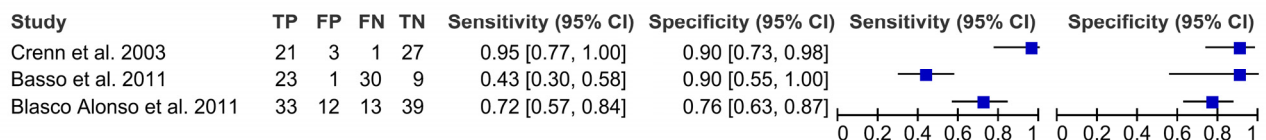

## Enteropathy

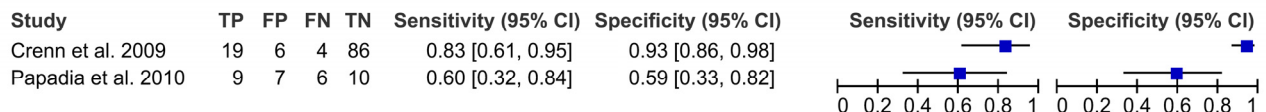

Supplementary Figure 7. Forest plots of sensitivity and specificity in all patient conditions (26 studies).

## Supplementary References

- Alekseeva EV and Sal'nikov PS. (2014) [Glutamine, glutamate and citrulline concentration in blood plasma in patients in critical condition (pilot study results)]. *Patologicheskaja Fiziologija i Eksperimental'naja Terapija*: 45-51.
- Amiot A, Messing B, Corcos O, et al. (2013) Determinants of home parenteral nutrition dependence and survival of 268 patients with non-malignant short bowel syndrome. *Clinical Nutrition* 32: 368-374.
- Backman L, Hallberg D and Kallner A. (1975) Amino acid pattern in plasma before and after jejuno-ileal shunt operation for obesity. *Scandinavian Journal of Gastroenterology* 10: 811-816.
- Bailly-Botuha C, Colomb V, Thioulouse E, et al. (2009) Plasma citrulline concentration reflects enterocyte mass in children with short bowel syndrome. *Pediatric Research* 65: 559-563.
- Basso MS, Capriati T, Goffredo BM, et al. (2014) Citrulline as marker of atrophy in celiac disease. *Internal and Emergency Medicine* 9: 705-707.
- Becker RM, Wu G, Galanko JA, et al. (2000) Reduced serum amino acid concentrations in infants with necrotizing enterocolitis. *Journal of Pediatrics* 137: 785-793.
- Begg CB and Mazumdar M. (1994) Operating Characteristics of a Rank Correlation Test for Publication Bias. *Biometrics* 50: 1088-1101.
- Bernini P, Bertini I, Calabro A, et al. (2011) Are patients with potential celiac disease really potential? The answer of metabolomics. *Journal of Proteome Research* 10: 714-721.
- Blasco Alonso J, Serrano Nieto J, Navas Lopez VM, et al. (2011) [Plasma citrulline as a marker of loss of enterocytary mass in coeliac disease in childhood]. *Nutrición Hospitalaria* 26: 807-813.
- Blijlevens NM, Donnelly JP and DePauw BE. (2005a) Inflammatory response to mucosal barrier injury after myeloablative therapy in allogeneic stem cell transplant recipients. *Bone Marrow Transplantation* 36: 703-707.
- Blijlevens NM, Donnelly JP, Naber AH, et al. (2005b) A randomised, double-blinded, placebo-controlled, pilot study of parenteral glutamine for allogeneic stem cell transplant patients. *Supportive Care in Cancer* 13: 790-796.
- Blijlevens NMA, Lutgens LCHW, Schattenberg AVMB, et al. (2004) Citrulline: A potentially simple quantitative marker of intestinal epithelial damage following myeloablative therapy. *Bone Marrow Transplantation* 34: 193-196.
- Borenstein M, Hedges LV, Higgins JPT, et al. (2008) *Introduction to meta-analysis*, Chichester, U.K.: John Wiley & Sons.
- Bowden J, Tierney JF, Copas AJ, et al. (2011) Quantifying, displaying and accounting for heterogeneity in the meta-analysis of RCTs using standard and generalised Q statistics. *BMC Medical Research Methodology* 11: 41.
- Brady D, Horn S, Yakkundi S, et al. (2015) PO-0739: Plasma citrulline is a potential biomarker for small bowel toxicity following radiotherapy for prostate cancer. *Radiotherapy and Oncology* 115: S366.
- Buchman AL, Katz S, Fang JC, et al. (2010) Teduglutide, a novel mucosally active analog of glucagon-like peptide-2 (GLP-2) for the treatment of moderate to severe Crohn's disease. *Inflammatory Bowel Diseases* 16: 962-973.
- Carswell KA, Vincent RP, Belgaumkar AP, et al. (2014) The effect of bariatric surgery on intestinal absorption and transit time. *Obesity Surgery* 24: 796-805.
- Celik IH, Demirel G, Canpolat FE, et al. (2013) Reduced plasma citrulline levels in low birth weight infants with necrotizing enterocolitis. *Journal of Clinical Laboratory Analysis* 27: 328-332.
- Cohen J. (1988) *Statistical power analysis for the behavioral sciences*, Hillsdale, N.J.: L. Erlbaum Associates.
- Cooper HM, Hedges LV and Valentine JC. (2009) *The handbook of research synthesis and meta-analysis*, New York: Russell Sage Foundation.
- Crenn P, Coudray-Lucas C, Cynober L, et al. (1998) Post-absorptive plasma citrulline concentration: A marker of intestinal failure in humans. *Transplantation Proceedings* 30: 2528.

- Crenn P, Coudray-Lucas C, Thuillier F, et al. (2000) Postabsorptive plasma citrulline concentration is a marker of absorptive enterocyte mass and intestinal failure in humans. *Gastroenterology* 119: 1496-1505.
- Crenn P, De Truchis P, Neveux N, et al. (2009a) Plasma citrulline is a biomarker of enterocyte mass and an indicator of parenteral nutrition in HIV-infected patients. *American Journal of Clinical Nutrition* 90: 587-594.
- Crenn P, de Truchis P, Neveux N, et al. (2009b) La citrullinémie, un marqueur de l'évolution et du pronostic au cours du suivi des entéropathies. *Gastroentérologie Clinique et Biologique* 33: A204.
- Crenn P, Neveux N, Chevret S, et al. (2010) Plasma Citrulline Kinetic and Its Relation with Glutamine, Arginine, TNF[alpha] and IL10 in ICU Septic Shock Patients With Multiple Organ Failure. *Clinical Nutrition Supplements* 5: 214-215.
- Crenn P, Vahedi K, Lavergne-Slove A, et al. (2003) Plasma citrulline: A marker of enterocyte mass in villous atrophy-associated small bowel disease. *Gastroenterology* 124: 1210-1219.
- David AI, Gaynor JJ, Zis PP, et al. (2006) An Association of Lower Serum Citrulline Levels Within 30 Days of Acute Rejection in Patients Following Small Intestine Transplantation. *Transplantation Proceedings* 38: 1731-1732.
- David AI, Selvaggi G, Ruiz P, et al. (2007) Blood citrulline level is an exclusionary marker for significant acute rejection after intestinal transplantation. *Transplantation* 84: 1077-1081.
- David AI, Szutan LA, Gaynor J, et al. (2008) [Critical value of citrulline for complications of intestinal transplant graft]. *Revista da Associação Médica Brasileira* 54: 426-429.
- Derikx JP, Blijlevens NM, Donnelly JP, et al. (2009) Loss of enterocyte mass is accompanied by diminished turnover of enterocytes after myeloablative therapy in haematopoietic stem-cell transplant recipients. *Annals of Oncology* 20: 337-342.
- DerSimonian R and Laird N. (1986) Meta-analysis in clinical trials. *Controlled Clinical Trials* 7: 177-188.
- Diamanti A, Knafelz D, Panetta F, et al. (2011a) Plasma citrulline as surrogate marker of intestinal inflammation in pediatric and adolescent with Crohn's disease: preliminary report. *International Journal of Colorectal Disease* 26: 1445-1451.
- Diamanti A, Noto C, Gandullia P, et al. (2010) PP6 Plasma citrulline and bowel adaptation in children with short bowel syndrome. *Digestive and Liver Disease* 42: S331-S332.
- Diamanti A, Panetta F, Gandullia P, et al. (2011b) Plasma citrulline as marker of bowel adaptation in children with short bowel syndrome. *Langenbeck's Archives of Surgery* 396: 1041-1046.
- Egger M, Smith GD, Schneider M, et al. (1997) Bias in meta-analysis detected by a simple, graphical test. *British Medical Journal* 315: 629-634.
- Elkhatib I and Buchman AL. (2012) Plasma citrulline concentration as a marker for disease activity in patients with Crohn's disease. *Journal of Clinical Gastroenterology* 46: 308-310.
- Englund A, Rogvi Rá, Melgaard L, et al. (2014) Citrulline concentration in routinely collected neonatal dried blood spots cannot be used to predict necrotising enterocolitis. *Acta Paediatrica* 103: 1143-1147.
- Faraone SV. (2008) Interpreting estimates of treatment effects: implications for managed care. *Pharmacy and Therapeutics* 33: 700-711.
- Fitzgibbons S, Ching YA, Valim C, et al. (2009) Relationship between serum citrulline levels and progression to parenteral nutrition independence in children with short bowel syndrome. *Journal of Pediatric Surgery* 44: 928-932.
- Fragkos KC, Tsagris M and Frangos CC. (2014) Publication Bias in Meta-Analysis: Confidence Intervals for Rosenthal's Fail-Safe Number. *International Scholarly Research Notices* 2014: 1-17.
- Gilroy R, O'Keefe SJ, McGraw N, et al. (2009) Citrulline: A Potential Predictor of Reductions in Parenteral Nutrition Achieved in Chronic Parenteral Nutrition Dependant Patients with Short Bowel Syndrome (SBS) Treated with Teduglutide. *Gastroenterology* 136: A139-A140.
- Gondolesi G, Fishbein T, Chehade M, et al. (2002) Serum citrulline is a potential marker for rejection of intestinal allografts. *Transplantation Proceedings* 34: 918-920.
- Gondolesi G, Ghirardo S, Raymond K, et al. (2006) The value of plasma citrulline to predict mucosal injury in intestinal allografts. *American Journal of Transplantation* 6: 2786-2790.



- Gondolesi GE, Kaufman SS, Sansaricq C, et al. (2004) Defining Normal Plasma Citrulline in Intestinal Transplant Recipients. *American Journal of Transplantation* 4: 414-418.
- Gong J-f, Zhu W-m, Li N, et al. (2005) Serum citrulline is a simple quantitative marker for small intestinal enterocytes mass and absorption function in short bowel patients. *Journal of Surgical Research* 127: 177-182.
- Gong J-f, Zhu W-m, Li N, et al. (2007) [Serum citrulline: a potential marker for intestinal epithelial mass and absorption capacity in short bowel syndrome patients]. *Chinese Journal of Gastrointestinal Surgery* 10: 333-337.
- Gong J-f, Zhu W-m, Yu W-k, et al. (2009) Role of enteral nutrition in adult short bowel syndrome undergoing intestinal rehabilitation: the long-term outcome. *Asia Pacific Journal of Clinical Nutrition* 18: 155-163.
- Gosselin KB, Feldman HA, Sonis AL, et al. (2014) Serum citrulline as a biomarker of gastrointestinal function during hematopoietic cell transplantation in children. *Journal of Pediatric Gastroenterology and Nutrition* 58: 709-714.
- Grimaldi D, Guivarch E, Neveux N, et al. (2013) Markers of intestinal injury are associated with endotoxemia in successfully resuscitated patients. *Resuscitation* 84: 60-65.
- Harbord RM, Deeks JJ, Egger M, et al. (2007) A unification of models for meta-analysis of diagnostic accuracy studies. *Biostatistics* 8: 239-251.
- Herbers AH, Blijlevens NM, Donnelly JP, et al. (2008) Bacteraemia coincides with low citrulline concentrations after high-dose melphalan in autologous HSCT recipients. *Bone Marrow Transplantation* 42: 345-349.
- Herbers AH, Feuth T, Donnelly JP, et al. (2010) Citrulline-based assessment score: first choice for measuring and monitoring intestinal failure after high-dose chemotherapy. *Annals of Oncology* 21: 1706-1711.
- Hibi T, Nishida S, Garcia J, et al. (2012) Citrulline level is a potent indicator of acute rejection in the long term following pediatric intestinal/multivisceral transplantation. *American Journal of Transplantation* 12: S27-32.
- Higgins JPT, Green S and Cochrane Collaboration. (2008) *Cochrane handbook for systematic reviews of interventions*, Chichester, England ; Hoboken, NJ: Wiley-Blackwell.
- Higgins JPT and Thompson SG. (2002) Quantifying heterogeneity in a meta-analysis. *Statistics in Medicine* 21: 1539-1558.
- Higgins JPT, Thompson SG, Deeks JJ, et al. (2003) Measuring inconsistency in meta-analyses. *British Medical Journal* 327: 557-560.
- Hozyasz KK, Szaflarska-Poplawska A, Oltarzewski M, et al. (2006) [Whole blood citrulline levels in patients with coeliac disease]. *Polski Merkuriusz Lekarski* 20: 173-175.
- Huedo-Medina TB, Sanchez-Meca J, Marin-Martinez F, et al. (2006) Assessing heterogeneity in meta-analysis: Q statistic or I<sup>2</sup> index? *Psychological Methods* 11: 193-206.
- Ioannou HP, Diamanti E, Piretzi K, et al. (2012) Plasma citrulline levels in preterm neonates with necrotizing enterocolitis. *Early Human Development* 88: 563-566.
- Ioannou HP, Fotoulaki M, Pavlitou A, et al. (2011) Plasma citrulline levels in paediatric patients with celiac disease and the effect of a gluten-free diet. *European Journal of Gastroenterology and Hepatology* 23: 245-249.
- Jakobsson S, Ahlberg K, Taft C, et al. (2010) Exploring a link between fatigue and intestinal injury during pelvic radiotherapy. *Oncologist* 15: 1009-1015.
- Jeevanandam M, Ramias L and Schiller WR. (1991) Altered plasma free amino acid levels in obese traumatized man. *Metabolism* 40: 385-390.
- Jeppesen PB, Gilroy R, Pertkiewicz M, et al. (2011) Randomised placebo-controlled trial of teduglutide in reducing parenteral nutrition and/or intravenous fluid requirements in patients with short bowel syndrome. *Gut* 60: 902-914.
- Jeppesen PB, Pertkiewicz M, Messing B, et al. (2012) Teduglutide reduces need for parenteral support among patients with short bowel syndrome with intestinal failure. *Gastroenterology* 143: 1473-1481 e1473.

- Jeppesen PB, Tappenden KA, Gilroy R, et al. (2009) 897 Teduglutide, a Novel GLP-2 Analogue, Decreases Fecal Wet Weight, Sodium and Potassium Excretion in Short Bowel Syndrome (SBS) Patients Dependent On Parenteral Nutrition (PN). *Gastroenterology* 136: A139.
- Kábrt J, Hyánek J, Šťastná S, et al. (2003) Plasma Citrulline Concentration as a Marker of Small Intestine Failure. *Biomedical Papers* 147: 75.
- Kao C, Hsu J, Bandi V, et al. (2013) Alterations in glutamine metabolism and its conversion to citrulline in sepsis. *American Journal of Physiology - Endocrinology and Metabolism* 304: E1359-1364.
- Karlik JB, Kesavan A, Nieder ML, et al. (2014) Plasma citrulline as a biomarker for enterocyte integrity in pediatric blood and BMT. *Bone Marrow Transplantation* 49: 449-450.
- Khan MA, Miserachs M, Hofmeister B, et al. (2011) S79 - Degree of Parenteral Nutrition Support Correlates with Serum Citrulline Levels in Short Bowel Syndrome. *Journal of Parenteral and Enteral Nutrition* 35: 62.
- Kong W, Wang J, Ping X, et al. (2015) Biomarkers for assessing mucosal barrier dysfunction induced by chemotherapy: Identifying a rapid and simple biomarker. *Clinical Laboratory* 61: 371-378.
- Lee EH, Ko JS and Seo JK. (2013) Correlations of plasma citrulline levels with clinical and endoscopic score and blood markers according to small bowel involvement in pediatric Crohn disease. *Journal of Pediatric Gastroenterology and Nutrition* 57: 570-575.
- Lipsey MW and Wilson DB. (2001) *Practical meta-analysis*, Thousand Oaks, CA, US: Sage Publications, Inc.
- Luiking YC, Poeze M, Ramsay G, et al. (2009) Reduced citrulline production in sepsis is related to diminished de novo arginine and nitric oxide production. *American Journal of Clinical Nutrition* 89: 142-152.
- Lundy J, Chung KK, Cancio LC, et al. (2012) Observations on serial plasma citrulline concentrations in a patient with intestinal ischemia and full-thickness necrosis after severe thermal injury. *Journal of Burn Care & Research* 33: e316-318.
- Luo M, Fernández-Estívariz C, Manatunga AK, et al. (2007) Are plasma citrulline and glutamine biomarkers of intestinal absorptive function in patients with short bowel syndrome? *Journal of Parenteral and Enteral Nutrition* 31: 1-7.
- Lutgens L, Granzier M, Beets-Tan R, et al. (2002) 638 Poster Plasma citrulline levels correlate with CT scan based small bowel volume parameters. Results of a pilot study in ten patients. *Radiotherapy and Oncology* 64: S196.
- Lutgens LCHW, Blijlevens NMA, Deutz NEP, et al. (2005) Monitoring myeloablative therapy-induced small bowel toxicity by serum citrulline concentration: a comparison with sugar permeability tests. *Cancer* 103: 191-199.
- Lutgens LCHW, Deutz N, Granzier-Peeters M, et al. (2004) Plasma citrulline concentration: a surrogate end point for radiation-induced mucosal atrophy of the small bowel. A feasibility study in 23 patients. *International Journal of Radiation Oncology, Biology, Physics* 60: 275-285.
- Miceli E, Poggi N, Missanelli A, et al. (2008) Is serum citrulline measurement clinically useful in coeliac disease? . *Internal and Emergency Medicine* 3: 233-236.
- Moher D, Liberati A, Tetzlaff J, et al. (2009) Preferred Reporting Items for Systematic Reviews and Meta-Analyses: The PRISMA Statement. *Journal of Clinical Epidemiology* 62: 1006-1012.
- Müller WA, Cüppers HJ, Zimmermann-Telschow H, et al. (1983) Amino acids and lipoproteins in plasma of duodenopancreatectomized patients: effects of glucagon in physiological amounts. *European Journal of Clinical Investigation* 13: 141-149.
- Naimi RM, Madsen KB, Askov-Hansen C, et al. (2013) A dose-equivalent comparison of the effects of continuous subcutaneous glucagon-like peptide 2 (GLP-2) infusions versus meal related GLP-2 injections in the treatment of short bowel syndrome (SBS) patients. *Regulatory Peptides* 184: 47-53.
- Nion-Larmurier I, Seksik P, Sebbagh Humbert V, et al. (2007) La citrullinémie préopératoire est un marqueur du potentiel fonctionnel du grêle court après rétablissement de la continuité. *Gastroentérologie Clinique et Biologique* 31: A40.
- Noordally SO, Sohawon S, Semlali H, et al. (2012) Is There a Correlation Between Circulating Levels of Citrulline and Intestinal Dysfunction in the Critically Ill? *Nutrition in Clinical Practice* 27: 527-532.

- Noto C, Diamanti A, Basso M, et al. (2008a) O048 Clinical Role of Plasma Citrulline in Predicting Enteral Tolerance in Children with Small Bowel Syndrome. *Clinical Nutrition Supplements* 3: 22-23.
- Noto C, Diamanti A, Basso MS, et al. (2008b) Clinical role of plasma citrulline in predicting enteral tolerance in children with small bowel syndrome. *Digestive and Liver Disease* 40: A62-A63.
- Onal C, Kotek A, Unal B, et al. (2011) Plasma citrulline levels predict intestinal toxicity in patients treated with pelvic radiotherapy. *Acta Oncologica* 50: 1167-1174.
- Pan L, Wang X, Li W, et al. (2010) The intestinal fatty acid binding protein diagnosing gut dysfunction in acute pancreatitis: a pilot study. *Pancreas* 39: 633-638.
- Panetta F, Diamanti A, Bracci F, et al. (2010) CO10 Postabsorptive plasma citrulline: A surrogate marker of intestinal inflammation in children and adolescents with Crohn's disease. *Digestive and Liver Disease* 42: S325-S326.
- Papadia C, Dhaliwal W, Kelly P, et al. (2009a) Plasma Citrulline as a Quantitative Biomarker of HIV-Associated Duodenal Mucosal Damage in a Tropical Enteropathy Population. *Digestive and Liver Disease* 41: S65-S66.
- Papadia C, Kelly P, Caini S, et al. (2010) Plasma citrulline as a quantitative biomarker of HIV-associated villous atrophy in a tropical enteropathy population. *Clinical Nutrition* 29: 795-800.
- Papadia C, Kelly P, Corazza GR, et al. (2009b) Plasma Citrulline As Quantitative Biomarker of HIV Associate Villous Atrophy in a Tropical Enteropathy Population. *Gastroenterology* 136: A323.
- Papadia C, Sherwood RA, Kalantzis C, et al. (2007) Plasma citrulline concentration: A reliable marker of small bowel absorptive capacity independent of intestinal inflammation. *American Journal of Gastroenterology* 102: 1474-1482.
- Papadia C, Sherwood RA, Kalantzis T, et al. (2006a) Plasma Citrulline Concentration: A Simple, Sensitive, and Non-Invasive Method to Monitor Small Bowel Absorptive Function in Patients with Crohn's Disease. *Gut* 55: A11.
- Papadia C, Sherwood RA, Kalantzis T, et al. (2006b) Plasma Citrulline Concentration Is a Reliable Marker of Small Bowel Absorptive Capacity in Crohn's Disease and Is Independent of Intestinal Inflammation. *Gastroenterology* 130: A-611.
- Pappas PA, G Tzakis A, Gaynor JJ, et al. (2004a) An analysis of the association between serum citrulline and acute rejection among 26 recipients of intestinal transplant. *American Journal of Transplantation* 4: 1124-1132.
- Pappas PA, Saudubray JM, Tzakis AG, et al. (2002) Serum citrulline as a marker of acute cellular rejection for intestinal transplantation. *Transplantation Proceedings* 34: 915-917.
- Pappas PA, Saudubray JM, Tzakis AG, et al. (2001) Serum citrulline and rejection in small bowel transplantation: A preliminary report. *Transplantation* 72: 1212-1216.
- Pappas PA, Tzakis AG, Saudubray J-M, et al. (2004b) Trends in serum citrulline and acute rejection among recipients of small bowel transplants. *Transplantation Proceedings* 36: 345-347.
- Parekh NR, Natowicz M, Lopez R, et al. (2008) Plasma Citrulline Is a Marker of Home Parenteral Nutrition Dependence in Patients with Short Bowel Syndrome. *Clinical Nutrition Supplements* 3: 71-72.
- Peters JH, Wierdsma NJ, Teerlink T, et al. (2007a) Citrulline Stimulation Test To Assess Enterocyte Metabolic Function Is Feasible: Reference Values Of A New Test. *Journal of Parenteral and Enteral Nutrition* 31: S8-S9.
- Peters JH, Wierdsma NJ, Teerlink T, et al. (2007b) Sensitivity And Specificity Of Fasting Plasma Citrulline Concentration To Assess Enterocyte Dysfunction. *Journal of Parenteral and Enteral Nutrition* 31: S55.
- Peters JHC, Dobrowolski LC, Wierdsma NJ, et al. (2009) The citrulline generation test in stable ICU patients: optimizing a new enterocyte function test. *European Journal of Gastroenterology and Hepatology* 21: A62.
- Peters JHC, Wierdsma NJ, Teerlink T, et al. (2007c) Poor diagnostic accuracy of a single fasting plasma citrulline concentration to assess intestinal energy absorption capacity. *American Journal of Gastroenterology* 102: 2814-2819.
- Peters JHC, Wierdsma NJ, Teerlink T, et al. (2008) The citrulline generation test: proposal for a new enterocyte function test. *Alimentary Pharmacology & Therapeutics* 27: 1300-1310.

- Picot D, Garin L, Trivin F, et al. (2010) Plasma citrulline is a marker of absorptive small bowel length in patients with transient enterostomy and acute intestinal failure. *Clinical Nutrition* 29: 235-242.
- Pinto Costa B, Serodio M, Simoes M, et al. (2013) Citrullinemia stimulation test in the evaluation of the intestinal function. *Nutrición Hospitalaria* 28: 202-210.
- Pironi L, Guidetti M, Agostini F, et al. (2011) PP040-SUN Translating plasma citrulline concentration in clinical practice. *Clinical Nutrition Supplements* 6: 38.
- Pironi L, Guidetti M, Agostini F, et al. (2012) OC.10.4 Translating the assessment of plasma citrulline concentration in clinical practice. *Digestive and Liver Disease* 44: S77.
- Pironi L, Lauro A, Spinucci G, et al. (2005) Plasma citrulline in short bowel syndrome and intestinal transplantation. *Clinical Nutrition* 24: 630.
- Pita AM, Fernandez-Bustos A, Rodes M, et al. (2004) Orotic aciduria and plasma urea cycle-related amino acid alterations in short bowel syndrome, evoked by an arginine-free diet. *Journal of Parenteral and Enteral Nutrition* 28: 315-323.
- Pita AM, Wakabayashi Y, Fernandez-Bustos MA, et al. (2003) Plasma urea-cycle-related amino acids, ammonium levels, and urinary orotic acid excretion in short-bowel patients managed with an oral diet. *Clinical Nutrition* 22: 93-98.
- Piton G, Belin N, Barrot L, et al. (2015a) Enterocyte Damage: A Piece in the Puzzle of Post Cardiac Arrest Syndrome. *Shock* 44: 438-444.
- Piton G, Belon F, Cypriani B, et al. (2013) Enterocyte damage in critically ill patients is associated with shock condition and 28-day mortality. *Critical Care Medicine* 41: 2169-2176.
- Piton G, Cypriani B, Regnard J, et al. (2015b) Catecholamine use is associated with enterocyte damage in critically ill patients. *Shock* 43: 437-442.
- Piton G, Manzon C, Monnet E, et al. (2010) Plasma citrulline kinetics and prognostic value in critically ill patients. *Intensive Care Medicine* 36: 702-706.
- Poole A, Deane A, Summers M, et al. (2015) The relationship between fasting plasma citrulline concentration and small intestinal function in the critically ill. *Critical Care* 19: 1-8.
- Raphael BP, Nurko S, Jiang H, et al. (2011) Cisapride improves enteral tolerance in pediatric short-bowel syndrome with dysmotility. *Journal of Pediatric Gastroenterology and Nutrition* 52: 590-594.
- Rhoads JM, Plunkett E, Galanko J, et al. (2005) Serum citrulline levels correlate with enteral tolerance and bowel length in infants with short bowel syndrome. *Journal of Pediatrics* 146: 542-547.
- Rosenthal R. (1979) The file drawer problem and tolerance for null results. *Psychological Bulletin* 86: 638-641.
- Ruiz P, Tryphonopoulos P, Island E, et al. (2010) Citrulline evaluation in bowel transplantation. *Transplantation Proceedings* 42: 54-56.
- Sandstrom P, Gasslander T, Sundqvist T, et al. (2003) Depletion of serum L-arginine in patients with acute pancreatitis. *Pancreas* 27: 261-266.
- Sandstrom P, Trulsson L, Gasslander T, et al. (2008) Serum amino acid profile in patients with acute pancreatitis. *Amino Acids* 35: 225-231.
- Santarpia L, Catanzano F, Ruoppolo M, et al. (2008) Citrulline Blood Levels as Indicators of Residual Intestinal Absorption in Patients with Short Bowel Syndrome. *Annals of Nutrition & Metabolism* 53: 137-142.
- Seidner DL, Joly F and Youssef NN. (2015) Effect of Teduglutide, a Glucagon-like Peptide 2 Analog, on Citrulline Levels in Patients With Short Bowel Syndrome in Two Phase III Randomized Trials. *Clinical and Translational Gastroenterology* 6: e93.
- Sevinc E, Akar HH, Sevinc N, et al. (2015) Amino acid levels in children with celiac disease. *Nutrición Hospitalaria* 32: 139-143.
- Sterne JA, Sutton AJ, Ioannidis JP, et al. (2011) Recommendations for examining and interpreting funnel plot asymmetry in meta-analyses of randomised controlled trials. *British Medical Journal* 343: d4002.
- Stroup DF, Berlin JA, Morton SC, et al. (2000) Meta-analysis of observational studies in epidemiology: a proposal for reporting. Meta-analysis Of Observational Studies in Epidemiology (MOOSE) group. *Journal of the American Medical Association* 283: 2008-2012.

- Suzuki K, Kanamori Y, Sugiyama M, et al. (2012) Plasma citrulline may be a good marker of intestinal functions in intestinal dysfunction. *Pediatrics International* 54: 899-904.
- Thibault R, Avallone S, Orsonneau J, et al. (2009) Assessment of Plasma Citrulline, Iron, Vitamine D and Nutritional Status in the Short-Term Follow-Up of Roux-En-Y Gastric Bypass for Morbidly Obese Patients. *Obesity Surgery* 19: 957-958.
- Thibault R, Avallone S, Orsonneau J, et al. (2008) P351 Nutritional status, aminoacids and micronutrient plasma concentrations in the mid-term follow-up of roux-en-y gastric bypass for morbidly obese patients. *Clinical Nutrition Supplements* 3: 178.
- Través C, García-Arumí E, López-Hellín J, et al. (2010) Concomitant apolipoprotein A-IV and citrulline plasma changes during short-term parenteral nutrition in surgical patients. *e-SPEN* 5: e219-e224.
- van der Velden WJ, Herbers AH, Bruggemann RJ, et al. (2013) Citrulline and albumin as biomarkers for gastrointestinal mucositis in recipients of hematopoietic SCT. *Bone Marrow Transplantation* 48: 977-981.
- van der Velden WJ, Herbers AH, Feuth T, et al. (2010) Intestinal damage determines the inflammatory response and early complications in patients receiving conditioning for a stem cell transplantation. *PLoS One* 5: e15156.
- van Noord D, Mensink PB, de Kneegt RJ, et al. (2011) Serum markers and intestinal mucosal injury in chronic gastrointestinal ischemia. *Digestive Diseases and Sciences* 56: 506-512.
- van Vliet MJ, Tissing WJ, Rings EH, et al. (2009) Citrulline as a marker for chemotherapy induced mucosal barrier injury in pediatric patients. *Pediatric Blood & Cancer* 53: 1188-1194.
- Vecino Lopez R, Andres Moreno AM, Ramos Boluda E, et al. (2013) [Plasma citrulline concentration as a biomarker of intestinal function in short bowel syndrome and in intestinal transplant]. *Anales de Pediatría* 79: 218-223.
- Verdam FJ, Greve JW, Roosta S, et al. (2011) Small intestinal alterations in severely obese hyperglycemic subjects. *Journal of Clinical Endocrinology and Metabolism* 96: E379-383.
- Viswanathan M and Berkman ND. (2012) Development of the RTI item bank on risk of bias and precision of observational studies. *Journal of Clinical Epidemiology* 65: 163-178.
- Viswanathan M, Berkman ND, Dryden DM, et al. (2013) *Assessing Risk of Bias and Confounding in Observational Studies of Interventions or Exposures: Further Development of the RTI Item Bank*, Rockville MD.
- Vokurka S, Svoboda T, Rajdl D, et al. (2013) Serum citrulline levels as a marker of enterocyte function in patients after allogeneic hematopoietic stem cells transplantation - a pilot study. *Medical Science Monitor* 19: 81-85.
- Wang A, Ling Z, Yang Z, et al. (2015) Gut microbial dysbiosis may predict diarrhea and fatigue in patients undergoing pelvic cancer radiotherapy: a pilot study. *PLoS One* 10: e0126312.
- Ware LB, Magarik JA, Wickersham N, et al. (2013) Low plasma citrulline levels are associated with acute respiratory distress syndrome in patients with severe sepsis. *Critical Care* 17: R10.
- Wedlake L, McGough C, Hackett C, et al. (2008) Can biological markers act as non-invasive, sensitive indicators of radiation-induced effects in the gastrointestinal mucosa? *Alimentary Pharmacology & Therapeutics* 27: 980-987.
- Yu HC, Tuteja S, Moon JI, et al. (2005) Utilization of dried blood spot citrulline level as a noninvasive method for monitoring graft function following intestinal transplantation. *Transplantation* 80: 1729-1733.
- Zezulová M, Bartoušková M, Hlídková E, et al. (2016) Citrulline as a biomarker of gastrointestinal toxicity in patients with rectal carcinoma treated with chemoradiation. *Clinical Chemistry and Laboratory Medicine* 54: 305-314.
